# Supplementary material for: Nutritional Data on Selected Food Products Consumed in Oman: An Update of the Food Composition Table and Use for Future Food Consumption Surveys
Source: Preprints.org preprint supplement (doi:10.20944/preprints202402.0585.v1), 2024-02-09
Supplement: Supplementary file 1 [file supplementary]

**Supplementary Material**

**Table 1**: Food description and coding according FoodEx2 system

| Sample ID (from lab) | Name of Product & Brand | Food Item | FOOD TYPE FE2 | FoodEx2 Code | FoodEx2 Description | Description |
| --- | --- | --- | --- | --- | --- | --- |
| UIL.21.14412 | Pure honey / Capilano | Food | RPC - Raw Primary Commodities | A033J | Honey | Honey is a natural sweet substance produced by bees from the nectar of plants or from secretions of living parts of plants or excretions of plant-sucking insects on plants. Bees collect it, transform it by combining with specific substances of their own, deposit it, dehydrate it, store it and leave it in honeycombs to ripen and mature. |
| UIL.21.14414 | Natural Honey / Alshifa | Food | RPC - Raw Primary Commodities | A033J | Honey | Honey is a natural sweet substance produced by bees from the nectar of plants or from secretions of living parts of plants or excretions of plant-sucking insects on plants. Bees collect it, transform it by combining with specific substances of their own, deposit it, dehydrate it, store it and leave it in honeycombs to ripen and mature. |
| UIL.21.13443 | Wrigleys Doublemint Chewing Gum | Food | Composites | A035M#F04.A00XZ | Chewing gum, INGREDIENT = Mints | The group includes any type of Chewing gum, i.e. a confectionery product with the characteristic of being chewed but not swallowed. Aromatic fresh herb from the plant classified under the genus Mentha L. spp., commonly known as Mints. |
| UIL.21.14391 | Nutella Hazelnut Spread With Cocoa | Food | Composites | A0C6P | Chocolate spread | The group includes Spreadable chocolate products based on cacao ingredients, different types of fats and very often nut derivatives. For example chocolate-hazelnut spread like nutella and other similar brands are included in this group |
| UIL.21.13440 | Mars Minis | Food | Composites | A034R | Chocolate coated confectionery | The group includes any type of Chocolate coated confectionery, apart from the different bars present on the market and coated with chocolate that are included in a specific bar group. |
| UIL.21.13441 | Extra Peppermint | Food | Composites | A035M#F04.A00XZ | Chewing gum, INGREDIENT = Mints | The group includes any type of Chewing gum, i.e. a confectionery product with the characteristic of being chewed but not swallowed. Aromatic fresh herb from the plant classified under the genus Mentha L. spp., commonly known as Mints. |
| UIL.21.13438 | Snickers Minis | Food | Composites | A034R | Chocolate coated confectionery | The group includes any type of Chocolate coated confectionery, apart from the different bars present on the market and coated with chocolate that are included in a specific bar group. |
| UIL.21.13435 | Kinder Joy | Food | Composites | A034R | Chocolate coated confectionery | The group includes any type of Chocolate coated confectionery, apart from the different bars present on the market and coated with chocolate that are included in a specific bar group. |
| **Sample ID (from lab)** | **Name of Product & Brand** | **Food Item** | **FOOD TYPE FE2** | **FoodEx2 Code** | **FoodEx2 Description** | **Description** |
| UIL.21.13454 | Twix Minis | Food | Composites | A034R | Chocolate coated confectionery | The group includes any type of Chocolate coated confectionery, apart from the different bars present on the market and coated with chocolate that are included in a specific bar group. |
| UIL.21.13437 | Kitkat | Food | Composites | A034R | Chocolate coated confectionery | The group includes any type of Chocolate coated confectionery, apart from the different bars present on the market and coated with chocolate that are included in a specific bar group. |
| UIL.21.13444 | Mentos Sugar free Chewing Gum | Food | Composites | A035M#F10.A0CJD | Chewing gum, QUALITATIVE-INFO = Sugars-related info | The group includes any type of Chewing gum, i.e. a confectionery product with the characteristic of being chewed but not swallowed. Product non containing sugar or where sugar is only present in negligible amounts |
| UIL.21.13560 | Cream Caramel Almaraei | Food | Composites | A06MY#F28.A07HJ | Cream brulee flavour, PROCESS = Caramelization / browning | Mixture of chemicals and/or extracts formulated in such a way to reproduce the original Cream brulee flavour. |
| UIL.21.13550 | Danet Cream Caramel | Food | Composites | A06MY#F28.A07HJ | Cream brulee flavour, PROCESS = Caramelization / browning | Mixture of chemicals and/or extracts formulated in such a way to reproduce the original Cream brulee flavour. |
| UIL.21.13439 | Bounty Minis | Food | Composites | A034R | Chocolate coated confectionery | The group includes any type of Chocolate coated confectionery, apart from the different bars present on the market and coated with chocolate that are included in a specific bar group. |
| UIL.21.14396 | Daily Fresh/ Custard Powder | Food | Composites | A02PX#F10.A166Y | Custard, QUALITATIVE-INFO = Fresh | The group includes any type of Custard, such as Creme anglais and Pastry cream. A custard is a liquid thickened or set by the coagulation of egg protein. Since the group includes also desserts based on dairy imitates, information on the characterising ingredients has to be reported with additional facet descriptors. |
| UIL.21.13442 | Batook Specialmint Chewing Gum | Food | Composites | A035M#F04.A00XZ | Chewing gum, INGREDIENT = Mints | The group includes any type of Chewing gum, i.e. a confecti-onery product with the characteristic of being chewed but not swallowed. Aromatic fresh herb from the plant classified under the genus Mentha L. spp., commonly known as Mints. |
| UIL.21.14409 | Custard Powder/Tiara | Food | Composites | A02PX#F28.A07XY | Custard, PROCESS = Granulation (from powder) | The group includes any type of Custard, such as Creme anglais and Pastry cream. A custard is a liquid thickened or set by the coagulation of egg protein. Since the group includes also desserts based on dairy imitates, information on the characterising ingredients has to be reported with additional facet descriptors. |
| **Sample ID (from lab)** | **Name of Product & Brand** | **Food Item** | **FOOD TYPE FE2** | **FoodEx2 Code** | **FoodEx2 Description** | **Description** |
| UIL.21.14410 | Custard Powder / Alalali | Food | Composites | A02PX#F28.A07XY | Custard, PROCESS = Granulation (from powder) | The group includes any type of Custard, such as Creme anglais and Pastry cream. A custard is a liquid thickened or set by the coagulation of egg protein. Since the group includes also desserts based on dairy imitates, information on the characterising ingredients has to be reported with additional facet descriptors. |
| UIL.21.13458 | Nabil Cracker Salted Biscuits | Food | Composites | A005Y#F10.A0CJK | Crackers and breadsticks, QUALITATIVE-INFO = With added salt | The group includes any type of Crackers (i.e. grain flour dough layered and baked in form of salty biscuits) and dry breadsticks. Water crackers, soda crackers, biscuit crackers are included in this group. |
| UIL.21.14390 | Mani (Mixed Nuts ) | Food | RPC Derivatives | A0DYP#F10.A169R | Almonds and similar-, QUALITATIVE-INFO = Mixed origin | The group includes Almonds or similar nuts |
| UIL.21.17408 | Cheez Balls (Mr. Krispy) | Food | Composites | A00FC#F04.A02YK | Corn chips, INGREDIENT = Cheese, cheddar | The group includes any type of Corn chips, i.e snacks usually made with cornmeal-based dough. |
| UIL.21.13433 | Alrifai (Mixed Nuts) | Food | RPC Derivatives | A0DYP#F10.A169R | Almonds and similar-, QUALITATIVE-INFO = Mixed origin | The group includes Almonds or similar nuts |
| UIL.21.14388 | Shai ( Mix Nut) | Food | RPC Derivatives | A0DYP#F10.A169R | Almonds and similar-, QUALITATIVE-INFO = Mixed origin | The group includes Almonds or similar nuts |
| UIL.21.14384 | Al Mudhish Puffed Corn Cheese Balls | Food | Composites | A006L#F04.A02QE | Puffed corn textured bread, INGREDIENT = Cheese | The group includes any type of bread-like products obtained by compacting puffed granules of corn. |
| UIL.21.13432 | Best Salted Mixed Nuts | Food | RPC Derivatives | A0DYP#F10.A169R$F10.A0CJK | Almonds and similar-, QUALITATIVE-INFO = Mixed origin, QUALITATIVE-INFO = With added salt | The group includes Almonds or similar nuts |
| UIL.21.14418 | Cheese Balls (Pofak Oman) | Food | Composites | A00FC#F04.A06LZ | Corn chips, INGREDIENT = Cheese flavour | The group includes any type of Corn chips, i.e snacks usually made with cornmeal-based dough. |
| UIL.21.14551 | Cheese pastry (Dhahabi) | Food | Composites | A02QE#F04.A00CJ | Cheese, INGREDIENT = Various pastry | The group includes any type of Cheese and some additional products similar to cheese, like mascarpone and clotted cream. |
| UIL.21.13463 | Cheetos / Flamin Hot | Food | Composites | A0EQX#F10.A0EZY | Chips/crisps, QUALITATIVE-INFO = Hot/piquant/spicy | The group includes any type of thin-fried slices or sticks of potatoes, or similar crunchy products obtained by cereal doughs or vegetables, used as snack |
| **Sample ID (from lab)** | **Name of Product & Brand** | **Food Item** | **FOOD TYPE FE2** | **FoodEx2 Code** | **FoodEx2 Description** | **Description** |
| UIL.21.13462 | Pringles Original | Food | Composites | A0EQX | Chips/crisps | The group includes any type of thin-fried slices or sticks of potatoes, or similar crunchy products obtained by cereal doughs or vegetables, used as snack. |
| UIL.21.13431 | American Garden Popcorn Butter | Food | RPC Derivatives | A00DC | Popcorn (maize, popped) | The group includes any type of Popcorn (popped maize) made by popping/puffing maize grains. |
| UIL.21.14389 | Popcorn Cheese / American Garden | Food | Composites | A00DC#F04.A02QE | Popcorn (maize, popped), INGREDIENT = Cheese | The group includes any type of Popcorn (popped maize) made by popping/puffing maize grains. |
| UIL.21.14560 | Sohar Chips | Food | Composites | A011L | Potato crisps or sticks | The group includes any type of Potato crisps (also known as chips in American English), made of thin slices of potatoes or potato-based doughs, included those in form of small sticks. |
| UIL.21.14383 | Lay's (Salt) | Food | Composites | A011L#F10.A0CJK | Potato crisps or sticks, QUALITATIVE-INFO = With added salt | The group includes any type of Potato crisps (also known as chips in American English), made of thin slices of potatoes or potato-based doughs, included those in form of small sticks. |
| UIL.21.14385 | potato chips ready salted | Food | Composites | A011L#F10.A0CJF | Potato crisps or sticks, QUALITATIVE-INFO = Salt (sodium)-related info | The group includes any type of Potato crisps (also known as chips in American English), made of thin slices of potatoes or potato-based doughs, included those in form of small sticks. |
| UIL.21.14386 | chips Oman | Food | Composites | A011L | Potato crisps or sticks | The group includes any type of Potato crisps (also known as chips in American English), made of thin slices of potatoes or potato-based doughs, included those in form of small sticks. |
| UIL.21.13833 | vanilla ice cream (Igloo) | Food | Composites | A02QA#F04.A06VS | Ice cream, milk-based, INGREDIENT = Vanilla flavour | The group includes any type of Ice cream, milk-based (no milk-imitate-based). |
| UIL.21.13832 | vanilla ice cream (Mazoon) | Food | Composites | A02QA#F04.A06VS | Ice cream, milk-based, INGREDIENT = Vanilla flavour | The group includes any type of Ice cream, milk-based (no milk-imitate-based). |
| UIL.21.13299 | NESTLE Chocapic | Food | Composites | A00EL#F04.A06MF | Mixed breakfast cereals, INGREDIENT = Chocolate flavour | The group includes any type of Mixed breakfast cereals, including mixed muesli, usually made by cereal grains mixed with other ingredients, like raisins, chocolate, nuts and dried fruit. |
| UIL.21.13300 | KELLOGG'S Coco Pops | Food | Composites | A00EL#F04.A06MF | Mixed breakfast cereals, INGREDIENT = Chocolate flavour | The group includes any type of Mixed breakfast cereals, including mixed muesli, usually made by cereal grains mixed with other ingredients, like raisins, chocolate, nuts and dried fruit. |
| UIL.21.14387 | Kellogg's special (cereal) | Food | Composites | A00EL | Mixed breakfast cereals | The group includes any type of Mixed breakfast cereals, including mixed muesli, usually made by cereal grains mixed with other ingredients, like raisins, chocolate, nuts and dried fruit. |
| **Sample ID (from lab)** | **Name of Product & Brand** | **Food Item** | **FOOD TYPE FE2** | **FoodEx2 Code** | **FoodEx2 Description** | **Description** |
| UIL.21.13298 | Nestle Gold Corn Flakes | Food | Composites | A00EL | Mixed breakfast cereals | The group includes any type of Mixed breakfast cereals, including mixed muesli, usually made by cereal grains mixed with other ingredients, like raisins, chocolate, nuts and dried fruit. |
| UIL.21.13459 | Original Oreo | Food | Composites | A009Z | Biscuits, chocolate | The group includes any type of cocoa powder-based biscuits. This term should not be used for chocolate filled biscuits and biscuits containing pieces of chocolate. |
| UIL.21.13457 | Lotus Biscoff | Food | Composites | A009V | Biscuits | The group includes any type of Biscuits and cookies (sweet and semi-sweet). |
| UIL.21.13453 | Tiffany Crunch And Cream | Food | Composites | A00AE | Biscuit with inclusions, filling or coating | The group includes any type of filled biscuit, i.e. biscuits with inclusions, filling or coating such as American cookies. |
| UIL.21.13452 | Nutro Chocolate Flavoured Cream Wafers | Food | Composites | A0BYR#F04.A034L | Wafers, INGREDIENT = Cream chocolate | The group includes any type of plain wafers (i.e. without inclusions, fillings or coatings) and wafer-based biscuits. |
| UIL.21.13451 | Britannia Chocolate Flavoured Premium Crème Wafer | Food | Composites | A0BYR#F04.A034L | Wafers, INGREDIENT = Cream chocolate | The group includes any type of plain wafers (i.e. without inclusions, fillings or coatings) and wafer-based biscuits. |
| UIL.21.13460 | Americana Premium Butter Cookies | Food | Composites | A009Y | Butter biscuits | The group includes any type of Butter biscuits such as småkage and Danish cookies. |
| UIL.21.14567 | Switz Mini Cup Cake Vanilla | Food | Composites | A00AN#F04.A019H | Cakes, INGREDIENT = Vanilla | The group includes any type of cake, i.e. sweets generally constituted by baked sweet dough/batter and possibly containing creams or fillings of different nature, regardless the size. |
| UIL.21.14566 | Atyab Twin Cake Vanilla | Food | Composites | A00AN#F04.A019H | Cakes, INGREDIENT = Vanilla | The group includes any type of cake, i.e. sweets generally constituted by baked sweet dough/batter and possibly containing creams or fillings of different nature, regardless the size. |
| UIL.21.13461 | Danish Butter Cookies | Food | Composites | A009Y | Butter biscuits | The group includes any type of Butter biscuits such as småkage and Danish cookies. |
| UIL.21.13449 | Tiffany Everyday Nice (Sugar Sprinkled Coconut Biscuits) | Food | Composites | A009V#F28.A07HN$F04.A014K$F04.A032H | Biscuits, PROCESS = Sugar coating, INGREDIENT = Coconuts, INGREDIENT = Sucrose (common sugar) | The group includes any type of Biscuits and cookies (sweet and semi-sweet). |
| UIL.21.13448 | Tiffany Glucose (Milk and Honey Biscuits) | Food | Composites | A009V#F04.A06PQ$F04.A02LT | Biscuits, INGREDIENT = Honey flavour, INGREDIENT = Milk | The group includes any type of Biscuits and cookies (sweet and semi-sweet). |
| **Sample ID (from lab)** | **Name of Product & Brand** | **Food Item** | **FOOD TYPE FE2** | **FoodEx2 Code** | **FoodEx2 Description** | **Description** |
| UIL.21.13447 | Nabil Nice (sugar sprinkled coconut biscuits) | Food | Composites | A009V#F28.A07HN$F04.A014K$F04.A032H | Biscuits, PROCESS = Sugar coating, INGREDIENT = Coconuts, INGREDIENT = Sucrose (common sugar) | The group includes any type of Biscuits and cookies (sweet and semi-sweet). |
| UIL.21.13446 | Nabil cream wafers (chocolate flavour) | Food | Composites | A0BYR#F04.A034L | Wafers, INGREDIENT = Cream chocolate | The group includes any type of plain wafers (i.e. without inclusions, fillings or coatings) and wafer-based biscuits. |
| UIL.21.17407 | Donut (Switz) | Food | Composites | A00BR | Doughnuts-berliner | The group includes any type of Doughnuts-berliner, usually consisting of a fried sweet dough. Baked (not fried) variants are also present on the market. |
| UIL.21.17405 | Apple puff (Lusine) | Food | Composites | A00CJ#F04.A01DJ | Various pastry, INGREDIENT = Apples | The group includes various pastries not listed elsewhere. |
| UIL.21.14574 | 7 days mini croissant | Food | Composites | A00BM | Croissant | The group includes any type of Croissant, made of a layered yeast-leavened dough with unspecified filling (eventually also without). |
| UIL.21.14552 | Apple pastry | Food | Composites | A00CJ#F04.A01DJ | Various pastry, INGREDIENT = Apples | The group includes various pastries not listed elsewhere. |
| UIL.21.13445 | Nabil glucose | Food | Composites | A009V | Biscuits | The group includes any type of Biscuits and cookies (sweet and semi-sweet). |
| UIL.21.14568 | Chocolate jumbo croissant | Food | Composites | A00BN | Croissant, filled with chocolate | The group includes any type of Croissant, filled with chocolate. |
| UIL.21.17531 | Croissant (Dhahabi) | Food | Composites | A00BM | Croissant | The group includes any type of Croissant, made of a layered yeast-leavened dough with unspecified filling (eventually also without). |
| UIL.21.17406 | Cheese Puff (Lusine) | Food | Composites | A00CJ#F04.A02QE | Various pastry, INGREDIENT = Cheese | The group includes various pastries not listed elsewhere. |
| UIL.21.13548 | Almarai Strawberry Laban | Drink | RPC Derivatives | A02NQ#F04.A06TV | Yoghurt drinks, including sweetened and/or flavoured variants, INGREDIENT = Strawberry flavour | The group includes any type of Yoghurt drinks (liquid consistency), including sweetened and/or flavoured variants. Flavouring may be considered as minor ingredient. |
| UIL.21.13547 | Mazoon Strawberry Laban | Drink | RPC Derivatives | A02NQ#F04.A06TV | Yoghurt drinks, including sweetened and/or flavoured variants, INGREDIENT = Strawberry flavour | The group includes any type of Yoghurt drinks (liquid consistency), including sweetened and/or flavoured variants. Flavouring may be considered as minor ingredient. |
| **Sample ID (from lab)** | **Name of Product & Brand** | **Food Item** | **FOOD TYPE FE2** | **FoodEx2 Code** | **FoodEx2 Description** | **Description** |
| UIL.21.13592 | Fresh Labneh, Full Fat Al-Marai | Food | RPC Derivatives | A16GH#F10.A077A | Strained yoghurt, QUALITATIVE-INFO = Full fat | The group includes any type of Strained yoghurt, i.e. yogurt that has been strained to remove its whey, resulting in a thicker consistency than unstrained yogurt. For example: Greek yoghurt, Labneh and Yogurt cheese are included in this group. The part consumed/analysed is by default the whole or a portion of it representing the observed heterogeneity. |
| UIL.21.13594 | Fresh Labneh: Full Fat Mazoon | Food | RPC Derivatives | A16GH#F10.A077A | Strained yoghurt, QUALITATIVE-INFO = Full fat | The group includes any type of Strained yoghurt, i.e. yogurt that has been strained to remove its whey, resulting in a thicker consistency than unstrained yogurt. For example: Greek yoghurt, Labneh and Yogurt cheese are included in this group. The part consumed/analysed is by default the whole or a portion of it representing the observed heterogeneity. |
| UIL.21.13593 | Labneh Turkish Recipe: Puck | Food | RPC Derivatives | A16GH | Strained yoghurt | The group includes any type of Strained yoghurt, i.e. yogurt that has been strained to remove its whey, resulting in a thicker consistency than unstrained yogurt. For example: Greek yoghurt, Labneh and Yogurt cheese are included in this group. The part consumed/analysed is by default the whole or a portion of it representing the observed heterogeneity. |
| UIL.21.13558 | Fresh Yougurt Full Fat: Al-Marai | Drink | RPC Derivatives | A02NE#F10.A077A$F10.A166Y | Yoghurt, QUALITATIVE-INFO = Full fat, QUALITATIVE-INFO = Fresh | The group includes any type of Yoghurt. |
| UIL.21.13555 | Mazoon Fresh Yoghurt Full Fat | Food | RPC Derivatives | A02NE#F10.A077A$F10.A166Y | Yoghurt, QUALITATIVE-INFO = Full fat, QUALITATIVE-INFO = Fresh | The group includes any type of Yoghurt. |
| UIL.21.13559 | Youghurt;Full Cream AlRawabi | Drink | RPC Derivatives | A02NE#F10.A077A | Yoghurt, QUALITATIVE-INFO = Full fat | The group includes any type of Yoghurt. |
| UIL.21.13556 | Fresh Yougurt Full Fat: Al-Safwah | Drink | RPC Derivatives | A02NE#F10.A077A$F10.A166Y | Yoghurt, QUALITATIVE-INFO = Full fat, QUALITATIVE-INFO = Fresh | The group includes any type of Yoghurt. |
| UIL.21.13542 | Mazoon Fresh Laban Full Fat | Drink | RPC Derivatives | A02MV#F10.A077A$F10.A166Y | Buttermilk, QUALITATIVE-INFO = Full fat, QUALITATIVE-INFO = Fresh | The group includes any type of Buttermilk. |
| UIL.21.17403 | Activia Full Fat Fresh Laban | Drink | RPC Derivatives | A02NN | Yoghurt, goat milk, plain | The group includes any type of Yoghurt. |
| **Sample ID (from lab)** | **Name of Product & Brand** | **Food Item** | **FOOD TYPE FE2** | **FoodEx2 Code** | **FoodEx2 Description** | **Description** |
| UIL.21.13557 | Yoghurt: Full Cream Unikai | Food | RPC Derivatives | A02NE#F10.A077A | Yoghurt, QUALITATIVE-INFO = Full fat | The group includes any type of Yoghurt. |
| UIL.21.13544 | Almarai Fresh Laban Full Fat | Drink | RPC Derivatives | A02MV#F10.A077A$F10.A166Y | Buttermilk, QUALITATIVE-INFO = Full fat, QUALITATIVE-INFO = Fresh | The group includes any type of Buttermilk. |
| UIL.21.13543 | Laban Fresh Full Cream (Asafwah) | Drink | RPC Derivatives | A02MV#F10.A077A$F10.A166Y | Buttermilk, QUALITATIVE-INFO = Full fat, QUALITATIVE-INFO = Fresh | The group includes any type of Buttermilk. |
| UIL.21.13545 | Almarai Laban Up | Drink | RPC Derivatives | A02MV | Buttermilk | The group includes any type of Buttermilk. |
| UIL.21.13539 | Fresh Laban (Alrawabi) | Drink | RPC Derivatives | A02MV#F10.A166Y | Buttermilk, QUALITATIVE-INFO = Fresh | The group includes any type of Buttermilk. |
| UIL.21.13541 | Laban Up (Alsafwa) | Drink | RPC Derivatives | A02MV | Buttermilk | The group includes any type of Buttermilk. |
| UIL.21.13540 | Mazoon Laban Up | Drink | RPC Derivatives | A02MV | Buttermilk | The group includes any type of Buttermilk. |
| UIL.21.17409 | Activia Full Fat Plain Yoghurt | Food | RPC Derivatives | A02NE#F10.A077A | Yoghurt, QUALITATIVE-INFO = Full fat | The group includes any type of Yoghurt. |
| UIL.21.14131 | Cream (Luna) | Food | RPC Derivatives | A02MK | Cream and cream products | The group includes any type of Cream, i.e. the portion of milk with enhanced fat content, usually obtained by centrifugal separation of the skim milk. |
| UIL.21.13546 | Alrawabi Up: Laban Drink | Drink | RPC Derivatives | A02MV | Buttermilk | The group includes any type of Buttermilk. |
| UIL.21.13549 | Laban Drink (Unikai) | Drink | RPC Derivatives | A02MV | Buttermilk | The group includes any type of Buttermilk. |
| UIL.21.14180 | Mazoon Sambharam Spicy Laban Drink | Drink | RPC Derivatives | A02MV#F10.A0EZY | Buttermilk, QUALITATIVE-INFO = Hot/piquant/spicy | The group includes any type of Buttermilk. |
| UIL.21.14179 | Laban Drinks (Alkhamayil) | Drink | RPC Derivatives | A02MV | Buttermilk | The group includes any type of Buttermilk. |
| UIL.21.17404 | Balade Farms Ayran Original Laban | Drink | RPC Derivatives | A02MV | Buttermilk | The group includes any type of Buttermilk. |
| UIL.21.14553 | Cream (Puck) | Food | RPC Derivatives | A02MK | Cream and cream products | The group includes any type of Cream, i.e. the portion of milk with enhanced fat content, usually obtained by centrifugal separation of the skim milk. |
| UIL.21.13830 | Nestle cream | Food | RPC Derivatives | A02MK | Cream and cream products | The group includes any type of Cream, i.e. the portion of milk with enhanced fat content, usually obtained by centrifugal separation of the skim milk and eventual adjustment of the final fat content. |
| UIL.21.14572 | Chedder cheese (Almarai) | Food | RPC Derivatives | A02YK | Cheese, cheddar | The group includes any type of cheddar cheese, a type of hard cheese. |
| **Sample ID (from lab)** | **Name of Product & Brand** | **Food Item** | **FOOD TYPE FE2** | **FoodEx2 Code** | **FoodEx2 Description** | **Description** |
| UIL.21.13835 | Haloumi Pinar | Food | RPC Derivatives | A065R | Halloumi | The group includes any type of halloumi, a Cypriot semi-hard, unripened brined cheese made from a mixture of goat's and sheep's milk, and sometimes also cow's milk. Often consumed fried or grilled. |
| UIL.21.14571 | Chedder cheese (Kraft) | Food | RPC Derivatives | A02YK | Cheese, cheddar | The group includes any type of cheddar cheese, a type of hard cheese. |
| UIL.21.13840 | Almarai Burger Slice Cheese | Food | RPC Derivatives | A031B | Processed cheese, sliceable | The group includes any type of Processed cheese, sliceable. |
| UIL.21.13839 | Kraft Slice Cheese Original | Food | RPC Derivatives | A031B | Processed cheese, sliceable | The group includes any type of Processed cheese, sliceable. The ingredients added to melt and eventually flavour the product may be considered minor ingredients. |
| UIL.21.13834 | Haloumi Cheese Al-Marai | Food | RPC Derivatives | A065R | Halloumi | The group includes any type of halloumi, a Cypriot semi-hard, unripened brined cheese made from a mixture of goat's and sheep's milk, and sometimes also cow's milk. |
| UIL.21.13848 | Kraft Cheddar Cheese Spread Original | Food | RPC Derivatives | A031C#F04.A02YK | Processed cheese, spreadable, INGREDIENT = Cheese, cheddar | The group includes any type of Processed cheese, spreadable. The ingredients added to melt and eventually flavour the product may be considered minor ingredients. |
| UIL.21.13844 | Almarai Cream Cheese Cheddar | Food | RPC Derivatives | A02QZ#F04.A02YK | Cream cheese, INGREDIENT = Cheese, cheddar | The group includes any type of Cream cheese, a fresh cheese with creamy texture, such as philadelfia or boursin. |
| UIL.21.13838 | Cheese Triangles Puck | Food | RPC Derivatives | A02QE | Cheese | The group includes any type of cheese and some additional products similar to cheese, like mascarpone and clotted cream. Cheese is produced through the coagulation of milk protein (casein), which is separated from the milk’s whey. |
| UIL.21.13837 | Cheese Triangles Al Maraai | Food | RPC Derivatives | A02QE | Cheese | The group includes any type of Cheese and some additional products similar to cheese, like mascarpone and clotted cream. Cheese is produced through the coagulation of milk protein (casein), which is separated from the milk’s whey. |
| UIL.21.13847 | Puck Cream Cheese | Food | RPC Derivatives | A02QZ | Cream cheese | The group includes any type of Cream cheese, a fresh cheese with creamy texture, such as philadelfia or boursin. |
| UIL.21.13846 | Puck Cream Cheese Cheddar | Food | RPC Derivatives | A02QZ#F04.A02YK | Cream cheese, INGREDIENT = Cheese, cheddar | The group includes any type of Cream cheese, a fresh cheese with creamy texture, such as philadelfia or boursin. |
| UIL.21.13836 | Triangle Cheese Abu Alwald | Food | RPC Derivatives | A02QE | Cheese | The group includes any type of Cheese and some additional products similar to cheese, like mascarpone and clotted cream. Cheese is produced through the coagulation of milk protein (casein), which is separated from the milk’s whey. |
| UIL.21.13845 | Almarai Cream Cheese | Food | RPC Derivatives | A02QZ | Cream cheese | The group includes any type of Cream cheese, a fresh cheese with creamy texture, such as philadelfia or boursin. |
| **Sample ID (from lab)** | **Name of Product & Brand** | **Food Item** | **FOOD TYPE FE2** | **FoodEx2 Code** | **FoodEx2 Description** | **Description** |
| UIL.21.14554 | Pinar Processed Cream Cheese Spread | Food | RPC Derivatives | A031C#F10.A077F | Processed cheese, spreadable, QUALITATIVE-INFO = Single cream | The group includes any type of Processed cheese, spreadable. The ingredients added to melt and eventually flavour the product may be considered minor ingredients. |
| UIL.21.13841 | Puck Slice Cheese Original | Food | RPC Derivatives | A031B | Processed cheese, sliceable | The group includes any type of Processed cheese, sliceable. The ingredients added to melt and eventually flavour the product may be considered minor ingredients. |
| UIL.21.13843 | Mazoon Spread Cheese | Food | RPC Derivatives | A031C | Processed cheese, spreadable | The group includes any type of Processed cheese, spreadable. The ingredients added to melt and eventually flavour the product may be considered minor ingredients. |
| UIL.21.13842 | Mazoon Spread Cheese Cheddar | Food | RPC Derivatives | A031C#F04.A02YK | Processed cheese, spreadable, INGREDIENT = Cheese, cheddar | The group includes any type of Processed cheese, spreadable. The ingredients added to melt and eventually flavour the product may be considered minor ingredients. |
| UIL.21.13456 | Britannia Toastea Wheat Rusk | Food | Composites | A006M#F04.A003X | Rusk, INGREDIENT = Wheat flour | The group includes any type of Rusk, which is a sweet sliced bread browned in an oven. |
| UIL.21.13455 | Tiffany Whole Wheat Rusks | Food | Composites | A006M#F04.A003X$F10.A06HR | Rusk, INGREDIENT = Wheat flour, QUALITATIVE-INFO = Integral /not refined | The group includes any type of Rusk, which is a sweet sliced bread browned in an oven. |
| UIL.21.13429 | Indomie Fried Noodles | Food | Composites | A007R#F28.A07GR | Asian-style noodles other than glass noodles, PROCESS = Frying | The group covers any type of Asian-style noodles other than glass noodles (transparent noodles). |
| UIL.21.14573 | Family Corned Beef | Food | Composites | A0B9G | Corned beef, cooked | The group includes any type of Corned beef, cooked. |
| UIL.21.14202 | Al-Islami Ground Beef | Food | RPC Derivatives | A023C | Ham, beef | The group includes any type of Ham from beef, usually made by curing bovine meat. |
| UIL.21.14201 | Corned Beef (Taybat) | Food | Composites | A0B9G | Corned beef, cooked | The group includes any type of Corned beef, cooked. |
| UIL.21.14205 | Al-Safa Chicken Franks | Food | Composites | A024F#F04.A04DS | Sausages, INGREDIENT = Chicken, minced meat | The group includes any type of Sausages, i.e. more or less coarse mixtures of lean meats, fatty tissues and other ingredients, often filled into casings. |
| UIL.21.14200 | Beef Burger (Taybat) | Food | Composites | A03ZL | Hamburger with bread | The group includes any type of Hamburger sandwich, i.e. hamburger meat with bread. |
| UIL.21.14204 | Americana Beef Hot dog | Food | Composites | A024F#F04.A0EYM | Sausages, INGREDIENT = Charcuterie meat products | The group includes any type of Hot dog with bread, usually consisting in a cooked sausage stuffed in a sliced bun. |
| UIL.21.14198 | Sadia Chicken Burger | Food | Composites | A03XF#F04.A04DS | Meat burger (no sandwich), INGREDIENT=Chicken, minced meat | The group includes any type of Meat burger (no sandwich), i.e. patties of ground meat. |
| **Sample ID (from lab)** | **Name of Product & Brand** | **Food Item** | **FOOD TYPE FE2** | **FoodEx2 Code** | **FoodEx2 Description** | **Description** |
| UIL.21.14203 | Al-Kabeer Jumbo Hot Dogs | Food | Composites | A024F | Sausages | The group includes any type of Sausages, i.e. mixtures of lean meats, fatty tissues often filled into casings. |
| UIL.21.14194 | Al-Safa Breaded Chicken Finger | Food | Composites | A04DS#F28.A07HK | Chicken, minced meat, PROCESS = Breading | The group includes any type of chicken/fowl minced meat. |
| UIL.21.14206 | Sadia Chicken Franks | Food | Composites | A024F#F04.A04DS | Sausages, INGREDIENT = Chicken, minced meat | The group includes any type of Sausages, i.e. more or less coarse mixtures of lean meats, fatty tissues and other ingredients, often filled into casings. |
| UIL.21.14199 | Beef Burger Sadia | Food | Composites | A03ZL | Hamburger with bread | The group includes any type of Hamburger sandwich, i.e. hamburger meat with bread. |
| UIL.21.14195 | Sadia Chicken Nuggets Crispy | Food | Composites | A04DS#F28.A07HK | Chicken, minced meat, PROCESS = Breading | The group includes any type of chicken/fowl minced meat. |
| UIL.21.14196 | Al-Safa Chicken Burger | Food | Composites | A03XF#F04.A04DS | Meat burger (no sandwich), INGREDIENT = Chicken, minced meat | The group includes any type of Meat burger (no sandwich), i.e. patties of ground meat. |
| UIL.21.13292 | Tuna Alalali In Water | Food | RPC Derivatives | A0FBT#F28.A07GN | Canned tunas and similar, PROCESS = Bain-marie cooking (in water bath) | The group includes any type of Canned tunas and similar. |
| UIL.21.13294 | Skipjack Tuna California Garden In Sun Flower Oil | Food | RPC Derivatives | A0FBT#F27.A02EF$F04.A015F | Canned tunas and similar, SOURCE-COMMODITIES = Tuna, skipjack, INGREDIENT = Oilseeds | The group includes any type of Canned tunas and similar. |
| UIL.21.13295 | Light Chunks Tuna California Garden In Water | Food | RPC Derivatives | A0FBT#F28.A07KT$F28.A07GN | Canned tunas and similar, PROCESS = Portioning, PROCESS = Bain-marie cooking (in water bath) | The group includes any type of Canned tunas and similar. |
| UIL.21.13291 | Skipjack Tuna Alalali In Sun Flower Oil | Food | RPC Derivatives | A0FBT#F27.A02EF$F04.A015F | Canned tunas and similar, SOURCE-COMMODITIES = Tuna, skipjack, INGREDIENT = Oilseeds | The group includes any type of Canned tunas and similar. |
| UIL.21.13293 | White Tuna Meat In Sun Flower Oil Delmonte | Food | RPC Derivatives | A0FBT#F04.A015L$F10.A0F2R | Canned tunas and similar, INGREDIENT = Sunflower seeds, QUALITATIVE-INFO = White | The group includes any type of Canned tunas and similar. |
| UIL.21.13434 | White Tuna Meat In Brine | Food | RPC Derivatives | A0FBT#F28.A07KC$F10.A0F2R | Canned tunas and similar, PROCESS = Pickling, QUALITATIVE-INFO = White | The group includes any type of Canned tunas and similar. |
| UIL.21.14397 | Diamond Strawberry Jam | Food | Composites | A01MN | Jam, strawberries | The group includes any type of Jam obtained from Strawberries. |
| **Sample ID (from lab)** | **Name of Product & Brand** | **Food Item** | **FOOD TYPE FE2** | **FoodEx2 Code** | **FoodEx2 Description** | **Description** |
| UIL.21.14405 | Mango Thokku Pickle In Oil / Priya | Food | Composites | A046C#F04.A015F | Mango pickle, INGREDIENT = Oilseeds | The group includes any type of Mango pickle. |
| UIL.21.14404 | Tomato Paste / Alalali | Food | RPC Derivatives | A00ZF | Tomato paste | The group includes any type of Tomato paste or concentrate. The part consumed/analysed is by default the whole or a portion of it representing the observed heterogeneity. |
| UIL.21.13278 | Baked Beans California Garden | Food | RPC Derivatives | A01BB#F28.A07GX | Canned or jarred common beans, PROCESS = Baking | The group includes any type of canned or jarred common beans. |
| UIL.21.14399 | Tomato Paste / Almudhish | Food | RPC Derivatives | A00ZF | Tomato paste | The group includes any type of Tomato paste or concentrate. The part consumed/analysed is by default the whole or a portion of it representing the observed heterogeneity. |
| UIL.21.13276 | Green Giant Sweet Corn | Food | RPC Derivatives | A00ZP | Sweet corn canned | The group includes any type of Sweet corn canned. |
| UIL.21.13290 | Sweet Corn American Garden | Food | RPC Derivatives | A00ZP | Sweet corn canned | The group includes any type of Sweet corn canned. |
| UIL.21.13282 | Baked Beans Almazraa | Food | RPC Derivatives | A01BB#F28.A07GX | Canned or jarred common beans, PROCESS = Baking | The group includes any type of canned or jarred common beans. |
| UIL.21.14400 | Tomato Paste / Jumbo | Food | RPC Derivatives | A00ZF | Tomato paste | The group includes any type of Tomato paste or concentrate. The part consumed/analysed is by default the whole or a portion of it representing the observed heterogeneity. |
| UIL.21.14556 | Luna Baked Beans In Tomato Sauce | Food | RPC Derivatives | A01BB#F28.A07GX$F04.A044C | Canned or jarred common beans, PROCESS = Baking, INGREDIENT = Tomato-containing cooked sauces | The group includes any type of canned or jarred common beans. |
| UIL.21.13280 | Sweet Corn California Garden | Food | RPC Derivatives | A00ZP | Sweet corn canned | The group includes any type of Sweet corn canned. |
| UIL.21.14559 | Peas processed | Food | RPC Derivatives | A012G#F28.A0C0R | Peas (without pods) and similar-, PROCESS = Processed | The group includes Peas, also known as green pea, or similar legumes |
| UIL.21.14555 | La Ming Beans In Tomato Sauce | Food | RPC Derivatives | A01BB#F04.A044C | Canned or jarred common beans, INGREDIENT = Tomato-containing cooked sauces | The group includes any type of canned or jarred common beans. |
| UIL.21.13288 | Sweet Corn Libbys | Food | RPC Derivatives | A00ZP | Sweet corn canned | The group includes any type of Sweet corn canned. |
| UIL.21.13279 | Processed Peas California Garden | Food | RPC Derivatives | A012G#F28.A0C0R | Peas (without pods) and similar-, PROCESS = Processed | The group includes Peas, also known as green pea, or similar legumes |
| **Sample ID (from lab)** | **Name of Product & Brand** | **Food Item** | **FOOD TYPE FE2** | **FoodEx2 Code** | **FoodEx2 Description** | **Description** |
| UIL.21.13287 | Processed Peas Almazraa | Food | RPC Derivatives | A012G#F28.A0C0R | Peas (without pods) and similar-, PROCESS = Processed | The group includes Peas, also known as green pea, or similar legumes |
| UIL.21.14557 | Foul Medammas (American Garden) | Food | RPC Derivatives | A012A#F28.A0BYP | Broad beans (without pods), PROCESS = Canning / jarring | Legumes without pod from the plant classified under the species Vicia faba L. (any subspp. and var.), commonly known as Broad beans or Fava beans or Horse beans or Tic beans. |
| UIL.21.14558 | Lunafoul Medames Extra Grade Fava Beans | Food | RPC Derivatives | A012A#F28.A0BYP | Broad beans (without pods), PROCESS = Canning / jarring | Legumes without pod from the plant classified under the species Vicia faba L. (any subspp. and var.), commonly known as Broad beans or Fava beans or Horse beans or Tic beans. |
| UIL.21.13277 | Plain Medammes California Garden | Food | RPC Derivatives | A012A#F28.A0BYP | Broad beans (without pods), PROCESS = Canning / jarring | Legumes without pod from the plant classified under the species Vicia faba L. (any subspp. and var.), commonly known as Broad beans or Fava beans or Horse beans or Tic beans. |
| UIL.21.13281 | Chick Peas California Garden | Food | RPC Derivatives | A01BE | Canned or jarred chickpea | The group includes any type of canned or jarred chick pea. |
| UIL.21.13286 | Chick Peas Almazraa | Food | RPC Derivatives | A01BE | Canned or jarred chickpea | The group includes any type of canned or jarred chick pea. |
| UIL.21.13283 | Foul Medamas Almazraa | Food | RPC Derivatives | A012A#F28.A0BYP | Broad beans (without pods), PROCESS = Canning / jarring | Legumes without pod from the plant classified under the species Vicia faba L. (any subspp. and var.), commonly known as Broad beans or Fava beans or Horse beans or Tic beans. |
| UIL.21.13284 | Chick Peas Luna | Food | RPC Derivatives | A01BE | Canned or jarred chickpea | The group includes any type of canned or jarred chick pea. |
| UIL.21.13289 | Boildchick Peas Mara | Food | RPC Derivatives | A01BE#F28.A07GL | Canned or jarred chickpea, PROCESS = Boiling | The group includes any type of canned or jarred chick pea. |
| UIL.21.13285 | Green Peas Luna | Food | RPC Derivatives | A01BC#F10.A0F2Q | Canned or jarred peas, QUALITATIVE-INFO = Green | The group includes any type of canned or jarred peas. |
| UIL.21.14403 | Mango Pickles In Oil / Ahmed | Food | Composites | A046C#F04.A015F | Mango pickle, INGREDIENT = Oilseeds | The group includes any type of Mango pickle. |
| UIL.21.14406 | Mango Pickle / Aeroplane | Food | Composites | A046C | Mango pickle | The group includes any type of Mango pickle. |
| UIL.21.14394 | American Garden BBQ Sauce Original | Food | Composites | A045B#F02.A0EPG | Barbecue or steak sauces, PART-NATURE = BBQ-type sauces (as part-nature) | The group includes any type of Barbecue sauce or steak sauces, usually used as condiment or marinade for grilled/barbecued meat. |
| UIL.21.14395 | Heinz Classic BBQ Smokey And Rich | Food | Composites | A045B#F02.A0EPG | Barbecue or steak sauces, PART-NATURE = BBQ-type sauces (as part-nature) | The group includes any type of Barbecue sauce or steak sauces, usually used as condiment or marinade for grilled/barbecued meat. |
| UIL.21.14411 | Tomato Ketchup/ Jumbo | Food | Composites | A044P | Tomato ketchup and related sauces | The group includes any type of Tomato ketchup (typically made from tomatoes, a sweetener, vinegar) and derived sauces. |
| UIL.21.14413 | Tomato Ketchup / Heinz | Food | Composites | A044P | Tomato ketchup and related sauces | The group includes any type of Tomato ketchup (typically made from tomatoes, a sweetener, vinegar) and derived sauces. |
| **Sample ID (from lab)** | **Name of Product & Brand** | **Food Item** | **FOOD TYPE FE2** | **FoodEx2 Code** | **FoodEx2 Description** | **Description** |
| UIL.21.14408 | Tomato Ketchup / Hayat | Food | Composites | A044P | Tomato ketchup and related sauces | The group includes any type of Tomato ketchup (typically made from tomatoes, a sweetener, vinegar) and derived sauces. |
| UIL.21.14392 | Delicio French Dressing | Food | Composites | A045K | Salad dressing | The group includes any type of Salad dressing. |
| UIL.21.14393 | Delicio 1000 Island | Food | Composites | A045K | Salad dressing | The group includes any type of Salad dressing. |
| UIL.21.14402 | Hot Sauce / Excellence | Food | Composites | A044Q | Tabasco sauce | The group includes any type of Tabasco sauce, i.e. a sauce based on tabasco peppers |
| UIL.21.13430 | Maggi Chicken Stock | Food | Composites | A043G | Stock cubes or granulate, chicken | The group includes any type of chicken stock cubes or granulate. |
| UIL.21.14407 | Pizza Sauce Olive& Mushrooms / Alalali | Food | Composites | A044C#F04.A01BP$F04.A06RJ | Tomato-containing cooked sauces, INGREDIENT = Table olives, INGREDIENT = Mushroom flavour | The group includes any type of Tomato-containing cooked sauce |
| UIL.21.14415 | Classic Mayonnaise / Mazola | Food | Composites | A044X | Mayonnaise sauce | The group includes any type of Mayonnaise sauce, usually made with vegetable oil and egg yolk. |
| UIL.21.14416 | Creamy Classic Mayonnaise / Heinz | Food | Composites | A044X | Mayonnaise sauce | The group includes any type of Mayonnaise sauce, usually made with vegetable oil and egg yolk. |
| UIL.21.14401 | Tabasco Hot Sauce | Food | Composites | A044Q | Tabasco sauce | The group includes any type of Tabasco sauce, i.e. a sauce based on tabasco peppers |
| UIL.21.14398 | Soy Sauce Classic / American Garden | Food | Composites | A044R | Soy sauce | The group includes any type of Soy sauce (Soya sauce, Tamari), made from fermented soybeans and other ingredients |
| UIL.21.14417 | Hot Sause / American Garden | Food | Composites | A044Q | Tabasco sauce | The group includes any type of Tabasco sauce, i.e. a sauce based on tabasco peppers |
| UIL.21.13296 | Hayat Hot Sauce | Food | Composites | A044Q | Tabasco sauce | The group includes any type of Tabasco sauce, i.e. a sauce based on tabasco peppers |
| UIL.21.13297 | Jumbo Hot Sauce | Food | Composites | A044Q | Tabasco sauce | The group includes any type of Tabasco sauce, i.e. a sauce based on tabasco peppers |
| UIL.21.14564 | Maggi Beef Flavour | Food | Composites | A043H | Stock cube or granulate, beef | The group includes any type of beef stock cubes or granulate. |
| UIL.21.14565 | Maggi Chicken Stock Less Salt | Food | Composites | A043G#F10.A0B8M | Stock cubes or granulate, chicken, QUALITATIVE-INFO = Low sodium / reduced salt | The group includes any type of chicken stock cubes or granulate |
| UIL.21.14561 | Knour CHICKEN Stock | Food | Composites | A043G | Stock cubes or granulate, chicken | The group includes any type of chicken stock cubes or granulate |
| UIL.21.14562 | Knour Beef Flavoured Stock | Food | Composites | A043H | Stock cube or granulate, beef | The group includes any type of beef stock cubes or granulate. |
| UIL.21.14563 | Knour Vegetable Stock Cubes | Food | Composites | A043J | Stock cubes or granulate, vegetables | The group includes any type of vegetable stock cubes or granulate. |
| **Sample ID (from lab)** | **Name of Product & Brand** | **Food Item** | **FOOD TYPE FE2** | **FoodEx2 Code** | **FoodEx2 Description** | **Description** |
| UIL.21.17402 | Tang (Orange) (Powder) | Food | Composites | A03FJ#F28.A07XY | Soft drink, orange flavour, PROCESS = Granulation (from powder) | The group includes any type of soft drink with orange flavour. |
| UIL.21.13850 | Al Deyafa Orange Flavour (Powder) | Food | RPC Derivatives | A03FJ#F28.A07MR | Soft drink, orange flavour, PROCESS = Reconstitution from concentrate, powder or other dehydrated form | The group includes any type of soft drink with orange flavour. |
| UIL.21.13828 | Al Deyafa Fruit Cordial | Drink | RPC Derivatives | A03AP | Juice, mixed fruit | The group includes any type of Juice from mixed fruit. |
| UIL.21.14138 | Al Rawabi Red Grape Juice | Drink | RPC Derivatives | A03AK#F10.A077K$F10.A0F2S | Juice, grape, QUALITATIVE-INFO = Without added sugar, QUALITATIVE-INFO = Red | The group includes any type of juice made from Grape including |
| UIL.21.14135 | Almarai Graps And Berries (Farms Select ) | Drink | RPC Derivatives | A03BA | Juice, berry-grape | The group includes any type of juice based on grape juice with variable amounts of more valuable berry juices. |
| UIL.21.13829 | Mango Juice Mazoon 200ml | Drink | RPC Derivatives | A039Y | Juice, mango | The group includes any type of juice made from Mango. |
| UIL.21.13827 | Natural Mango Asafwa 200ml | Drink | RPC Derivatives | A039Y | Juice, mango | The group includes any type of juice made from Mango. |
| UIL.21.14142 | Fruit Nectar (Lacnor) | Drink | Composites | A03BL | Mixed fruit nectars | The group includes any type of fruit nectars made from mixed fruit. |
| UIL.21.14132 | Al Rabie Fruit Cocktail Nectar | Drink | Composites | A03BL | Mixed fruit nectars | The group includes any type of fruit nectars made from mixed fruit. |
| UIL.21.13851 | Vimto | Drink | Composites | A03FQ | Cola-type drinks | The group includes any type of soft drinks with cola flavour, usually sweetened and carbonated. |
| UIL.21.14140 | Sun Top Orange Fruit Drink | Drink | RPC Derivatives | A03AM | Juice, orange | The group includes any type of juice made from Orange. |
| UIL.21.14134 | Al Marai Mango Juice | Drink | RPC Derivatives | A039Y | Juice, mango | The group includes any type of juice made from Mango. |
| UIL.21.13824 | Mixed Fruit Juice (Mazoon) | Drink | RPC Derivatives | A03AP | Juice, mixed fruit | The group includes any type of Juice from mixed fruit. |
| UIL.21.14143 | Fruit Drink (Orange) , Rani | Drink | RPC Derivatives | A03AM | Juice, orange | The group includes any type of juice made from Orange. |
| UIL.21.14139 | A'safwah Mixed Fruit Juice | Drink | RPC Derivatives | A03AP | Juice, mixed fruit | The group includes any type of Juice from mixed fruit. |
| UIL.21.14141 | Orange Drink (Top Fruit) | Drink | RPC Derivatives | A03AM | Juice, orange | The group includes any type of juice made from Orange. |
| UIL.21.14136 | Nada Mango Juice | Drink | RPC Derivatives | A039Y | Juice, mango | The group includes any type of juice made from Mango. |
| UIL.21.14137 | Nada Orange Juice | Drink | RPC Derivatives | A03AM | Juice, orange | The group includes any type of juice made from Orange. |
| UIL.21.13821 | Asafwa Natural Orange 200 ml | Drink | RPC Derivatives | A03AM | Juice, orange | The group includes any type of juice made from Orange. |
| UIL.21.13822 | Almarai Orange Juice 100% 300 ml | Drink | RPC Derivatives | A03AM#F10.A06HR | Juice, orange, QUALITATIVE-INFO = Integral /not refined | The group includes any type of juice made from Orange. |
| **Sample ID (from lab)** | **Name of Product & Brand** | **Food Item** | **FOOD TYPE FE2** | **FoodEx2 Code** | **FoodEx2 Description** | **Description** |
| UIL.21.13825 | Top fruit Fruit Cocktail 200ml | Drink | RPC Derivatives | A03AP | Juice, mixed fruit | The group includes any type of Juice from mixed fruit. |
| UIL.21.14133 | Al Rawabi Apple Juice | Drink | RPC Derivatives | A039M | Juice, apple | The group includes any type of juice made from Apple. |
| UIL.21.13826 | Orange No Add Sugar (Top Fruit) | Drink | RPC Derivatives | A03AM#F10.A077K | Juice, orange, QUALITATIVE-INFO = Without added sugar | The group includes any type of juice made from Orange. |
| UIL.21.13823 | Alrawabi Orange 1005juice | Drink | RPC Derivatives | A03AM#F10.A077K | Juice, orange, QUALITATIVE-INFO = Without added sugar | The group includes any type of juice made from Orange. |
| UIL.21.13450 | Galaxy Smooth Milk | Drink | RPC - Raw Primary Commodities | A02LT#F10.A0CJQ | Milk, QUALITATIVE-INFO = Soft | The group includes Milk, i.e. a white nutritious liquid secreted by mammals and used as food source by human beings. |
| UIL.21.14569 | Milk Powder (Majan) | Food | RPC Derivatives | A02PJ | Milk powder | he group includes any type of Milk powder. |
| UIL.21.14570 | Milk Powder (Almudhish) | Food | RPC Derivatives | A02PJ | Milk powder | he group includes any type of Milk powder. |
| UIL.21.13552 | Strwaberry Milk (Asafwah) | Drink | Composites | A02MP#F04.A06TV | Flavoured milks, INGREDIENT = Strawberry flavour | The group includes any type of Flavoured milk, i.e. milk containing sweetening and flavouring ingredients |
| UIL.21.13553 | Strawberry flavored milk | Drink | Composites | A02MP#F04.A06TV | Flavoured milks, INGREDIENT = Strawberry flavour | The group includes any type of Flavoured milk, i.e. milk containing sweetening and flavouring ingredients |
| UIL.21.13554 | Strawberry Fresh Milk (Alrawabi) | Drink | Composites | A02MP#F04.A06TV$F10.A166Y | Flavoured milks, INGREDIENT = Strawberry flavour, QUALITATIVE-INFO = Fresh | The group includes any type of Flavoured milk, i.e. milk containing sweetening and flavouring ingredients |
| UIL.21.14171 | Strawberry Flavored Milk (Lacnor) | Drink | Composites | A02MP#F04.A06TV | Flavoured milks, INGREDIENT = Strawberry flavour | The group includes any type of Flavoured milk, i.e. milk containing sweetening and flavouring ingredients |
| UIL.21.14170 | Strawberry Milk (Nada) | Drink | Composites | A02MP#F04.A06TV | Flavoured milks, INGREDIENT = Strawberry flavour | The group includes any type of Flavoured milk, i.e. milk containing sweetening and flavouring ingredients |
| UIL.21.14129 | Evaporated Milk (Rainbow) | Drink | RPC Derivatives | A02PG | Condensed milk (sometimes with added sugars) | The group includes any type of Condensed milk, i.e. milk with reduced water content and often added sugars (as minor ingredients). |
| UIL.21.14130 | Tea Milk (Almudhish) | Drink | Composites | A02MP#F04.A03LC | Flavoured milks, INGREDIENT = Fermented tea infusion | The group includes any type of Flavoured milk, i.e. milk containing sweetening and flavouring ingredients |
| UIL.21.13551 | Mazoon Fresh Milk Strawberry Flavour | Drink | Composites | A02MP#F04.A06TV$F10.A166Y | Flavoured milks, INGREDIENT = Strawberry flavour, QUALITATIVE-INFO = Fresh | The group includes any type of Flavoured milk, i.e. milk containing sweetening and flavouring ingredients |
| **Sample ID (from lab)** | **Name of Product & Brand** | **Food Item** | **FOOD TYPE FE2** | **FoodEx2 Code** | **FoodEx2 Description** | **Description** |
| UIL.21.13849 | Power Horse Energy | Drink | Composites | A03GA | Energy drinks | The group includes any type of Energy drinks, non-alcoholic functional beverages usually containing caffeine and other ingredients such as vitamins and taurine. |
| UIL.21.14173 | Energy drink (Red bull) | Drink | Composites | A03GA | Energy drinks | The group includes any type of Energy drinks, non-alcoholic functional beverages usually containing caffeine and other ingredients such as vitamins and taurine. |
| UIL.21.14178 | Vitaene Extra (Pokka) | Drink | Composites | A03GA#F10.A077L | Energy drinks, QUALITATIVE-INFO = Sugar free | The group includes any type of Energy drinks, non-alcoholic functional beverages usually containing caffeine and other ingredients such as vitamins and taurine. |
| UIL.21.14176 | Mountain Dew | Drink | Composites | A03FJ#F10.A0CQG | Soft drink, orange flavour, QUALITATIVE-INFO = With added caffeine | The group includes any type of soft drink with orange flavour. |
| UIL.21.14175 | Pepsi | Drink | Composites | A03FQ | Cola-type drinks | The group includes any type of soft drinks with cola flavour, usually sweetened and carbonated. Though by default cola beverages are with caffeine, also the variants without caffeine are included. |
| UIL.21.14174 | Coca cola | Drink | Composites | A03FS | Cola mix, flavoured cola | The group includes any type of Cola Mix flavoured cola, i.e. a soft drink made by mixing a fruit-flavored syrup into cola, such as Cherry cola. |
| UIL.21.14172 | Lipton Peach Ice tea | Drink | Composites | A16GP#F04.A06SB | Tea extract (liquid), INGREDIENT = Peach flavour | The group includes any type of tea extract in liquid form. The part consumed/analysed is by default the whole marketed unit or a homogeneous representative portion. |
| UIL.21.14177 | Malt beverage (Barbican) | Drink | Composites | A03EX#F04.A06QL | Soft drink, flavoured, no fruit, INGREDIENT = Malt flavour | The group includes any type of flavoured soft drink, not containing fruit pulp or juice. |

**Table 2**: Classification of food products according the NOVA system

| **Sample ID (from lab)** | **Name of Product & Brand** | **Nutrient Profile Group** | **NOVA Groups** | **NOVA Classification** |
| --- | --- | --- | --- | --- |
| UIL.21.14412 | Pure Honey / Capilano | 0 | 2 | Processed culinary ingredients |
| UIL.21.14414 | Natural Honey / Alshifa | 0 | 2 | Processed culinary ingredients |
| UIL.21.14410 | Custard Powder / Alalali | 1 | 4 | Ultra-processed food and drink products |
| UIL.21.14391 | Nutella Hazelnut Spread with Cocoa | 1 | 4 | Ultra-processed food and drink products |
| UIL.21.14396 | Daily Fresh/ Custard Powder | 1 | 4 | Ultra-processed food and drink products |
| UIL.21.13435 | Kinder Joy | 1 | 4 | Ultra-processed food and drink products |
| UIL.21.13437 | Kitkat | 1 | 4 | Ultra-processed food and drink products |
| UIL.21.13438 | Snickers Minis | 1 | 4 | Ultra-processed food and drink products |
| UIL.21.13439 | Bounty Minis | 1 | 4 | Ultra-processed food and drink products |
| UIL.21.13440 | Mars Minis | 1 | 4 | Ultra-processed food and drink products |
| UIL.21.13441 | Extra Peppermint | 1 | 4 | Ultra-processed food and drink products |
| UIL.21.13442 | Batook Specialmint Chewing Gum | 1 | 4 | Ultra-processed food and drink products |
| UIL.21.13443 | Wrigleys Doublemint Chewing Gum | 1 | 4 | Ultra-processed food and drink products |
| UIL.21.13444 | Mentos Sugarfree Chewing Gum | 1 | 4 | Ultra-processed food and drink products |
| UIL.21.13550 | Danet Cream Caramel | 1 | 4 | Ultra-processed food and drink products |
| UIL.21.13454 | Twix Minis | 1 | 4 | Ultra-processed food and drink products |
| UIL.21.14409 | Custard Powder / Tiara | 1 | 4 | Ultra-processed food and drink products |
| UIL.21.13560 | Cream Caramel Almaraei | 1 | 4 | Ultra-processed food and drink products |
| UIL.21.13463 | Cheetos / Flamin Hot | 2 | 4 | Ultra-processed food and drink products |
| UIL.21.14383 | Lay's ( Salt) | 2 | 4 | Ultra-processed food and drink products |
| UIL.21.14384 | Al Mudhish Puffed Corn Cheese Balls | 2 | 4 | Ultra-processed food and drink products |
| UIL.21.14385 | Potato Chips Ready Salted | 2 | 4 | Ultra-processed food and drink products |
| UIL.21.14386 | Chips Oman | 2 | 4 | Ultra-processed food and drink products |
| UIL.21.14388 | Shai (Mix Nut) | 2 | 3 | Processed foods |
| UIL.21.14389 | Popcorn Cheese / American Garden | 2 | 4 | Ultra-processed food and drink products |
| UIL.21.14390 | Mani (Mixed Nuts) | 2 | 3 | Processed foods |
| UIL.21.13433 | Alrifai (Mixed Nuts) | 2 | 3 | Processed foods |
| UIL.21.13431 | American Garden Popcorn Butter | 2 | 4 | Ultra-processed food and drink products |
| UIL.21.13432 | Best Salted Mixed Nuts | 2 | 3 | Processed foods |
| UIL.21.13458 | Nabil Cracker Salted Biscuits | 2 | 4 | Ultra-processed food and drink products |
| UIL.21.13462 | Pringles Original | 2 | 4 | Ultra-processed food and drink products |
| UIL.21.17408 | Cheese Balls (Mr Krispy) | 2 | 4 | Ultra-processed food and drink products |
| UIL.21.14418 | Cheese Balls (Pofak Oman) | 2 | 4 | Ultra-processed food and drink products |
| UIL.21.14551 | Cheese Pastry (Dhahabi) | 2 | 4 | Ultra-processed food and drink products |
| UIL.21.14560 | Sohar Chips | 2 | 4 | Ultra-processed food and drink products |
| **Sample ID (from lab)** | **Name of Product & Brand** | **Nutrient Profile Group** | **NOVA Groups** | **NOVA Classification** |
| UIL.21.13833 | Vanilla Ice cream (Igloo) | 4 | 4 | Ultra-processed food and drink products |
| UIL.21.13832 | Vanilla Ice cream (Mazoon) | 4 | 4 | Ultra-processed food and drink products |
| UIL.21.14387 | Kelloggs Special ( Cereal) | 5 | 4 | Ultra-processed food and drink products |
| UIL.21.13298 | Nestle Gold Corn Flakes | 5 | 4 | Ultra-processed food and drink products |
| UIL.21.13299 | Nestle Chocapic | 5 | 4 | Ultra-processed food and drink products |
| UIL.21.13300 | Kelloggs Coco Pops | 5 | 4 | Ultra-processed food and drink products |
| UIL.21.13448 | Tiffany Glucose (Milk and Honey Biscuits) | 6 | 4 | Ultra-processed food and drink products |
| UIL.21.14574 | 7 Days Mini Croissant | 6 | 4 | Ultra-processed food and drink products |
| UIL.21.13445 | Nabil Glucose | 6 | 4 | Ultra-processed food and drink products |
| UIL.21.13457 | Lotus Biscoff | 6 | 4 | Ultra-processed food and drink products |
| UIL.21.13459 | Original Oreo | 6 | 4 | Ultra-processed food and drink products |
| UIL.21.13460 | Americana Premium Butter Cookies | 6 | 4 | Ultra-processed food and drink products |
| UIL.21.13461 | Danish Butter Cookies | 6 | 4 | Ultra-processed food and drink products |
| UIL.21.13446 | Nabil Cream Wafers (Chocolate Flavour) | 6 | 4 | Ultra-processed food and drink products |
| UIL.21.13447 | Nabil Nice (Sugar Sprinkled Coconut Biscuits) | 6 | 4 | Ultra-processed food and drink products |
| UIL.21.14567 | Switz Mini Cupcake Vanilla | 6 | 4 | Ultra-processed food and drink products |
| UIL.21.14566 | Atyab Twin Cake Vanilla | 6 | 4 | Ultra-processed food and drink products |
| UIL.21.13449 | Tiffany Everyday Nice (Sugar Sprinkled Coconut Biscuits) | 6 | 4 | Ultra-processed food and drink products |
| UIL.21.13451 | Britannia Chocolate Flavoured Premium Crème Wafer | 6 | 4 | Ultra-processed food and drink products |
| UIL.21.13452 | Nutro Chocolate Flavoured Cream Wafers | 6 | 4 | Ultra-processed food and drink products |
| UIL.21.13453 | Tiffany Crunch And Cream | 6 | 4 | Ultra-processed food and drink products |
| UIL.21.17407 | Donut (Switz) | 6 | 4 | Ultra-processed food and drink products |
| UIL.21.17406 | Cheese Puff (Lusine) | 6 | 4 | Ultra-processed food and drink products |
| UIL.21.17405 | Apple Puff (Lusine) | 6 | 4 | Ultra-processed food and drink products |
| UIL.21.14552 | Apple Pastry | 6 | 4 | Ultra-processed food and drink products |
| UIL.21.14568 | Chocolate Jumbo Croissant | 6 | 4 | Ultra-processed food and drink products |
| UIL.21.17531 | Croissant (Dhahabi) | 6 | 4 | Ultra-processed food and drink products |
| UIL.21.13830 | Nestle Cream | 7 | 4 | Ultra-processed food and drink products |
| UIL.21.13592 | Fresh Labnah, Full Fat Al-Marai | 7 | 1 | Unprocessed or minimally processed foods |
| UIL.21.13593 | Labneh Turkish Reciepe: Puck | 7 | 4 | Ultra-processed food and drink products |
| UIL.21.13594 | Fresh Labnah: Full Fat Mazoon | 7 | 1 | Unprocessed or minimally processed foods |
| UIL.21.13558 | Fresh Yougurt, Full Fat: Al-Marai | 7 | 1 | Unprocessed or minimally processed foods |
| UIL.21.13556 | Fresh Yougurt, Full Fat: Al-Safwah | 7 | 1 | Unprocessed or minimally processed foods |
| UIL.21.13559 | Youghurt; Full Cream Alrawabi | 7 | 1 | Unprocessed or minimally processed foods |
| UIL.21.13557 | Yoghurt: Full Cream Unikai | 7 | 1 | Unprocessed or minimally processed foods |
| UIL.21.13546 | Alrawabi Up: Laban Drink | 7 | 1 | Unprocessed or minimally processed foods |
| UIL.21.13544 | Almarai Fresh Laban Full Fat | 7 | 1 | Unprocessed or minimally processed foods |
| **Sample ID (from lab)** | **Name of Product & Brand** | **Nutrient Profile Group** | **NOVA Groups** | **NOVA Classification** |
| UIL.21.13548 | Almarai Strawberry Laban | 7 | 4 | Ultra-processed food and drink products |
| UIL.21.13545 | Almarai Laban Up | 7 | 1 | Unprocessed or minimally processed foods |
| UIL.21.13542 | Mazoon Fresh Laban Full Fat | 7 | 1 | Unprocessed or minimally processed foods |
| UIL.21.13547 | Mazoon Strawberry Laban | 7 | 4 | Ultra-processed food and drink products |
| UIL.21.13540 | Mazoon Laban Up | 7 | 1 | Unprocessed or minimally processed foods |
| UIL.21.13555 | Mazoon Fresh Yoghurt Full Fat | 7 | 1 | Unprocessed or minimally processed foods |
| UIL.21.14180 | Mazoon Sambharam Spicy Laban Drink | 7 | 4 | Ultra-processed food and drink products |
| UIL.21.17409 | Activia Full Fat Plain Yoghurt | 7 | 1 | Unprocessed or minimally processed foods |
| UIL.21.17404 | Balade Farms Ayran Original Laban | 7 | 1 | Unprocessed or minimally processed foods |
| UIL.21.17403 | Activia Full Fat Fresh Laban | 7 | 1 | Unprocessed or minimally processed foods |
| UIL.21.14553 | Cream (Puck) | 7 | 4 | Ultra-processed food and drink products |
| UIL.21.13549 | Laban Drink (Unikai) | 7 | 1 | Unprocessed or minimally processed foods |
| UIL.21.13541 | Laban Up (Alsafwa) | 7 | 1 | Unprocessed or minimally processed foods |
| UIL.21.13543 | Laban Fresh Full Creeam (Asafwah) | 7 | 1 | Unprocessed or minimally processed foods |
| UIL.21.13539 | Fresh Laban (Alrawabi) | 7 | 1 | Unprocessed or minimally processed foods |
| UIL.21.14131 | Cream (Luna) | 7 | 4 | Ultra-processed food and drink products |
| UIL.21.14179 | Laban Drinks (Alkhamayil) | 7 | 1 | Unprocessed or minimally processed foods |
| UIL.21.13836 | Triangle Cheese Abu Alwald | 9 | 4 | Ultra-processed food and drink products |
| UIL.21.13838 | Cheese Triangles Puck | 9 | 4 | Ultra-processed food and drink products |
| UIL.21.13837 | Cheese Triangles Al Maraai | 9 | 4 | Ultra-processed food and drink products |
| UIL.21.13834 | Haloumi Cheese Al-Marai | 9 | 4 | Ultra-processed food and drink products |
| UIL.21.13835 | Haloumi Pinar | 9 | 4 | Ultra-processed food and drink products |
| UIL.21.13848 | Kraft Cheddar Cheese Spread Original | 9 | 4 | Ultra-processed food and drink products |
| UIL.21.13843 | Mazoon Spread Cheese | 9 | 4 | Ultra-processed food and drink products |
| UIL.21.13842 | Mazoon Spread Cheese Cheddar | 9 | 4 | Ultra-processed food and drink products |
| UIL.21.13847 | Puck Cream Cheese | 9 | 4 | Ultra-processed food and drink products |
| UIL.21.13846 | Puck Cream Cheese Cheddar | 9 | 4 | Ultra-processed food and drink products |
| UIL.21.13845 | Almarai Cream Cheese | 9 | 4 | Ultra-processed food and drink products |
| UIL.21.13844 | Almarai Cream Cheese Cheddar | 9 | 4 | Ultra-processed food and drink products |
| UIL.21.13839 | Kraft Slice Cheese Original | 9 | 4 | Ultra-processed food and drink products |
| UIL.21.13841 | Puck Slice Cheese Original | 9 | 4 | Ultra-processed food and drink products |
| UIL.21.13840 | Almarai Burger Slice Cheese | 9 | 4 | Ultra-processed food and drink products |
| UIL.21.14554 | Pinar Processed Cream Cheese Spread | 9 | 4 | Ultra-processed food and drink products |
| UIL.21.14571 | Chedder Cheese (Kraft) | 9 | 4 | Ultra-processed food and drink products |
| UIL.21.14572 | Chedder Cheese (Almarai) | 9 | 4 | Ultra-processed food and drink products |
| UIL.21.13455 | Tiffany Whole Wheat Rusks | 11 | 4 | Ultra-processed food and drink products |
| UIL.21.13456 | Britannia Toastea Wheat Rusk | 11 | 4 | Ultra-processed food and drink products |
| **Sample ID (from lab)** | **Name of Product & Brand** | **Nutrient Profile Group** | **NOVA Groups** | **NOVA Classification** |
| UIL.21.13429 | Indomie Fried Noodles | 12 | 1 | Unprocessed or minimally processed foods |
| UIL.21.14195 | Sadia Chicken Nuggets Crispy | 14 | 4 | Ultra-processed food and drink products |
| UIL.21.14198 | Sadia Chicken Burger | 14 | 4 | Ultra-processed food and drink products |
| UIL.21.14199 | Beef Burger Sadia | 14 | 4 | Ultra-processed food and drink products |
| UIL.21.14203 | Al-Kabeer Jumbo Hotdogs | 14 | 4 | Ultra-processed food and drink products |
| UIL.21.14202 | Al-Islami Ground Beef | 14 | 4 | Ultra-processed food and drink products |
| UIL.21.14205 | Al-Safa Chicken Franks | 14 | 4 | Ultra-processed food and drink products |
| UIL.21.14206 | Sadia Chicken Franks | 14 | 4 | Ultra-processed food and drink products |
| UIL.21.14204 | Americana Beef Hotdog | 14 | 4 | Ultra-processed food and drink products |
| UIL.21.14196 | Al-Safa Chicken Burger | 14 | 4 | Ultra-processed food and drink products |
| UIL.21.14194 | Al-Safa Breaded Chicken Finger | 14 | 4 | Ultra-processed food and drink products |
| UIL.21.14573 | Family Corned Beef | 14 | 4 | Ultra-processed food and drink products |
| UIL.21.14200 | Beef Burger (Taybat) | 14 | 4 | Ultra-processed food and drink products |
| UIL.21.14201 | Corned Beef (Taybat) | 14 | 4 | Ultra-processed food and drink products |
| UIL.21.13434 | White Tuna Meat In Brine | 15 | 3 | Processed foods |
| UIL.21.13291 | Skipjack Tuna Alalali In Sun Flower Oil | 15 | 3 | Processed foods |
| UIL.21.13292 | Tuna Alalali In Water | 15 | 3 | Processed foods |
| UIL.21.13293 | White Tuna Meat In Sun Flower Oil Delmonte | 15 | 3 | Processed foods |
| UIL.21.13294 | Skipjack Tuna California Garden In Sun Flower Oil | 15 | 3 | Processed foods |
| UIL.21.13295 | Light Chunks Tuna California Garden In Water | 15 | 3 | Processed foods |
| UIL.21.14397 | Diamond Strawberry Jam | 17 | 3 | Processed foods |
| UIL.21.14556 | Luna Baked Beans In Tomato Sauce | 17 | 3 | Processed foods |
| UIL.21.14558 | Lunafoul Medames Extra Grade Fava Beans | 17 | 3 | Processed foods |
| UIL.21.14555 | LA MING Beans In Tomato Sauce | 17 | 3 | Processed foods |
| UIL.21.13276 | Green Giant Sweet Corn | 17 | 3 | Processed foods |
| UIL.21.13285 | Green Peas Luna | 17 | 3 | Processed foods |
| UIL.21.13286 | Chick Peas Almazraa | 17 | 3 | Processed foods |
| UIL.21.13287 | Processed Peas Almazraa | 17 | 3 | Processed foods |
| UIL.21.13288 | Sweet Corn Libbys | 17 | 3 | Processed foods |
| UIL.21.13289 | Boildchick Peas Mara | 17 | 3 | Processed foods |
| UIL.21.13290 | Sweet Corn American Garden | 17 | 3 | Processed foods |
| UIL.21.13277 | Plain Medammes California Garden | 17 | 3 | Processed foods |
| UIL.21.13278 | Baked Beans California Garden | 17 | 3 | Processed foods |
| UIL.21.13279 | Processed Peas California Garden | 17 | 3 | Processed foods |
| UIL.21.13280 | Sweet Corn California Garden | 17 | 3 | Processed foods |
| UIL.21.13281 | Chick Peas California Garden | 17 | 3 | Processed foods |
| UIL.21.13282 | Baked Beans Almazraa | 17 | 3 | Processed foods |
| **Sample ID (from lab)** | **Name of Product & Brand** | **Nutrient Profile Group** | **NOVA Groups** | **NOVA Classification** |
| UIL.21.13283 | Foul Medamas Almazraa | 17 | 3 | Processed foods |
| UIL.21.13284 | Chick Peas Luna | 17 | 3 | Processed foods |
| UIL.21.14399 | Tomato Paste / Almudhish | 17 | 3 | Processed foods |
| UIL.21.14400 | Tomato Paste / Jumbo | 17 | 3 | Processed foods |
| UIL.21.14403 | Mango Pickles In Oil / Ahmed | 17 | 3 | Processed foods |
| UIL.21.14404 | Tomato Paste / Alalali | 17 | 3 | Processed foods |
| UIL.21.14557 | Foul Medammas (American Garden) | 17 | 3 | Processed foods |
| UIL.21.14559 | Peas Processed | 17 | 3 | Processed foods |
| UIL.21.14405 | Mango Thokku Pickle In Oil / Priya | 17 | 3 | Processed foods |
| UIL.21.14406 | Mango Pickle / Aeroplane | 17 | 3 | Processed foods |
| UIL.21.14408 | Tomato Ketchup / Hayat | 18 | 4 | Ultra-processed food and drink products |
| UIL.21.14411 | Tomato Ketchup/ Jumbo | 18 | 4 | Ultra-processed food and drink products |
| UIL.21.14413 | Tomato Ketchup / Heinz | 18 | 4 | Ultra-processed food and drink products |
| UIL.21.14415 | Classic Mayonnaise / Mazola | 18 | 4 | Ultra-processed food and drink products |
| UIL.21.14416 | Creamy Classic Mayyonaise / Heinz | 18 | 4 | Ultra-processed food and drink products |
| UIL.21.14417 | Hot Sause / American Garden | 18 | 4 | Ultra-processed food and drink products |
| UIL.21.14563 | Knor Vegetable Stock Cubes | 18 | 4 | Ultra-processed food and drink products |
| UIL.21.14392 | Delicio French Dressing | 18 | 4 | Ultra-processed food and drink products |
| UIL.21.14393 | Delicio 1000 Island | 18 | 4 | Ultra-processed food and drink products |
| UIL.21.14394 | American Garden BBQ Sauce Original | 18 | 4 | Ultra-processed food and drink products |
| UIL.21.14395 | Heinz Classic BBQ Smokey And Rich | 18 | 4 | Ultra-processed food and drink products |
| UIL.21.14565 | Maggi Chicken Stock Less Salt | 18 | 4 | Ultra-processed food and drink products |
| UIL.21.13296 | Hayat Hot Sauce | 18 | 4 | Ultra-processed food and drink products |
| UIL.21.13297 | Jumbo Hot Sauce | 18 | 4 | Ultra-processed food and drink products |
| UIL.21.13430 | Maggi Chicken Stock | 18 | 4 | Ultra-processed food and drink products |
| UIL.21.14564 | Maggi Beef Flavour | 18 | 4 | Ultra-processed food and drink products |
| UIL.21.14562 | Knour Beef Flavoured Stock | 18 | 4 | Ultra-processed food and drink products |
| UIL.21.14561 | Knour CHICKEN Stock | 18 | 4 | Ultra-processed food and drink products |
| UIL.21.14398 | Soy Sauce Classic / American Garden | 18 | 4 | Ultra-processed food and drink products |
| UIL.21.14402 | Hot Sauce / Excellnce | 18 | 4 | Ultra-processed food and drink products |
| UIL.21.14407 | Pizza Sauce Olive& Mushrooms / Alalali | 18 | 4 | Ultra-processed food and drink products |
| UIL.21.14401 | Tabasco Hot Sauce | 18 | 4 | Ultra-processed food and drink products |
| UIL.21.13850 | Al Deyafa Orang Flavour (Powder) | 3a | 4 | Ultra-processed food and drink products |
| UIL.21.13851 | Vimto | 3a | 4 | Ultra-processed food and drink products |
| UIL.21.13828 | Al Deyafa Fruit Cordial | 3a | 4 | Ultra-processed food and drink products |
| UIL.21.14133 | Al Rawabi Apple Juice | 3a | 4 | Ultra-processed food and drink products |
| UIL.21.14134 | Al Marai Mango Juice | 3a | 4 | Ultra-processed food and drink products |
| **Sample ID (from lab)** | **Name of Product & Brand** | **Nutrient Profile Group** | **NOVA Groups** | **NOVA Classification** |
| UIL.21.14132 | Al Rabie Fruit Cocktail Nectar | 3a | 4 | Ultra-processed food and drink products |
| UIL.21.14135 | Almarai Graps And Berries (Farms Select ) | 3a | 4 | Ultra-processed food and drink products |
| UIL.21.14137 | Nada Orange Juice | 3a | 4 | Ultra-processed food and drink products |
| UIL.21.14136 | Nada Mango Juice | 3a | 4 | Ultra-processed food and drink products |
| UIL.21.14138 | Al Rawabi Red Grape Juice | 3a | 4 | Ultra-processed food and drink products |
| UIL.21.14139 | A'safwah Mixed Fruit Juice | 3a | 4 | Ultra-processed food and drink products |
| UIL.21.13829 | Mango Juice Mazoon 200ml | 3a | 4 | Ultra-processed food and drink products |
| UIL.21.13827 | Natural Mango Asafwa 200ml | 3a | 4 | Ultra-processed food and drink products |
| UIL.21.13823 | Alrawabi Orange 1005 juice | 3a | 4 | Ultra-processed food and drink products |
| UIL.21.13825 | Topfruit Fruit Cocktail 200ml | 3a | 4 | Ultra-processed food and drink products |
| UIL.21.13822 | Almarai Orange Juice 100% 300 ml | 3a | 4 | Ultra-processed food and drink products |
| UIL.21.13821 | Asafwa Natural Orange 200 ml | 3a | 4 | Ultra-processed food and drink products |
| UIL.21.14140 | Sun Top Orange Fruit Drink | 3a | 4 | Ultra-processed food and drink products |
| UIL.21.17402 | Tang (Orange) (Powder) | 3a | 4 | Ultra-processed food and drink products |
| UIL.21.13824 | Mixed Fruit Juice (Mazoon) | 3a | 4 | Ultra-processed food and drink products |
| UIL.21.14143 | Fruit Drink (Orange) Rani | 3a | 4 | Ultra-processed food and drink products |
| UIL.21.14141 | Orange Drink (Top Fruit) | 3a | 4 | Ultra-processed food and drink products |
| UIL.21.14142 | Fruit Nectar (Lacnor) | 3a | 4 | Ultra-processed food and drink products |
| UIL.21.13826 | Orange No Add Sugar (Top Fruit) | 3a | 4 | Ultra-processed food and drink products |
| UIL.21.13551 | Mazoon Fresh Milk Strawberry Flavour | 3c | 4 | Ultra-processed food and drink products |
| UIL.21.13450 | Galaxy Smooth Milk | 3c | 4 | Ultra-processed food and drink products |
| UIL.21.13552 | Strwaberry Milk (Asafwah) | 3c | 4 | Ultra-processed food and drink products |
| UIL.21.13554 | Strwberry Fresh Milk (Alrawabi) | 3c | 4 | Ultra-processed food and drink products |
| UIL.21.13553 | Strawberry Flavored Milk | 3c | 4 | Ultra-processed food and drink products |
| UIL.21.14570 | Milk Powder (Almudhish) | 3c | 1 | Unprocessed or minimally processed foods |
| UIL.21.14569 | Milk Powder (Majan) | 3c | 1 | Unprocessed or minimally processed foods |
| UIL.21.14129 | Evaporated Milk (Rainbow) | 3c | 4 | Ultra-processed food and drink products |
| UIL.21.14130 | Tea Milk (Almudhish) | 3c | 4 | Ultra-processed food and drink products |
| UIL.21.14170 | Strawberry Milk (Nada) | 3c | 4 | Ultra-processed food and drink products |
| UIL.21.14171 | Strawberry Flavored Milk (Lacnor) | 3c | 4 | Ultra-processed food and drink products |
| UIL.21.13849 | Power Horse Energy | 3d | 4 | Ultra-processed food and drink products |
| UIL.21.14173 | Energy Drink (Red Bull) | 3d | 4 | Ultra-processed food and drink products |
| UIL.21.14172 | Lipton Peach Ice Tea | 3e | 1 | Unprocessed or minimally processed foods |
| UIL.21.14177 | Malt Beverage (Barbican) | 3e | 4 | Ultra-processed food and drink products |
| UIL.21.14178 | Vitaene Extra (Pokka) | 3e | 4 | Ultra-processed food and drink products |
| UIL.21.14176 | Mountain Dew | 3e | 4 | Ultra-processed food and drink products |
| UIL.21.14175 | Pepsi | 3e | 4 | Ultra-processed food and drink products |
| UIL.21.14174 | Coca Cola | 3e | 4 | Ultra-processed food and drink products |

**Table 3**: Classification of food items according the EMR nutrient profile

| **Sample ID (from lab)** | **Name of Product & Brand** | **Nutrient Profile Group** | **Marketing Permitted/not permitted** | **Food category** | **Amounts for 100 g/ml of the product** | | | | |
| --- | --- | --- | --- | --- | --- | --- | --- | --- | --- |
| **Total fat (g)** | **Total Sugars (g)** | **Energy (kcal)** | **Sat fat (g)** | **Salt (g)** |
| *UIL.21.14414* | Natural Honey / Alshifa | 0 | not include in NP | NO NP Class | 0.00 | 80.30 | 334.56 | 0.00 | 0.00 |
| *UIL.21.14412* | Pure honey / Capilano | 0 | not include in NP | NO NP Class | 0.00 | 81.00 | 327.76 | 0.00 | 0.00 |
| *UIL.21.13442* | Batook Specialmint Chewing Gum | 1 | not permitted | CHOCOLATE AND SUGAR CONFECTIONARY; ENERGY BARS; SWEET TOPPINGS AND DESSERTS | 0.40 | 2.00 | 370.00 | 0.08 | 0.00 |
| *UIL.21.13439* | Bounty Minis | 1 | not permitted | CHOCOLATE AND SUGAR CONFECTIONARY; ENERGY BARS; SWEET TOPPINGS AND DESSERTS | 14.34 | 15.02 | 438.02 | 8.38 | 0.82 |
| *UIL.21.13560* | Cream Caramel Almaraei | 1 | not permitted | CHOCOLATE AND SUGAR CONFECTIONARY; ENERGY BARS; SWEET TOPPINGS AND DESSERTS | 2.23 | 20.92 | 124.03 | 1.66 | 0.15 |
| *UIL.21.14410* | Custard Powder / Alalali | 1 | not permitted | CHOCOLATE AND SUGAR CONFECTIONARY; ENERGY BARS; SWEET TOPPINGS AND DESSERTS | 0.01 | 0.10 | 363.13 | 0.00 | 0.21 |
| *UIL.21.14409* | Custard Powder/Tiara | 1 | not permitted | CHOCOLATE AND SUGAR CONFECTIONARY; ENERGY BARS; SWEET TOPPINGS AND DESSERTS | 0.23 | 0.21 | 355.15 | 0.14 | 0.00 |
| *UIL.21.14396* | Daily Fresh/ Custard Powder | 1 | not permitted | CHOCOLATE AND SUGAR CONFECTIONARY; ENERGY BARS; SWEET TOPPINGS AND DESSERTS | 0.64 | 3.07 | 340.00 | 0.21 | 1.78 |
| *UIL.21.13550* | Danet Cream Caramel | 1 | not permitted | CHOCOLATE AND SUGAR CONFECTIONARY; ENERGY BARS; SWEET TOPPINGS AND DESSERTS | 2.21 | 17.80 | 115.05 | 1.59 | 0.16 |
| *UIL.21.13441* | Extra Peppermint | 1 | not permitted | CHOCOLATE AND SUGAR CONFECTIONARY; ENERGY BARS; SWEET TOPPINGS AND DESSERTS | 0.53 | 52.63 | 510.00 | 0.11 | 0.00 |
| *UIL.21.13435* | Kinder Joy | 1 | not permitted | CHOCOLATE AND SUGAR CONFECTIONARY; ENERGY BARS; SWEET TOPPINGS AND DESSERTS | 32.22 | 49.62 | 545.78 | 15.15 | 0.49 |
| *UIL.21.13437* | Kitkat | 1 | not permitted | CHOCOLATE AND SUGAR CONFECTIONARY; ENERGY BARS; SWEET TOPPINGS AND DESSERTS | 25.29 | 45.37 | 515.01 | 13.76 | 0.19 |
| *UIL.21.13440* | Mars Minis | 1 | not permitted | CHOCOLATE AND SUGAR CONFECTIONARY; ENERGY BARS; SWEET TOPPINGS AND DESSERTS | 17.92 | 57.77 | 473.31 | 11.54 | 0.56 |
| *UIL.21.13444* | Mentos Sugar free Chewing Gum | 1 | not permitted | CHOCOLATE AND SUGAR CONFECTIONARY; ENERGY BARS; SWEET TOPPINGS AND DESSERTS | 0.57 | 32.00 | 382.29 | 0.11 | 0.00 |
| *UIL.21.14391* | Nutella Hazelnut Spread With Cocoa | 1 | not permitted | CHOCOLATE AND SUGAR CONFECTIONARY; ENERGY BARS; SWEET TOPPINGS AND DESSERTS | 31.20 | 57.94 | 546.32 | 10.53 | 0.11 |
| *UIL.21.13438* | Snickers Minis | 1 | not permitted | CHOCOLATE AND SUGAR CONFECTIONARY; ENERGY BARS; SWEET TOPPINGS AND DESSERTS | 26.80 | 52.53 | 509.20 | 6.73 | 0.67 |
| *UIL.21.13454* | Twix Minis | 1 | not permitted | CHOCOLATE AND SUGAR CONFECTIONARY; ENERGY BARS; SWEET TOPPINGS AND DESSERTS | 25.35 | 48.60 | 523.35 | 11.45 | 0.47 |
| *UIL.21.13443* | Wrigleys Doublemint Chewing Gum | 1 | not permitted | CHOCOLATE AND SUGAR CONFECTIONARY; ENERGY BARS; SWEET TOPPINGS AND DESSERTS | 0.38 | 81.54 | 372.69 | 0.08 | 0.00 |
| *UIL.21.14384* | Al Mudhish Puffed Corn Cheese Balls | 2 | not permitted (high salt) | SAVOURY SNACKS | 35.75 | 4.42 | 568.08 | 16.58 | 1.58 |
| *UIL.21.13433* | Alrifai (Mixed Nuts) | 2 | not permitted (high salt) | SAVOURY SNACKS | 32.43 | 7.18 | 537.42 | 4.64 | 0.61 |
| *UIL.21.13431* | American Garden Popcorn Butter | 2 | not permitted (high salt) | SAVOURY SNACKS | 24.42 | 0.30 | 471.21 | 10.91 | 2.50 |
| *UIL.21.13432* | Best Salted Mixed Nuts | 2 | not permitted (high salt) | SAVOURY SNACKS | 51.89 | 4.28 | 643.33 | 8.31 | 0.85 |
| *UIL.21.14418* | Cheese Balls (Pofak Oman) | 2 | not permitted (high salt) | SAVOURY SNACKS | 39.15 | 4.17 | 579.83 | 16.79 | 1.50 |
| *UIL.21.14551* | Cheese pastry (Dhahabi) | 2 | not permitted (high salt) | SAVOURY SNACKS | 18.54 | 3.85 | 378.54 | 4.74 | 0.78 |
| *UIL.21.13463* | Cheetos / Flamin Hot | 2 | not permitted (high salt) | SAVOURY SNACKS | 34.63 | 1.07 | 573.70 | 9.73 | 1.78 |
| *UIL.21.17408* | Cheez Balls (Mr. Krispy) | 2 | not permitted (high salt) | SAVOURY SNACKS | 34.33 | 7.47 | 583.67 | 7.67 | 3.92 |
| *UIL.21.14386* | chips Oman | 2 | not permitted (high salt) | SAVOURY SNACKS | 38.77 | 0.00 | 565.61 | 16.89 | 1.28 |
| *UIL.21.14383* | Lay's (Salt) | 2 | not permitted (high salt) | SAVOURY SNACKS | 35.50 | 0.00 | 564.36 | 16.07 | 1.51 |
| *UIL.21.14390* | Mani (Mixed Nuts ) | 2 | not permitted (high salt) | SAVOURY SNACKS | 49.33 | 8.55 | 623.81 | 7.92 | 0.80 |
| *UIL.21.13458* | Nabil Cracker Salted Biscuits | 2 | not permitted (high salt) | SAVOURY SNACKS | 19.26 | 20.04 | 475.26 | 13.50 | 2.54 |
| **Sample ID (from lab)** | **Name of Product & Brand** | **Nutrient Profile Group** | **Marketing Permitted/not permitted** | **Food category** | **Amounts for 100 g/ml of the product** | | | | |
| **Total fat (g)** | **Total Sugars (g)** | **Energy (kcal)** | **Sat fat (g)** | **Salt (g)** |
| *UIL.21.14389* | Popcorn Cheese / American Garden | 2 | not permitted (high salt) | SAVOURY SNACKS | 34.21 | 0.00 | 528.27 | 15.67 | 2.51 |
| *UIL.21.14385* | potato chips ready salted | 2 | not permitted (high salt) | SAVOURY SNACKS | 36.11 | 0.00 | 561.96 | 15.75 | 1.36 |
| *UIL.21.13462* | Pringles Original | 2 | not permitted (high salt) | SAVOURY SNACKS | 33.49 | 1.05 | 551.77 | 3.53 | 1.15 |
| *UIL.21.14388* | Shai ( Mix Nut) | 2 | not permitted (high salt) | SAVOURY SNACKS | 48.44 | 6.85 | 619.56 | 6.87 | 0.38 |
| *UIL.21.14560* | Sohar Chips | 2 | not permitted (high salt) | SAVOURY SNACKS | 32.36 | 0.00 | 547.20 | 14.31 | 2.41 |
| *UIL.21.13833* | vanilla ice cream (Igloo) | 4 | not permitted | EDIBLE ICES | 11.13 | 18.60 | 197.25 | 6.68 | 0.17 |
| *UIL.21.13832* | vanilla ice cream (Mazoon) | 4 | not permitted | EDIBLE ICES | 7.66 | 12.37 | 136.22 | 4.46 | 0.12 |
| *UIL.21.13300* | KELLOGG'S Coco Pops | 5 | not permitted(high sugars) | BREAKFAST CEREALS | 2.48 | 24.48 | 382.96 | 1.15 | 0.00 |
| *UIL.21.14387* | Kellogg's special (cereal) | 5 | not permitted(high salt) | BREAKFAST CEREALS | 2.21 | 13.92 | 384.56 | 0.59 | 1.77 |
| *UIL.21.13299* | NESTLE Chocapic | 5 | not permitted(high sugars) | BREAKFAST CEREALS | 4.79 | 24.95 | 406.39 | 1.50 | 0.26 |
| *UIL.21.13298* | Nestle Gold Corn Flakes | 5 | permitted | BREAKFAST CEREALS | 1.96 | 10.57 | 383.36 | 0.38 | 1.08 |
| *UIL.21.14574* | 7 days mini croissant | 6 | not permitted | CAKES, SWEET BISCUITS AND PASTRIES; OTHER SWEET BAKER'S WARES, AND DRY MIXES FOR MAKING | 28.55 | 16.82 | 471.82 | 16.73 | 0.52 |
| *UIL.21.13460* | Americana Premium Butter Cookies | 6 | not permitted | CAKES, SWEET BISCUITS AND PASTRIES; OTHER SWEET BAKER'S WARES, AND DRY MIXES FOR MAKING | 20.27 | 29.40 | 489.15 | 9.16 | 0.29 |
| *UIL.21.14552* | Apple pastry | 6 | not permitted | CAKES, SWEET BISCUITS AND PASTRIES; OTHER SWEET BAKER'S WARES, AND DRY MIXES FOR MAKING | 15.74 | 16.32 | 360.86 | 8.37 | 0.03 |
| *UIL.21.17405* | Apple puff (Lusine) | 6 | not permitted | CAKES, SWEET BISCUITS AND PASTRIES; OTHER SWEET BAKER'S WARES, AND DRY MIXES FOR MAKING | 13.10 | 19.66 | 345.16 | 5.89 | 0.70 |
| *UIL.21.14566* | Atyab Twin Cake Vanilla | 6 | not permitted | CAKES, SWEET BISCUITS AND PASTRIES; OTHER SWEET BAKER'S WARES, AND DRY MIXES FOR MAKING | 18.43 | 27.82 | 413.99 | 7.17 | 0.56 |
| *UIL.21.13451* | Britannia Chocolate Flavoured Premium Crème Wafer | 6 | not permitted | CAKES, SWEET BISCUITS AND PASTRIES; OTHER SWEET BAKER'S WARES, AND DRY MIXES FOR MAKING | 25.38 | 33.81 | 513.88 | 15.75 | 0.63 |
| *UIL.21.17406* | Cheese Puff (Lusine) | 6 | not permitted | CAKES, SWEET BISCUITS AND PASTRIES; OTHER SWEET BAKER'S WARES, AND DRY MIXES FOR MAKING | 22.03 | 8.77 | 383.63 | 10.30 | 1.56 |
| *UIL.21.14568* | Chocolate jumbo croissant | 6 | not permitted | CAKES, SWEET BISCUITS AND PASTRIES; OTHER SWEET BAKER'S WARES, AND DRY MIXES FOR MAKING | 23.69 | 12.08 | 422.01 | 13.05 | 0.51 |
| *UIL.21.17531* | Croissant (Dhahabi) | 6 | not permitted | CAKES, SWEET BISCUITS AND PASTRIES; OTHER SWEET BAKER'S WARES, AND DRY MIXES FOR MAKING | 23.18 | 11.95 | 437.90 | 10.21 | 1.58 |
| *UIL.21.13461* | Danish Butter Cookies | 6 | not permitted | CAKES, SWEET BISCUITS AND PASTRIES; OTHER SWEET BAKER'S WARES, AND DRY MIXES FOR MAKING | 25.44 | 26.04 | 510.56 | 18.34 | 0.32 |
| *UIL.21.17407* | Donut (Switz) | 6 | not permitted | CAKES, SWEET BISCUITS AND PASTRIES; OTHER SWEET BAKER'S WARES, AND DRY MIXES FOR MAKING | 17.57 | 19.74 | 405.00 | 5.57 | 0.61 |
| *UIL.21.13457* | Lotus Biscoff | 6 | not permitted | CAKES, SWEET BISCUITS AND PASTRIES; OTHER SWEET BAKER'S WARES, AND DRY MIXES FOR MAKING | 19.36 | 36.41 | 491.67 | 13.59 | 1.05 |
| *UIL.21.13446* | Nabil cream wafers (chocolate flavour) | 6 | not permitted | CAKES, SWEET BISCUITS AND PASTRIES; OTHER SWEET BAKER'S WARES, AND DRY MIXES FOR MAKING | 21.29 | 20.63 | 495.05 | 12.74 | 0.37 |
| *UIL.21.13445* | Nabil glucose | 6 | not permitted | CAKES, SWEET BISCUITS AND PASTRIES; OTHER SWEET BAKER'S WARES, AND DRY MIXES FOR MAKING | 14.36 | 14.88 | 460.72 | 7.42 | 0.00 |
| *UIL.21.13447* | Nabil Nice (sugar sprinkled coconut biscuits) | 6 | not permitted | CAKES, SWEET BISCUITS AND PASTRIES; OTHER SWEET BAKER'S WARES, AND DRY MIXES FOR MAKING | 15.36 | 21.16 | 463.32 | 7.12 | 0.95 |
| *UIL.21.13452* | Nutro Chocolate Flavoured Cream Wafers | 6 | not permitted | CAKES, SWEET BISCUITS AND PASTRIES; OTHER SWEET BAKER'S WARES, AND DRY MIXES FOR MAKING | 30.20 | 36.17 | 535.93 | 26.80 | 0.52 |
| *UIL.21.13459* | Original Oreo | 6 | not permitted | CAKES, SWEET BISCUITS AND PASTRIES; OTHER SWEET BAKER'S WARES, AND DRY MIXES FOR MAKING | 19.47 | 42.11 | 482.84 | 8.79 | 1.48 |
| *UIL.21.14567* | Switz Mini Cup Cake Vanilla | 6 | not permitted | CAKES, SWEET BISCUITS AND PASTRIES; OTHER SWEET BAKER'S WARES, AND DRY MIXES FOR MAKING | 29.41 | 29.00 | 487.53 | 12.75 | 1.03 |
| **Sample ID (from lab)** | **Name of Product & Brand** | **Nutrient Profile Group** | **Marketing Permitted/not permitted** | **Food category** | **Amounts for 100 g/ml of the product** | | | | |
| **Total fat (g)** | **Total Sugars (g)** | **Energy (kcal)** | **Sat fat (g)** | **Salt (g)** |
| *UIL.21.13453* | Tiffany Crunch And Cream | 6 | not permitted | CAKES, SWEET BISCUITS AND PASTRIES; OTHER SWEET BAKER'S WARES, AND DRY MIXES FOR MAKING | 24.36 | 36.23 | 512.36 | 21.51 | 0.31 |
| *UIL.21.13449* | Tiffany Everyday Nice (Sugar Sprinkled Coconut Biscuits) | 6 | not permitted | CAKES, SWEET BISCUITS AND PASTRIES; OTHER SWEET BAKER'S WARES, AND DRY MIXES FOR MAKING | 20.32 | 25.48 | 493.87 | 9.16 | 0.90 |
| *UIL.21.13448* | Tiffany Glucose (Milk and Honey Biscuits) | 6 | not permitted | CAKES, SWEET BISCUITS AND PASTRIES; OTHER SWEET BAKER'S WARES, AND DRY MIXES FOR MAKING | 17.84 | 22.90 | 479.26 | 9.16 | 0.91 |
| *UIL.21.17403* | Activia Full Fat Fresh Laban | 7 | permitted | YOGHURTS, SOUR MILK, CREAM AND OTHER SIMILAR FOODS | 3.28 | 4.46 | 60.92 | 2.26 | 0.13 |
| *UIL.21.17409* | Activia Full Fat Plain Yoghurt | 7 | permitted | YOGHURTS, SOUR MILK, CREAM AND OTHER SIMILAR FOODS | 2.08 | 3.32 | 44.77 | 1.53 | 0.09 |
| *UIL.21.13544* | Almarai Fresh Laban Full Fat | 7 | not permitted (high totalfat & high saturatedfat & high salt) | YOGHURTS, SOUR MILK, CREAM AND OTHER SIMILAR FOODS | 3.64 | 4.09 | 62.42 | 2.57 | 0.14 |
| *UIL.21.13545* | Almarai Laban Up | 7 | not permitted (high salt) | YOGHURTS, SOUR MILK, CREAM AND OTHER SIMILAR FOODS | 1.15 | 3.99 | 38.21 | 0.81 | 0.80 |
| *UIL.21.13548* | Almarai Strawberry Laban | 7 | not permitted (high salt & high sugar) | YOGHURTS, SOUR MILK, CREAM AND OTHER SIMILAR FOODS | 1.36 | 15.29 | 87.91 | 0.91 | 0.14 |
| *UIL.21.13546* | Alrawabi Up: Laban Drink | 7 | not permitted (high salt) | YOGHURTS, SOUR MILK, CREAM AND OTHER SIMILAR FOODS | 1.79 | 3.04 | 37.63 | 1.20 | 0.00 |
| *UIL.21.17404* | Balade Farms Ayran Original Laban | 7 | not permitted (high salt) | YOGHURTS, SOUR MILK, CREAM AND OTHER SIMILAR FOODS | 1.27 | 0.00 | 31.63 | 1.02 | 0.95 |
| *UIL.21.14131* | Cream (Luna) | 7 | not permitted ( high saturatedfat & high salt) | YOGHURTS, SOUR MILK, CREAM AND OTHER SIMILAR FOODS | 21.71 | 3.10 | 219.39 | 16.71 | 0.00 |
| *UIL.21.14553* | Cream (Puck) | 7 | not permitted (high total fat & high saturated fat & high salt) | YOGHURTS, SOUR MILK, CREAM AND OTHER SIMILAR FOODS | 24.51 | 0.00 | 242.71 | 11.62 | 0.01 |
| *UIL.21.13539* | Fresh Laban (Alrawabi) | 7 | not permitted (high totalfat & high saturatedfat & high salt) | YOGHURTS, SOUR MILK, CREAM AND OTHER SIMILAR FOODS | 3.27 | 3.97 | 61.03 | 2.29 | 0.00 |
| *UIL.21.13592* | Fresh Labneh, Full Fat Al-Marai | 7 | not permitted (high totalfat & high saturatedfat & high salt) | YOGHURTS, SOUR MILK, CREAM AND OTHER SIMILAR FOODS | 12.85 | 7.33 | 174.75 | 8.82 | 0.57 |
| *UIL.21.13594* | Fresh Labneh: Full Fat Mazoon | 7 | not permitted (high totalfat & high saturatedfat & high salt) | YOGHURTS, SOUR MILK, CREAM AND OTHER SIMILAR FOODS | 11.13 | 6.63 | 154.97 | 7.82 | 0.54 |
| *UIL.21.13558* | Fresh Yougurt Full Fat: Al-Marai | 7 | not permitted (high totalfat & high saturatedfat & high salt) | YOGHURTS, SOUR MILK, CREAM AND OTHER SIMILAR FOODS | 3.61 | 5.62 | 72.44 | 2.57 | 0.18 |
| *UIL.21.13556* | Fresh Yougurt Full Fat: Al-Safwah | 7 | not permitted (high totalfat) | YOGHURTS, SOUR MILK, CREAM AND OTHER SIMILAR FOODS | 3.23 | 4.78 | 66.59 | 2.01 | 0.18 |
| *UIL.21.13549* | Laban Drink (Unikai) | 7 | not permitted (high salt) | YOGHURTS, SOUR MILK, CREAM AND OTHER SIMILAR FOODS | 0.74 | 3.02 | 32.58 | 0.48 | 4.76 |
| *UIL.21.14179* | Laban Drinks (Alkhamayil) | 7 | not permitted (high salt) | YOGHURTS, SOUR MILK, CREAM AND OTHER SIMILAR FOODS | 0.58 | 0.89 | 29.86 | 0.37 | 0.00 |
| *UIL.21.13543* | Laban Fresh Full Cream (Asafwah) | 7 | not permitted (high totalfat & high saturatedfat & high salt) | YOGHURTS, SOUR MILK, CREAM AND OTHER SIMILAR FOODS | 3.31 | 4.07 | 63.43 | 2.37 | 0.17 |
| *UIL.21.13541* | Laban Up (Alsafwa) | 7 | not permitted (high salt) | YOGHURTS, SOUR MILK, CREAM AND OTHER SIMILAR FOODS | 1.55 | 3.89 | 40.19 | 1.04 | 0.87 |
| *UIL.21.13593* | Labneh Turkish Recipe: Puck | 7 | not permitted (high totalfat & high saturatedfat & high salt) | YOGHURTS, SOUR MILK, CREAM AND OTHER SIMILAR FOODS | 14.21 | 6.43 | 189.21 | 9.82 | 0.79 |
| *UIL.21.13542* | Mazoon Fresh Laban Full Fat | 7 | not permitted (high totalfat) | YOGHURTS, SOUR MILK, CREAM AND OTHER SIMILAR FOODS | 3.30 | 4.48 | 64.62 | 2.22 | 0.13 |
| *UIL.21.13555* | Mazoon Fresh Yoghurt Full Fat | 7 | not permitted (high totalfat & high saturatedfat & high salt) | YOGHURTS, SOUR MILK, CREAM AND OTHER SIMILAR FOODS | 3.21 | 5.04 | 68.05 | 2.29 | 0.15 |
| *UIL.21.13540* | Mazoon Laban Up | 7 | not permitted (high salt) | YOGHURTS, SOUR MILK, CREAM AND OTHER SIMILAR FOODS | 0.89 | 3.70 | 30.49 | 0.60 | 0.88 |
| *UIL.21.14180* | Mazoon Sambharam Spicy Laban Drink | 7 | not permitted (high salt) | YOGHURTS, SOUR MILK, CREAM AND OTHER SIMILAR FOODS | 0.85 | 1.68 | 28.73 | 0.54 | 0.90 |
| *UIL.21.13547* | Mazoon Strawberry Laban | 7 | not permitted (high totalfat) | YOGHURTS, SOUR MILK, CREAM AND OTHER SIMILAR FOODS | 3.49 | 14.27 | 102.01 | 2.30 | 0.14 |
| **Sample ID (from lab)** | **Name of Product & Brand** | **Nutrient Profile Group** | **Marketing Permitted/not permitted** | **Food category** | **Amounts for 100 g/ml of the product** | | | | |
| **Total fat (g)** | **Total Sugars (g)** | **Energy (kcal)** | **Sat fat (g)** | **Salt (g)** |
| *UIL.21.13830* | Nestle cream | 7 | not permitted (high total fat & high saturated fat) | YOGHURTS, SOUR MILK, CREAM AND OTHER SIMILAR FOODS | 23.44 | 0.00 | 242.92 | 13.40 | 0.00 |
| *UIL.21.13557* | Yoghurt: Full Cream Unikai | 7 | not permitted (high totalfat & high saturatedfat & high salt) | YOGHURTS, SOUR MILK, CREAM AND OTHER SIMILAR FOODS | 3.19 | 4.41 | 62.11 | 2.41 | 0.21 |
| *UIL.21.13559* | Youghurt;Full Cream AlRawabi | 7 | not permitted (high totalfat & high saturatedfat & high salt) | YOGHURTS, SOUR MILK, CREAM AND OTHER SIMILAR FOODS | 3.31 | 4.85 | 68.79 | 2.37 | 0.22 |
| *UIL.21.13840* | Almarai Burger Slice Cheese | 9 | not permitted (high total fat & high salt) | CHEESE | 25.30 | 0.00 | 311.50 | 15.15 | 3.50 |
| *UIL.21.13845* | Almarai Cream Cheese | 9 | not permitted (high total fat & high salt) | CHEESE | 34.10 | 0.00 | 344.77 | 25.13 | 1.89 |
| *UIL.21.13844* | Almarai Cream Cheese Cheddar | 9 | not permitted (high total fat & high salt) | CHEESE | 30.87 | 0.00 | 336.87 | 15.50 | 2.93 |
| *UIL.21.14572* | Chedder cheese (Almarai) | 9 | not permitted (high total fat & high salt) | CHEESE | 24.97 | 0.00 | 296.30 | 16.77 | 4.82 |
| *UIL.21.14571* | Chedder cheese (Kraft) | 9 | not permitted (high total fat & high salt) | CHEESE | 25.56 | 0.00 | 306.84 | 17.84 | 4.57 |
| *UIL.21.13837* | Cheese Triangles Al Maraai | 9 | not permitted (high total fat & high salt) | CHEESE | 27.30 | 0.00 | 301.17 | 17.87 | 2.42 |
| *UIL.21.13838* | Cheese Triangles Puck | 9 | not permitted (high total fat & high salt) | CHEESE | 25.52 | 0.00 | 286.88 | 12.95 | 2.79 |
| *UIL.21.13834* | Haloumi Cheese Al-Marai | 9 | not permitted (high total fat & high salt) | CHEESE | 27.10 | 0.00 | 353.50 | 24.20 | 3.19 |
| *UIL.21.13835* | Haloumi Pinar | 9 | not permitted (high total fat & high salt) | CHEESE | 25.87 | 0.00 | 345.91 | 14.12 | 4.82 |
| *UIL.21.13848* | Kraft Cheddar Cheese Spread Original | 9 | not permitted (high total fat & high salt) | CHEESE | 28.21 | 0.00 | 304.09 | 19.12 | 3.09 |
| *UIL.21.13839* | Kraft Slice Cheese Original | 9 | not permitted (high total fat & high salt) | CHEESE | 21.56 | 0.00 | 284.32 | 13.17 | 3.44 |
| *UIL.21.13843* | Mazoon Spread Cheese | 9 | not permitted (high total fat ) | CHEESE | 33.48 | 0.00 | 340.52 | 24.12 | 1.01 |
| *UIL.21.13842* | Mazoon Spread Cheese Cheddar | 9 | not permitted (high total fat ) | CHEESE | 33.52 | 0.00 | 339.60 | 23.82 | 1.00 |
| *UIL.21.14554* | Pinar Processed Cream Cheese Spread | 9 | not permitted (high total fat & high salt) | CHEESE | 31.02 | 0.00 | 312.26 | 27.80 | 1.80 |
| *UIL.21.13847* | Puck Cream Cheese | 9 | not permitted (high total fat & high salt) | CHEESE | 31.85 | 0.00 | 331.21 | 20.97 | 2.12 |
| *UIL.21.13846* | Puck Cream Cheese Cheddar | 9 | not permitted (high total fat & high salt) | CHEESE | 32.01 | 0.00 | 332.65 | 19.20 | 2.02 |
| *UIL.21.13841* | Puck Slice Cheese Original | 9 | not permitted (high total fat & high salt) | CHEESE | 27.66 | 0.00 | 330.90 | 14.04 | 1.55 |
| *UIL.21.13836* | Triangle Cheese Abu Alwald | 9 | not permitted (high total fat & high salt) | CHEESE | 21.02 | 0.00 | 254.50 | 11.92 | 1.89 |
| *UIL.21.13456* | Britannia Toastea Wheat Rusk | 11 | not permitted (high sugar) | BREAD, BREAD PRODUCTS AND CRISP BREADS10 | 9.74 | 26.71 | 436.06 | 4.35 | 0.57 |
| *UIL.21.13455* | Tiffany Whole Wheat Rusks | 11 | not permitted (high sugar) | BREAD, BREAD PRODUCTS AND CRISP BREADS9 | 8.49 | 23.11 | 424.65 | 3.80 | 0.57 |
| *UIL.21.13429* | Indomie Fried Noodles | 12 | not permitted (high total fat & high salt) | FRESH, DRIED OR COOKED PASTA, RICE AND GRAINS | 20.92 | 8.24 | 470.68 | 11.35 | 3.47 |
| *UIL.21.14202* | Al-Islami Ground Beef | 14 | not permitted | PROCESSED MEAT, POULTRY AND SIMILAR | 9.25 | 1.38 | 139.57 | 4.16 | 1.07 |
| *UIL.21.14203* | Al-Kabeer Jumbo Hot Dogs | 14 | not permitted | PROCESSED MEAT, POULTRY AND SIMILAR | 7.69 | 0.00 | 154.69 | 4.31 | 1.37 |
| *UIL.21.14194* | Al-Safa Breaded Chicken Finger | 14 | not permitted | PROCESSED MEAT, POULTRY AND SIMILAR | 8.31 | 0.00 | 228.71 | 2.56 | 1.23 |
| *UIL.21.14196* | Al-Safa Chicken Burger | 14 | not permitted | PROCESSED MEAT, POULTRY AND SIMILAR | 10.41 | 0.00 | 176.89 | 3.01 | 1.00 |
| *UIL.21.14205* | Al-Safa Chicken Franks | 14 | not permitted | PROCESSED MEAT, POULTRY AND SIMILAR | 14.88 | 0.00 | 206.53 | 8.06 | 3.30 |
| *UIL.21.14204* | Americana Beef Hot dog | 14 | not permitted | PROCESSED MEAT, POULTRY AND SIMILAR | 12.56 | 0.00 | 181.68 | 5.27 | 1.53 |
| *UIL.21.14200* | Beef Burger (Taybat) | 14 | not permitted | PROCESSED MEAT, POULTRY AND SIMILAR | 13.52 | 0.00 | 223.72 | 6.99 | 1.58 |
| *UIL.21.14199* | Beef Burger Sadia | 14 | not permitted | PROCESSED MEAT, POULTRY AND SIMILAR | 20.57 | 0.00 | 268.77 | 10.32 | 1.16 |
| *UIL.21.14201* | Corned Beef (Taybat) | 14 | not permitted | PROCESSED MEAT, POULTRY AND SIMILAR | 8.42 | 0.54 | 176.90 | 4.14 | 0.54 |
| *UIL.21.14573* | Family Corned Beef | 14 | not permitted | PROCESSED MEAT, POULTRY AND SIMILAR | 10.59 | 4.02 | 215.19 | 6.54 | 1.08 |
| *UIL.21.14198* | Sadia Chicken Burger | 14 | not permitted | PROCESSED MEAT, POULTRY AND SIMILAR | 15.24 | 0.00 | 221.12 | 5.93 | 1.51 |
| *UIL.21.14206* | Sadia Chicken Franks | 14 | not permitted | PROCESSED MEAT, POULTRY AND SIMILAR | 15.65 | 0.00 | 203.41 | 6.77 | 1.17 |
| *UIL.21.14195* | Sadia Chicken Nuggets Crispy | 14 | not permitted | PROCESSED MEAT, POULTRY AND SIMILAR | 10.35 | 0.00 | 224.19 | 3.21 | 1.06 |
| **Sample ID (from lab)** | **Name of Product & Brand** | **Nutrient Profile Group** | **Marketing Permitted/not permitted** | **Food category** | **Amounts for 100 g/ml of the product** | | | | |
| **Total fat (g)** | **Total Sugars (g)** | **Energy (kcal)** | **Sat fat (g)** | **Salt (g)** |
| *UIL.21.13295* | Light Chunks Tuna California Garden In Water | 15 | not permitted (high salt) | PROCESSED FISH | 1.07 | 0.84 | 108.19 | 0.80 | 0.55 |
| *UIL.21.13291* | Skipjack Tuna Alalali In Sun Flower Oil | 15 | permitted | PROCESSED FISH | 11.02 | 0.80 | 207.50 | 1.46 | 1.22 |
| *UIL.21.13294* | Skipjack Tuna California Garden In Sun Flower Oil | 15 | permitted | PROCESSED FISH | 2.98 | 0.89 | 135.02 | 0.36 | 0.77 |
| *UIL.21.13292* | Tuna Alalali In Water | 15 | permitted | PROCESSED FISH | 0.01 | 0.89 | 106.01 | 0.00 | 1.22 |
| *UIL.21.13434* | White Tuna Meat In Brine | 15 | permitted | PROCESSED FISH | 0.61 | 0.10 | 115.65 | 0.46 | 0.97 |
| *UIL.21.13293* | White Tuna Meat In Sun Flower Oil Delmonte | 15 | permitted | PROCESSED FISH | 5.58 | 0.36 | 161.06 | 0.80 | 1.08 |
| *UIL.21.13282* | Baked Beans Almazraa | 17 | permitted | PROCESSED FRUIT, VEGETABLES AND LEGUMES | 0.63 | 6.12 | 127.15 | 0.16 | 1.00 |
| *UIL.21.13278* | Baked Beans California Garden | 17 | permitted | PROCESSED FRUIT, VEGETABLES AND LEGUMES | 1.20 | 10.40 | 81.26 | 0.38 | 0.79 |
| *UIL.21.13289* | Boildchick Peas Mara | 17 | permitted | PROCESSED FRUIT, VEGETABLES AND LEGUMES | 1.31 | 0.74 | 73.71 | 0.26 | 0.39 |
| *UIL.21.13286* | Chick Peas Almazraa | 17 | permitted | PROCESSED FRUIT, VEGETABLES AND LEGUMES | 0.61 | 0.81 | 94.18 | 0.11 | 0.75 |
| *UIL.21.13281* | Chick Peas California Garden | 17 | not permitted (high add sugar) | PROCESSED FRUIT, VEGETABLES AND LEGUMES | 0.64 | 0.84 | 114.15 | 0.13 | 0.68 |
| *UIL.21.13284* | Chick Peas Luna | 17 | permitted | PROCESSED FRUIT, VEGETABLES AND LEGUMES | 1.60 | 0.76 | 99.00 | 0.74 | 0.88 |
| *UIL.21.14397* | Diamond Strawberry Jam | 17 | not permitted (high sugar) | PROCESSED FRUIT, VEGETABLES AND LEGUMES | 0.31 | 63.84 | 270.23 | 0.27 | 0.04 |
| *UIL.21.13283* | Foul Medamas Almazraa | 17 | not permitted (high add sugar) | PROCESSED FRUIT, VEGETABLES AND LEGUMES | 0.01 | 0.77 | 81.21 | 0.00 | 1.10 |
| *UIL.21.14557* | Foul Medammas (American Garden) | 17 | not permitted (high add sugar) | PROCESSED FRUIT, VEGETABLES AND LEGUMES | 0.01 | 1.22 | 93.52 | 0.00 | 0.87 |
| *UIL.21.13276* | Green Giant Sweet Corn | 17 | permitted | PROCESSED FRUIT, VEGETABLES AND LEGUMES | 1.63 | 7.48 | 83.33 | 0.38 | 0.52 |
| *UIL.21.13285* | Green Peas Luna | 17 | permitted | PROCESSED FRUIT, VEGETABLES AND LEGUMES | 0.42 | 0.61 | 86.50 | 0.12 | 0.60 |
| *UIL.21.14555* | La Ming Beans In Tomato Sauce | 17 | permitted | PROCESSED FRUIT, VEGETABLES AND LEGUMES | 0.98 | 2.40 | 392.74 | 0.23 | 0.00 |
| *UIL.21.14556* | Luna Baked Beans In Tomato Sauce | 17 | permitted | PROCESSED FRUIT, VEGETABLES AND LEGUMES | 0.30 | 3.96 | 88.74 | 0.19 | 0.81 |
| *UIL.21.14558* | Lunafoul Medames Extra Grade Fava Beans | 17 | permitted | PROCESSED FRUIT, VEGETABLES AND LEGUMES | 0.41 | 1.17 | 99.61 | 0.21 | 0.84 |
| *UIL.21.14406* | Mango Pickle / Aeroplane | 17 | not permitted ( high salt) | PROCESSED FRUIT, VEGETABLES AND LEGUMES | 4.08 | 0.10 | 81.04 | 1.23 | 12.80 |
| *UIL.21.14403* | Mango Pickles In Oil / Ahmed | 17 | not permitted (high total fat & high salt) | PROCESSED FRUIT, VEGETABLES AND LEGUMES | 20.80 | 0.50 | 236.80 | 2.30 | 7.66 |
| *UIL.21.14405* | Mango Thokku Pickle In Oil / Priya | 17 | not permitted (high sugar & high salt) | PROCESSED FRUIT, VEGETABLES AND LEGUMES | 4.21 | 22.40 | 166.33 | 1.03 | 11.36 |
| *UIL.21.14559* | Peas processed | 17 | not permitted (high add sugar) | PROCESSED FRUIT, VEGETABLES AND LEGUMES | 0.01 | 2.46 | 84.81 | 0.00 | 0.55 |
| *UIL.21.13277* | Plain Medammes California Garden | 17 | not permitted (high add sugar) | PROCESSED FRUIT, VEGETABLES AND LEGUMES | 0.01 | 0.93 | 94.19 | 0.00 | 0.87 |
| *UIL.21.13287* | Processed Peas Almazraa | 17 | permitted | PROCESSED FRUIT, VEGETABLES AND LEGUMES | 0.01 | 1.64 | 79.67 | 0.00 | 0.83 |
| *UIL.21.13279* | Processed Peas California Garden | 17 | permitted | PROCESSED FRUIT, VEGETABLES AND LEGUMES | 0.01 | 1.64 | 83.92 | 0.15 | 0.84 |
| *UIL.21.13290* | Sweet Corn American Garden | 17 | permitted | PROCESSED FRUIT, VEGETABLES AND LEGUMES | 1.29 | 6.41 | 90.54 | 0.29 | 0.45 |
| *UIL.21.13280* | Sweet Corn California Garden | 17 | permitted | PROCESSED FRUIT, VEGETABLES AND LEGUMES | 1.08 | 3.08 | 98.22 | 0.28 | 0.34 |
| *UIL.21.13288* | Sweet Corn Libbys | 17 | permitted | PROCESSED FRUIT, VEGETABLES AND LEGUMES | 0.55 | 2.09 | 50.06 | 0.16 | 0.57 |
| *UIL.21.14404* | Tomato Paste / Alalali | 17 | not permitted (high sugar & high salt) | PROCESSED FRUIT, VEGETABLES AND LEGUMES | 0.72 | 12.30 | 81.48 | 0.38 | 1.04 |
| *UIL.21.14399* | Tomato Paste / Almudhish | 17 | not permitted (high sugar) | PROCESSED FRUIT, VEGETABLES AND LEGUMES | 1.02 | 10.40 | 97.14 | 0.39 | 0.00 |
| *UIL.21.14400* | Tomato Paste / Jumbo | 17 | permitted | PROCESSED FRUIT, VEGETABLES AND LEGUMES | 0.65 | 4.14 | 85.25 | 0.25 | 0.77 |
| *UIL.21.14394* | American Garden BBQ Sauce Original | 18 | not permitted (high salt) | SAUCES AND DRESSINGS | 0.03 | 34.14 | 166.92 | 0.01 | 2.51 |
| *UIL.21.14415* | Classic Mayonnaise / Mazola | 18 | not permitted (high total fat & high salt) | SAUCES AND DRESSINGS | 79.21 | 3.71 | 727.50 | 13.64 | 1.27 |
| *UIL.21.14416* | Creamy Classic Mayonnaise / Heinz | 18 | not permitted (high total fat & high salt) | SAUCES AND DRESSINGS | 35.85 | 3.46 | 371.49 | 7.32 | 2.05 |
| *UIL.21.14393* | Delicio 1000 Island | 18 | not permitted (high total fat & high salt) | SAUCES AND DRESSINGS | 36.93 | 14.29 | 374.36 | 6.64 | 2.64 |
| *UIL.21.14392* | Delicio French Dressing | 18 | not permitted (high total fat & high salt) | SAUCES AND DRESSINGS | 36.86 | 19.79 | 398.00 | 6.64 | 2.84 |
| *UIL.21.13296* | Hayat Hot Sauce | 18 | not permitted (high salt) | SAUCES AND DRESSINGS | 0.70 | 0.72 | 11.90 | 0.00 | 6.64 |
| *UIL.21.14395* | Heinz Classic BBQ Smokey And Rich | 18 | not permitted (high salt) | SAUCES AND DRESSINGS | 0.35 | 28.68 | 141.63 | 0.15 | 1.26 |
| **Sample ID (from lab)** | **Name of Product & Brand** | **Nutrient Profile Group** | **Marketing Permitted/not permitted** | **Food category** | **Amounts for 100 g/ml of the product** | | | | |
| **Total fat (g)** | **Total Sugars (g)** | **Energy (kcal)** | **Sat fat (g)** | **Salt (g)** |
| *UIL.21.14402* | Hot Sauce / Excellence | 18 | not permitted (high salt) | SAUCES AND DRESSINGS | 0.01 | 9.79 | 43.89 | 0.00 | 5.82 |
| *UIL.21.14417* | Hot Sause / American Garden | 18 | not permitted (high salt) | SAUCES AND DRESSINGS | 0.20 | 2.00 | 12.20 | 0.04 | 7.09 |
| *UIL.21.13297* | Jumbo Hot Sauce | 18 | not permitted (high salt) | SAUCES AND DRESSINGS | 0.10 | 0.58 | 5.70 | 0.00 | 4.09 |
| *UIL.21.14562* | Knour Beef Flavoured Stock | 18 | not permitted (high salt) | SAUCES AND DRESSINGS | 0.00 | 0.00 | 3.08 | 0.00 | 1.17 |
| *UIL.21.14561* | Knour CHICKEN Stock | 18 | not permitted (high salt) | SAUCES AND DRESSINGS | 0.00 | 0.00 | 2.72 | 0.00 | 1.37 |
| *UIL.21.14563* | Knour Vegetable Stock Cubes | 18 | not permitted (high salt) | SAUCES AND DRESSINGS | 0.00 | 0.00 | 2.92 | 0.00 | 1.12 |
| *UIL.21.14564* | Maggi Beef Flavour | 18 | not permitted (high salt) | SAUCES AND DRESSINGS | 0.00 | 0.00 | 51.76 | 0.00 | 50.55 |
| *UIL.21.13430* | Maggi Chicken Stock | 18 | not permitted (high total fat & high salt) | SAUCES AND DRESSINGS | 21.89 | 8.23 | 275.69 | 12.87 | 46.28 |
| *UIL.21.14565* | Maggi Chicken Stock Less Salt | 18 | not permitted (high salt) | SAUCES AND DRESSINGS | 0.00 | 0.00 | 116.40 | 0.00 | 37.54 |
| *UIL.21.14407* | Pizza Sauce Olive& Mushrooms / Alalali | 18 | not permitted (high add sugar) | SAUCES AND DRESSINGS | 1.58 | 6.38 | 61.02 | 0.36 | 0.91 |
| *UIL.21.14398* | Soy Sauce Classic / American Garden | 18 | not permitted (high salt) | SAUCES AND DRESSINGS | 0.20 | 2.00 | 12.20 | 0.04 | 7.25 |
| *UIL.21.14401* | Tabasco Hot Sauce | 18 | not permitted (high salt) | SAUCES AND DRESSINGS | 0.01 | 2.65 | 17.81 | 0.00 | 1.75 |
| *UIL.21.14408* | Tomato Ketchup / Hayat | 18 | not permitted (high salt) | SAUCES AND DRESSINGS | 0.07 | 22.20 | 109.40 | 0.01 | 2.07 |
| *UIL.21.14413* | Tomato Ketchup / Heinz | 18 | not permitted (high salt & high add sugar) | SAUCES AND DRESSINGS | 0.01 | 22.58 | 98.89 | 0.00 | 1.83 |
| *UIL.21.14411* | Tomato Ketchup/ Jumbo | 18 | not permitted (high add sugar) | SAUCES AND DRESSINGS | 0.31 | 26.94 | 124.15 | 0.19 | 0.42 |
| *UIL.21.13828* | Al Deyafa Fruit Cordial | 3a | not permitted | BEVERAGES: a) Fruit juices | 0.00 | 60.59 | 257.32 | 0.00 | 0.04 |
| *UIL.21.13850* | Al Deyafa Orange Flavour (Powder) | 3a | not permitted | BEVERAGES: a) Fruit juices | 0.00 | 94.69 | 382.96 | 0.00 | 0.00 |
| *UIL.21.14134* | Al Marai Mango Juice | 3a | not permitted | BEVERAGES: a) Fruit juices | 0.10 | 11.81 | 64.02 | 0.00 | 0.00 |
| *UIL.21.14132* | Al Rabie Fruit Cocktail Nectar | 3a | not permitted | BEVERAGES: a) Fruit juices | 0.00 | 12.47 | 61.96 | 0.00 | 0.00 |
| *UIL.21.14133* | Al Rawabi Apple Juice | 3a | not permitted | BEVERAGES: a) Fruit juices | 0.10 | 9.15 | 43.34 | 0.02 | 0.00 |
| *UIL.21.14138* | Al Rawabi Red Grape Juice | 3a | not permitted | BEVERAGES: a) Fruit juices | 0.10 | 13.96 | 62.62 | 0.00 | 0.00 |
| *UIL.21.14135* | Almarai Graps And Berries (Farms Select ) | 3a | not permitted | BEVERAGES: a) Fruit juices | 0.05 | 13.61 | 57.81 | 0.00 | 0.00 |
| *UIL.21.13822* | Almarai Orange Juice 100% 300 ml | 3a | not permitted | BEVERAGES: a) Fruit juices | 0.00 | 9.39 | 47.95 | 0.00 | 0.00 |
| *UIL.21.13823* | Alrawabi Orange 1005juice | 3a | not permitted | BEVERAGES: a) Fruit juices | 0.00 | 6.65 | 44.00 | 0.00 | 0.15 |
| *UIL.21.13821* | Asafwa Natural Orange 200 ml | 3a | not permitted | BEVERAGES: a) Fruit juices | 0.00 | 10.25 | 51.76 | 0.00 | 0.42 |
| *UIL.21.14139* | A'safwah Mixed Fruit Juice | 3a | not permitted | BEVERAGES: a) Fruit juices | 0.10 | 11.56 | 57.50 | 0.00 | 0.00 |
| *UIL.21.14143* | Fruit Drink (Orange) , Rani | 3a | not permitted | BEVERAGES: a) Fruit juices | 0.10 | 11.56 | 54.06 | 0.00 | 0.02 |
| *UIL.21.14142* | Fruit Nectar (Lacnor) | 3a | not permitted | BEVERAGES: a) Fruit juices | 0.10 | 12.73 | 54.06 | 0.00 | 0.00 |
| *UIL.21.13829* | Mango Juice Mazoon 200ml | 3a | not permitted | BEVERAGES: a) Fruit juices | 0.00 | 13.44 | 65.76 | 0.00 | 0.00 |
| *UIL.21.13824* | Mixed Fruit Juice (Mazoon) | 3a | not permitted | BEVERAGES: a) Fruit juices | 0.00 | 11.77 | 52.96 | 0.00 | 0.00 |
| *UIL.21.14136* | Nada Mango Juice | 3a | not permitted | BEVERAGES: a) Fruit juices | 0.01 | 10.50 | 52.21 | 0.00 | 0.00 |
| *UIL.21.14137* | Nada Orange Juice | 3a | not permitted | BEVERAGES: a) Fruit juices | 0.05 | 10.46 | 44.33 | 0.00 | 0.00 |
| *UIL.21.13827* | Natural Mango Asafwa 200ml | 3a | not permitted | BEVERAGES: a) Fruit juices | 0.00 | 13.13 | 54.96 | 0.00 | 0.01 |
| *UIL.21.14141* | Orange Drink (Top Fruit) | 3a | not permitted | BEVERAGES: a) Fruit juices | 0.10 | 10.72 | 48.94 | 0.00 | 0.01 |
| *UIL.21.13826* | Orange No Add Sugar (Top Fruit) | 3a | not permitted | BEVERAGES: a) Fruit juices | 0.00 | 9.14 | 41.80 | 0.00 | 0.02 |
| *UIL.21.14140* | Sun Top Orange Fruit Drink | 3a | not permitted | BEVERAGES: a) Fruit juices | 0.10 | 11.84 | 52.98 | 0.00 | 0.01 |
| *UIL.21.17402* | Tang (Orange) (Powder) | 3a | not permitted | BEVERAGES: a) Fruit juices | 0.00 | 96.92 | 387.84 | 0.00 | 0.46 |
| *UIL.21.13825* | Top fruit Fruit Cocktail 200ml | 3a | not permitted | BEVERAGES: a) Fruit juices | 0.00 | 9.28 | 45.52 | 0.00 | 0.06 |
| *UIL.21.13851* | Vimto | 3a | not permitted | BEVERAGES: a) Fruit juices | 0.00 | 12.39 | 50.32 | 0.00 | 0.00 |
| *UIL.21.14129* | Evaporated Milk (Rainbow) | 3c | not permitted (high total fat) | BEVERAGES: c) Milk Drinks | 8.85 | 9.54 | 145.69 | 6.25 | 0.27 |
| **Sample ID (from lab)** | **Name of Product & Brand** | **Nutrient Profile Group** | **Marketing Permitted/not permitted** | **Food category** | **Amounts for 100 g/ml of the product** | | | | |
| **Total fat (g)** | **Total Sugars (g)** | **Energy (kcal)** | **Sat fat (g)** | **Salt (g)** |
| *UIL.21.13450* | Galaxy Smooth Milk | 3c | not permitted (high add sugar) | BEVERAGES: c) Milk Drinks | 0.38 | 73.08 | 388.08 | 0.08 | 0.00 |
| *UIL.21.13551* | Mazoon Fresh Milk Strawberry Flavour | 3c | not permitted (high total fat) | BEVERAGES: c) Milk Drinks | 3.21 | 6.47 | 84.17 | 2.36 | 0.14 |
| *UIL.21.14570* | Milk Powder (Almudhish) | 3c | not permitted (high total fat) | BEVERAGES: c) Milk Drinks | 29.52 | 38.95 | 526.76 | 19.24 | 0.71 |
| *UIL.21.14569* | Milk Powder (Majan) | 3c | not permitted (high total fat) | BEVERAGES: c) Milk Drinks | 29.21 | 47.83 | 523.25 | 20.19 | 0.84 |
| *UIL.21.13553* | Strawberry flavored milk | 3c | not permitted (high add sugar) | BEVERAGES: c) Milk Drinks | 2.50 | 12.03 | 83.21 | 1.74 | 0.15 |
| *UIL.21.14171* | Strawberry Flavored Milk (Lacnor) | 3c | not permitted (high total fat & high add sugar) | BEVERAGES: c) Milk Drinks | 3.26 | 9.84 | 84.46 | 1.94 | 0.18 |
| *UIL.21.13554* | Strawberry Fresh Milk (Alrawabi) | 3c | not permitted (high total fat) | BEVERAGES: c) Milk Drinks | 3.28 | 11.77 | 91.56 | 2.32 | 0.38 |
| *UIL.21.14170* | Strawberry Milk (Nada) | 3c | not permitted (high total fat & high add sugar) | BEVERAGES: c) Milk Drinks | 3.21 | 9.67 | 84.33 | 2.27 | 0.12 |
| *UIL.21.13552* | Strwaberry Milk (Asafwah) | 3c | permitted | BEVERAGES: c) Milk Drinks | 2.42 | 14.14 | 92.06 | 1.78 | 0.15 |
| *UIL.21.14130* | Tea Milk (Almudhish) | 3c | not permitted (high total fat) | BEVERAGES: c) Milk Drinks | 8.12 | 9.28 | 136.88 | 4.05 | 0.27 |
| *UIL.21.14173* | Energy drink (Red bull) | 3d | not permitted | BEVERAGES: d) Energy Drinks | 0.01 | 10.15 | 46.45 | 0.00 | 0.11 |
| *UIL.21.13849* | Power Horse Energy | 3d | not permitted | BEVERAGES: d) Energy Drinks | 0.00 | 11.28 | 47.42 | 0.00 | 0.17 |
| *UIL.21.14174* | Coca cola | 3e | not permitted (high sugar) | BEVERAGES: e) Other Drinks | 0.01 | 9.78 | 43.93 | 0.00 | 0.04 |
| *UIL.21.14172* | Lipton Peach Ice tea | 3e | not permitted (high sugar) | BEVERAGES: e) Other Drinks | 0.01 | 4.40 | 18.53 | 0.00 | 0.03 |
| *UIL.21.14177* | Malt beverage (Barbican) | 3e | not permitted (high sugar) | BEVERAGES: e) Other Drinks | 0.01 | 2.22 | 13.01 | 0.00 | 0.03 |
| *UIL.21.14176* | Mountain Dew | 3e | not permitted (high sugar) | BEVERAGES: e) Other Drinks | 0.01 | 11.55 | 49.37 | 0.00 | 0.04 |
| *UIL.21.14175* | Pepsi | 3e | not permitted (high sugar) | BEVERAGES: e) Other Drinks | 0.01 | 9.98 | 40.93 | 0.00 | 0.03 |
| *UIL.21.14178* | Vitaene Extra (Pokka) | 3e | not permitted (high sugar) | BEVERAGES: e) Other Drinks | 0.01 | 13.36 | 59.21 | 0.00 | 0.00 |

**Table 4**: Nutrient composition of sampled food products

| Sample ID  (from lab) | Name of Product & Brand | Amounts per 100 g/ml from Laboratory Analysis | | | | | | | | | | | | | | | Amounts  per 100 g/ml calculated | | |
| --- | --- | --- | --- | --- | --- | --- | --- | --- | --- | --- | --- | --- | --- | --- | --- | --- | --- | --- | --- |
| **Total Fat (g)** | **SFA  (g)** | **PUFA (g)** | **MUFA (g)** | **TFA  (g)** | **Sodium (mg)** | **Total Sugars (g)** | **Glucose (g)** | **Fructose (g)** | **Sucrose (g)** | **Maltosa (g)** | **Lactose (g)** | **Protein (g)** | **Carbo-hydrate (g)** | **Energy (kJ)** | | **Energy (kcal)** | **Salt  (g)** |
| UIL.21.14412 | Pure Honey / Capilano | 0.00 | 0.00 | 0.00 | 0.00 | 0.00 | 0.00 | 81.00 | 37.20 | 43.80 | 0.10 | 0.10 | 0.10 | 0.00 | 81.94 | 1392.98 | | 327.76 | 0.00 |
| UIL.21.14414 | Natural Honey / Alshifa | 0.00 | 0.00 | 0.00 | 0.00 | 0.00 | 0.01 | 80.30 | 37.09 | 42.94 | 0.10 | 0.10 | 0.10 | 0.00 | 83.64 | 1421.88 | | 334.56 | 0.00 |
| UIL.21.13443 | Wrigleys Doublemint Chewing Gum | 0.38 | 0.08 | 0.08 | 0.08 | 0.08 | 0.04 | 81.54 | 81.54 | 3.85 | 3.85 | 3.85 | 3.85 | 0.77 | 91.54 | 1583.46 | | 372.69 | 0.00 |
| UIL.21.14391 | Nutella Hazelnut Spread With Cocoa | 31.20 | 10.53 | 6.07 | 14.05 | 0.09 | 43.88 | 57.94 | 0.10 | 0.10 | 52.54 | 0.10 | 5.40 | 5.40 | 60.98 | 2282.86 | | 546.32 | 0.11 |
| UIL.21.13440 | Mars Minis | 17.92 | 11.54 | 0.02 | 0.02 | 0.02 | 222.31 | 57.77 | 10.38 | 0.77 | 47.31 | 0.77 | 0.77 | 4.31 | 73.69 | 1989.15 | | 473.31 | 0.56 |
| UIL.21.13441 | Extra Peppermint | 0.53 | 0.11 | 0.11 | 0.11 | 0.11 | 0.05 | 52.63 | 52.63 | 5.26 | 5.26 | 5.26 | 5.26 | 1.05 | 125.26 | 2166.84 | | 510.00 | 0.00 |
| UIL.21.13438 | Snickers Minis | 26.80 | 6.73 | 3.80 | 12.13 | 4.13 | 263.33 | 52.53 | 10.27 | 0.67 | 42.20 | 0.67 | 0.67 | 9.27 | 57.73 | 2130.60 | | 509.20 | 0.67 |
| UIL.21.13435 | Kinder Joy | 32.22 | 15.15 | 3.60 | 13.46 | 0.00 | 191.50 | 49.62 | 0.00 | 0.10 | 49.62 | 0.10 | 0.10 | 8.72 | 55.23 | 2279.29 | | 545.78 | 0.49 |
| UIL.21.13454 | Twix Minis | 25.35 | 11.45 | 3.95 | 10.00 | 0.01 | 186.00 | 48.60 | 6.50 | 0.00 | 36.30 | 0.00 | 5.90 | 4.85 | 68.95 | 2192.55 | | 523.35 | 0.47 |
| UIL.21.13437 | Kitkat | 25.29 | 13.76 | 1.63 | 9.89 | 0.00 | 73.00 | 45.37 | 0.10 | 0.10 | 45.37 | 0.10 | 0.10 | 8.03 | 63.82 | 2157.18 | | 515.01 | 0.19 |
| UIL.21.13444 | Mentos Sugar free Chewing Gum | 0.57 | 0.11 | 0.11 | 0.11 | 0.11 | 0.06 | 32.00 | 4.00 | 5.71 | 28.00 | 5.71 | 5.71 | 1.14 | 93.14 | 1624.00 | | 382.29 | 0.00 |
| UIL.21.13560 | Cream Caramel Almaraei | 2.23 | 1.66 | 0.11 | 0.40 | 0.05 | 60.20 | 20.92 | 1.89 | 1.52 | 12.15 | 0.00 | 5.37 | 3.23 | 22.76 | 524.34 | | 124.03 | 0.15 |
| UIL.21.13550 | Danet Cream Caramel | 2.21 | 1.59 | 0.11 | 23.00 | 0.00 | 62.50 | 17.80 | 1.94 | 1.12 | 10.24 | 0.00 | 4.50 | 3.41 | 20.38 | 486.20 | | 115.05 | 0.16 |
| UIL.21.13439 | Bounty Minis | 14.34 | 8.38 | 2.02 | 6.57 | 0.00 | 321.20 | 15.02 | 1.64 | 0.10 | 13.38 | 0.10 | 0.10 | 9.54 | 67.70 | 1843.66 | | 438.02 | 0.82 |
| UIL.21.14396 | Daily Fresh/ Custard Powder | 0.64 | 0.21 | 0.20 | 0.23 | 0.00 | 699.82 | 3.07 | 3.07 | 0.10 | 0.10 | 0.10 | 0.10 | 0.33 | 83.23 | 1444.20 | | 340.00 | 1.78 |
| UIL.21.13442 | Batook Specialmint Chewing Gum | 0.40 | 0.08 | 0.08 | 0.08 | 0.08 | 0.04 | 2.00 | 2.00 | 4.00 | 4.00 | 4.00 | 4.00 | 1.20 | 90.40 | 1572.00 | | 370.00 | 0.00 |
| UIL.21.14409 | Custard Powder/Tiara | 0.23 | 0.14 | 0.06 | 0.03 | 0.00 | 0.13 | 0.21 | 0.10 | 0.10 | 0.21 | 0.10 | 0.10 | 0.32 | 87.95 | 1509.10 | | 355.15 | 0.00 |
| UIL.21.14410 | Custard Powder / Alalali | 0.01 | 0.00 | 0.00 | 0.00 | 0.00 | 81.20 | 0.10 | 0.10 | 0.10 | 0.10 | 0.10 | 0.10 | 0.01 | 90.75 | 1543.29 | | 363.13 | 0.21 |
| UIL.21.13458 | Nabil Cracker Salted Biscuits | 19.26 | 13.50 | 1.50 | 4.27 | 0.00 | 998.60 | 20.04 | 0.85 | 0.92 | 18.27 | 0.10 | 0.10 | 9.58 | 65.90 | 1995.78 | | 475.26 | 2.54 |
| UIL.21.14390 | Mani ( Mixed Nuts ) | 49.33 | 7.92 | 18.57 | 22.84 | 0.00 | 316.23 | 8.55 | 1.78 | 0.10 | 6.34 | 0.10 | 0.43 | 26.01 | 18.95 | 2589.53 | | 623.81 | 0.80 |
| UIL.21.17408 | Cheese Balls (Mr. Krispy) | 34.33 | 7.67 | 15.67 | 11.00 | 0.01 | 1541.53 | 7.47 | 1.40 | 1.53 | 3.73 | 0.67 | 0.67 | 6.80 | 61.87 | 2437.67 | | 583.67 | 3.92 |
| **Sample ID  (from lab)** | **Name of Product & Brand** | **Amounts per 100 g/ml from Laboratory Analysis** | | | | | | | | | | | | | | **Amounts  per 100 g/ml calculated** | | | |
| **Total Fat (g)** | **SFA  (g)** | **PUFA (g)** | **MUFA (g)** | **TFA  (g)** | **Sodium (mg)** | **Total Sugars (g)** | **Glucose (g)** | **Fructose (g)** | **Sucrose (g)** | **Maltosa (g)** | **Lactose (g)** | **Protein (g)** | **Carbo-hydrate (g)** | **Energy (kJ)** | | **Energy (kcal)** | **Salt  (g)** |
| UIL.21.13433 | Alrifai Mixed Nuts | 32.43 | 4.64 | 9.36 | 18.43 | 0.00 | 240.00 | 7.18 | 0.29 | 0.36 | 6.89 | 0.36 | 0.36 | 21.39 | 40.00 | 2243.49 | | 537.42 | 0.61 |
| UIL.21.14388 | Shai (Mix Nut) | 48.44 | 6.87 | 11.49 | 30.08 | 0.00 | 150.60 | 6.85 | 0.18 | 0.10 | 6.09 | 0.10 | 0.48 | 25.21 | 20.69 | 2572.58 | | 619.56 | 0.38 |
| UIL.21.14384 | Al Mudhish Puffed Corn Cheese Balls | 35.75 | 16.58 | 4.00 | 15.17 | 0.02 | 621.00 | 4.42 | 2.00 | 0.08 | 0.25 | 0.83 | 2.00 | 6.42 | 55.17 | 2369.67 | | 568.08 | 1.58 |
| UIL.21.13432 | Best Salted Mixed Nuts | 51.89 | 8.31 | 15.15 | 28.43 | 0.00 | 336.10 | 4.28 | 0.39 | 0.10 | 3.89 | 0.10 | 0.10 | 24.52 | 19.56 | 2669.29 | | 643.33 | 0.85 |
| UIL.21.14418 | Cheese Balls (Pofak Oman) | 39.15 | 16.79 | 6.37 | 15.99 | 0.00 | 589.13 | 4.17 | 1.06 | 0.10 | 0.20 | 0.10 | 2.91 | 9.89 | 46.98 | 2415.34 | | 579.83 | 1.50 |
| UIL.21.14551 | Cheese Pastry (Dhahabi) | 18.54 | 4.74 | 7.99 | 5.81 | 0.00 | 306.93 | 3.85 | 0.65 | 1.53 | 1.06 | 0.62 | 0.10 | 11.57 | 41.35 | 1585.62 | | 378.54 | 0.78 |
| UIL.21.13463 | Cheetos / Flamin Hot | 34.63 | 9.73 | 4.40 | 19.37 | 0.01 | 700.67 | 1.07 | 1.07 | 0.33 | 0.33 | 0.33 | 0.33 | 5.93 | 59.57 | 2394.93 | | 573.70 | 1.78 |
| UIL.21.13462 | Pringles Original | 33.49 | 3.53 | 10.01 | 19.95 | 0.00 | 452.50 | 1.05 | 0.16 | 0.13 | 0.75 | 0.10 | 0.10 | 4.53 | 58.06 | 2303.16 | | 551.77 | 1.15 |
| UIL.21.13431 | American Garden Popcorn Butter | 24.42 | 10.91 | 4.82 | 8.73 | 0.01 | 985.15 | 0.30 | 0.30 | 0.30 | 0.30 | 0.30 | 0.30 | 7.70 | 55.15 | 1972.12 | | 471.21 | 2.50 |
| UIL.21.14389 | Popcorn Cheese / American Garden | 34.21 | 15.67 | 7.24 | 11.30 | 0.01 | 988.85 | 0.00 | 0.00 | 0.00 | 0.00 | 0.00 | 0.00 | 6.58 | 48.52 | 2202.39 | | 528.27 | 2.51 |
| UIL.21.14560 | Sohar Chips | 32.36 | 14.31 | 5.25 | 12.80 | 0.00 | 950.68 | 0.00 | 0.00 | 0.00 | 0.00 | 0.00 | 0.00 | 3.18 | 60.81 | 2285.15 | | 547.20 | 2.41 |
| UIL.21.14383 | Lay's ( Salt) | 35.50 | 16.07 | 4.57 | 14.79 | 0.01 | 594.36 | 0.00 | 0.00 | 0.00 | 0.00 | 0.00 | 0.00 | 7.50 | 53.71 | 2354.14 | | 564.36 | 1.51 |
| UIL.21.14385 | Potato Chips Ready Salted | 36.11 | 15.75 | 4.96 | 15.39 | 0.01 | 535.71 | 0.00 | 0.00 | 0.00 | 0.00 | 0.00 | 0.00 | 7.11 | 52.14 | 2343.21 | | 561.96 | 1.36 |
| UIL.21.14386 | Chips Oman | 38.77 | 16.89 | 5.29 | 16.58 | 0.00 | 503.20 | 0.00 | 0.00 | 0.00 | 0.00 | 0.00 | 0.00 | 6.54 | 47.63 | 2355.38 | | 565.61 | 1.28 |
| UIL.21.13833 | Vanilla Ice cream (Igloo) | 11.13 | 6.68 | 0.81 | 3.64 | 0.00 | 67.74 | 18.60 | 0.19 | 0.19 | 13.13 | 0.19 | 5.47 | 3.74 | 20.53 | 824.38 | | 197.25 | 0.17 |
| UIL.21.13832 | Vanilla Ice cream (Mazoon) | 7.66 | 4.46 | 0.54 | 2.67 | 0.00 | 45.60 | 12.37 | 2.39 | 1.36 | 5.75 | 2.87 | 0.10 | 3.09 | 13.73 | 569.36 | | 136.22 | 0.12 |
| UIL.21.13299 | Nestle Chocapic | 4.79 | 1.50 | 0.91 | 2.37 | 0.00 | 102.00 | 24.95 | 0.51 | 0.14 | 24.29 | 0.10 | 0.10 | 8.76 | 82.06 | 1721.17 | | 406.39 | 0.26 |
| UIL.21.13300 | Kelloggs Coco Pops | 2.48 | 1.15 | 0.48 | 0.85 | 0.00 | 0.31 | 24.48 | 0.22 | 0.07 | 28.07 | 0.10 | 0.10 | 9.54 | 80.62 | 1624.48 | | 382.96 | 0.00 |
| UIL.21.14387 | Kelloggs Special (Cereal) | 2.21 | 0.59 | 0.82 | 0.08 | 0.01 | 695.69 | 13.92 | 1.72 | 0.33 | 10.82 | 1.05 | 0.26 | 18.26 | 72.92 | 1631.64 | | 384.56 | 1.77 |
| UIL.21.13298 | Nestle Gold Corn Flakes | 1.96 | 0.38 | 1.08 | 0.50 | 0.00 | 426.00 | 10.57 | 0.73 | 0.79 | 8.43 | 0.10 | 0.10 | 7.24 | 84.19 | 1626.83 | | 383.36 | 1.08 |
| UIL.21.13459 | Original Oreo | 19.47 | 8.79 | 2.74 | 7.95 | 0.01 | 582.11 | 42.11 | 0.47 | 0.16 | 41.47 | 0.00 | 0.00 | 5.32 | 71.58 | 2027.74 | | 482.84 | 1.48 |
| UIL.21.13457 | Lotus Biscoff | 19.36 | 13.59 | 1.54 | 4.23 | 0.03 | 412.82 | 36.41 | 0.13 | 0.00 | 36.28 | 0.00 | 0.00 | 5.64 | 73.72 | 2065.38 | | 491.67 | 1.05 |
| UIL.21.13453 | Tiffany Crunch And Cream | 24.36 | 21.51 | 0.57 | 2.27 | 0.00 | 120.30 | 36.23 | 0.10 | 0.10 | 28.09 | 0.00 | 8.13 | 8.65 | 64.63 | 2147.08 | | 512.36 | 0.31 |
| **Sample ID  (from lab)** | **Name of Product & Brand** | **Amounts per 100 g/ml from Laboratory Analysis** | | | | | | | | | | | | | | **Amounts  per 100 g/ml calculated** | | | |
| **Total Fat (g)** | **SFA  (g)** | **PUFA (g)** | **MUFA (g)** | **TFA  (g)** | **Sodium (mg)** | **Total Sugars (g)** | **Glucose (g)** | **Fructose (g)** | **Sucrose (g)** | **Maltosa (g)** | **Lactose (g)** | **Protein (g)** | **Carbo-hydrate (g)** | **Energy (kJ)** | | **Energy (kcal)** | **Salt  (g)** |
| UIL.21.13452 | Nutro chocolate flavoured cream wafers | 30.20 | 26.80 | 0.83 | 2.53 | 0.00 | 204.00 | 36.17 | 0.33 | 0.33 | 31.27 | 0.33 | 4.90 | 3.50 | 62.53 | 2239.97 | | 535.93 | 0.52 |
| UIL.21.13451 | Britannia chocolate flavoured premium crème wafer | 25.38 | 15.75 | 1.25 | 8.34 | 0.00 | 247.50 | 33.81 | 0.31 | 0.31 | 24.25 | 0.31 | 0.31 | 6.88 | 64.50 | 2152.25 | | 513.88 | 0.63 |
| UIL.21.13460 | Americana premium butter cookies | 20.27 | 9.16 | 2.33 | 8.77 | 0.00 | 112.50 | 29.40 | 0.70 | 0.48 | 28.22 | 0.00 | 0.00 | 6.17 | 70.51 | 2053.55 | | 489.15 | 0.29 |
| UIL.21.14567 | Switz Mini cupcake vanilla | 29.41 | 12.75 | 4.91 | 11.53 | 0.01 | 404.19 | 29.00 | 0.34 | 0.91 | 27.78 | 0.31 | 0.31 | 7.13 | 48.59 | 2035.25 | | 487.53 | 1.03 |
| UIL.21.14566 | Atyab twin cake vanilla | 18.43 | 7.17 | 2.14 | 9.12 | 0.00 | 221.84 | 27.82 | 2.09 | 0.10 | 25.73 | 0.10 | 0.10 | 5.82 | 56.21 | 1736.42 | | 413.99 | 0.56 |
| UIL.21.13461 | Danish Butter Cookies | 25.44 | 18.34 | 1.20 | 5.09 | 0.85 | 125.60 | 26.04 | 0.15 | 0.15 | 25.73 | 0.10 | 0.10 | 5.52 | 64.88 | 2138.08 | | 510.56 | 0.32 |
| UIL.21.13449 | Tiffany Everyday Nice (Sugar Sprinkled Coconut Biscuits) | 20.32 | 9.16 | 2.58 | 3.55 | 0.01 | 354.84 | 25.48 | 0.32 | 0.32 | 25.16 | 0.32 | 0.32 | 6.45 | 71.29 | 2073.55 | | 493.87 | 0.90 |
| UIL.21.13448 | Tiffany Glucose (Milk and Honey Biscuits) | 17.84 | 9.16 | 2.26 | 6.45 | 0.01 | 356.45 | 22.90 | 0.32 | 0.32 | 22.26 | 0.32 | 0.32 | 7.42 | 72.26 | 2014.55 | | 479.26 | 0.91 |
| UIL.21.13447 | Nabil Nice (Sugar Sprinkled Coconut Biscuits) | 15.36 | 7.12 | 2.94 | 5.32 | 0.00 | 375.20 | 21.16 | 0.75 | 0.54 | 19.87 | 0.10 | 0.10 | 9.52 | 71.75 | 1949.91 | | 463.32 | 0.95 |
| UIL.21.13446 | Nabil Cream Wafers (Chocolate Flavour) | 21.29 | 12.74 | 2.27 | 6.28 | 0.00 | 147.20 | 20.63 | 0.25 | 0.10 | 20.38 | 0.10 | 0.10 | 5.61 | 70.25 | 2077.35 | | 495.05 | 0.37 |
| UIL.21.17407 | Donut (Switz) | 17.57 | 5.57 | 7.86 | 4.14 | 0.01 | 240.66 | 19.74 | 4.14 | 3.51 | 12.09 | 0.29 | 0.29 | 6.63 | 55.09 | 1699.29 | | 405.00 | 0.61 |
| UIL.21.17405 | Apple Puff (Lusine) | 13.10 | 5.89 | 4.57 | 2.64 | 0.00 | 275.09 | 19.66 | 2.03 | 1.71 | 15.91 | 0.14 | 0.14 | 8.90 | 47.91 | 1450.54 | | 345.16 | 0.70 |
| UIL.21.14574 | 7 Days Mini Croissant | 28.55 | 16.73 | 3.00 | 8.82 | 0.02 | 203.00 | 16.82 | 3.64 | 2.27 | 10.36 | 0.55 | 0.91 | 9.45 | 44.27 | 1969.55 | | 471.82 | 0.52 |
| UIL.21.14552 | Apple Pastry | 15.74 | 8.37 | 2.63 | 4.74 | 0.00 | 12.45 | 16.32 | 5.13 | 6.81 | 2.73 | 1.65 | 0.10 | 5.91 | 48.89 | 1513.98 | | 360.86 | 0.03 |
| UIL.21.13445 | Nabil Glucose | 14.36 | 7.42 | 2.02 | 4.92 | 0.00 | 0.01 | 14.88 | 0.41 | 0.34 | 14.12 | 0.10 | 0.10 | 9.30 | 73.57 | 1940.11 | | 460.72 | 0.00 |
| UIL.21.14568 | Chocolate Jumbo Croissant | 23.69 | 13.05 | 2.74 | 7.90 | 0.00 | 199.78 | 12.08 | 2.13 | 2.42 | 7.21 | 0.32 | 0.10 | 7.75 | 44.45 | 1763.93 | | 422.01 | 0.51 |
| UIL.21.17531 | Croissant (Dhahabi) | 23.18 | 10.21 | 9.85 | 3.12 | 0.00 | 621.51 | 11.95 | 3.12 | 1.89 | 6.94 | 0.10 | 0.10 | 7.21 | 50.11 | 1832.10 | | 437.90 | 1.58 |
| UIL.21.17406 | Cheese Puff (Lusine) | 22.03 | 10.30 | 4.43 | 7.31 | 0.00 | 616.04 | 8.77 | 2.31 | 1.71 | 4.74 | 0.14 | 0.14 | 10.17 | 36.17 | 1602.89 | | 383.63 | 1.56 |
| UIL.21.13548 | Almarai Strawberry Laban | 1.36 | 0.91 | 0.09 | 0.35 | 0.00 | 55.94 | 15.29 | 0.00 | 0.00 | 11.43 | 0.00 | 3.87 | 3.52 | 15.40 | 371.94 | | 87.91 | 0.14 |
| UIL.21.13547 | Mazoon Strawberry Laban | 3.49 | 2.30 | 0.18 | 0.93 | 0.00 | 54.30 | 14.27 | 0.10 | 0.10 | 8.91 | 0.10 | 5.36 | 3.28 | 14.37 | 429.18 | | 102.01 | 0.14 |
| UIL.21.13592 | Fresh Labnah; Full Fat Al-Marai | 12.85 | 8.82 | 1.07 | 2.98 | 0.04 | 223.64 | 7.33 | 1.18 | 0.18 | 0.18 | 0.18 | 6.15 | 5.91 | 8.85 | 726.60 | | 174.75 | 0.57 |
| **Sample ID  (from lab)** | **Name of Product & Brand** | **Amounts per 100 g/ml from Laboratory Analysis** | | | | | | | | | | | | | | **Amounts  per 100 g/ml calculated** | | | |
| **Total Fat (g)** | **SFA  (g)** | **PUFA (g)** | **MUFA (g)** | **TFA  (g)** | **Sodium (mg)** | **Total Sugars (g)** | **Glucose (g)** | **Fructose (g)** | **Sucrose (g)** | **Maltosa (g)** | **Lactose (g)** | **Protein (g)** | **Carbo-hydrate (g)** | **Energy (kJ)** | | **Energy (kcal)** | **Salt  (g)** |
| UIL.21.13594 | Fresh Labnah: Full Fat Mazoon | 11.13 | 7.82 | 0.73 | 2.56 | 0.01 | 213.50 | 6.63 | 1.79 | 0.10 | 0.13 | 0.10 | 4.71 | 6.54 | 7.16 | 644.71 | | 154.97 | 0.54 |
| UIL.21.13593 | Labneh Turkish Reciepe: Puck | 14.21 | 9.82 | 0.88 | 3.47 | 0.03 | 311.50 | 6.43 | 1.19 | 0.10 | 0.10 | 0.10 | 5.25 | 8.41 | 6.92 | 786.38 | | 189.21 | 0.79 |
| UIL.21.13558 | Fresh Yougurt Full Fat: Al-Marai | 3.61 | 2.57 | 0.82 | 0.20 | 0.01 | 71.29 | 5.62 | 0.59 | 0.06 | 0.06 | 0.06 | 4.97 | 4.23 | 5.75 | 303.34 | | 72.44 | 0.18 |
| UIL.21.13555 | Mazoon Fresh Yoghurt Full Fat | 3.21 | 2.29 | 0.17 | 0.73 | 0.01 | 58.30 | 5.04 | 0.41 | 0.10 | 0.10 | 0.10 | 4.63 | 3.41 | 6.38 | 285.20 | | 68.05 | 0.15 |
| UIL.21.13559 | Youghurt; Full Cream Alrawabi | 3.31 | 2.37 | 0.18 | 0.76 | 0.01 | 86.20 | 4.85 | 0.47 | 0.10 | 0.10 | 0.06 | 4.32 | 4.31 | 5.44 | 288.22 | | 68.79 | 0.22 |
| UIL.21.13556 | Fresh Yougurt Full Fat: Al-Safwah | 3.23 | 2.01 | 0.18 | 1.04 | 0.01 | 72.00 | 4.78 | 0.79 | 0.10 | 0.09 | 0.03 | 3.86 | 3.56 | 5.82 | 278.97 | | 66.59 | 0.18 |
| UIL.21.13542 | Mazoon Fresh Laban Full Fat | 3.30 | 2.22 | 0.22 | 0.83 | 0.00 | 51.55 | 4.48 | 0.47 | 0.10 | 0.12 | 0.10 | 3.88 | 4.09 | 4.64 | 270.51 | | 64.62 | 0.13 |
| UIL.21.17403 | Activia Full Fat Fresh Laban | 3.28 | 2.26 | 0.30 | 0.72 | 0.00 | 52.32 | 4.46 | 0.49 | 0.07 | 0.10 | 0.10 | 3.90 | 3.20 | 4.65 | 254.81 | | 60.92 | 0.13 |
| UIL.21.13557 | Yoghurt: Full Cream Unikai | 3.19 | 2.41 | 0.13 | 0.64 | 0.01 | 82.60 | 4.41 | 0.64 | 0.10 | 0.12 | 0.10 | 3.65 | 3.52 | 4.83 | 259.98 | | 62.11 | 0.21 |
| UIL.21.13544 | Almarai Fresh Laban Full Fat | 3.64 | 2.57 | 0.19 | 0.87 | 0.00 | 55.33 | 4.09 | 0.52 | 0.06 | 0.14 | 0.06 | 3.42 | 3.07 | 4.33 | 260.74 | | 62.42 | 0.14 |
| UIL.21.13543 | Laban Fresh Full Creeam (Asafwah) | 3.31 | 2.37 | 0.24 | 0.89 | 0.00 | 68.50 | 4.07 | 0.55 | 0.10 | 0.15 | 0.10 | 3.38 | 3.31 | 5.10 | 265.44 | | 63.43 | 0.17 |
| UIL.21.13545 | Almarai Laban Up | 1.15 | 0.81 | 0.07 | 0.27 | 0.00 | 316.10 | 3.99 | 1.53 | 0.05 | 0.05 | 0.05 | 2.46 | 2.71 | 4.27 | 160.94 | | 38.21 | 0.80 |
| UIL.21.13539 | Fresh Laban (Alrawabi) | 3.27 | 2.29 | 0.20 | 0.86 | 0.00 | 0.06 | 3.97 | 0.49 | 0.07 | 0.10 | 0.10 | 3.40 | 3.28 | 4.62 | 255.29 | | 61.03 | 0.00 |
| UIL.21.13541 | Laban Up (Alsafwa) | 1.55 | 1.04 | 0.11 | 0.39 | 0.00 | 340.60 | 3.89 | 1.71 | 0.10 | 0.10 | 0.10 | 2.20 | 2.60 | 3.96 | 168.87 | | 40.19 | 0.87 |
| UIL.21.13540 | Mazoon Laban Up | 0.89 | 0.60 | 0.05 | 0.23 | 0.00 | 345.30 | 3.70 | 1.30 | 0.10 | 0.10 | 0.10 | 2.40 | 1.92 | 3.70 | 128.47 | | 30.49 | 0.88 |
| UIL.21.17409 | Activia Full Fat Plain Yoghurt | 2.08 | 1.53 | 0.12 | 0.43 | 0.00 | 34.91 | 3.32 | 0.28 | 0.07 | 0.07 | 0.07 | 3.04 | 2.77 | 3.75 | 187.69 | | 44.77 | 0.09 |
| UIL.21.14131 | Cream (Luna) | 21.71 | 16.71 | 0.75 | 4.69 | 0.00 | 0.07 | 3.10 | 0.10 | 0.10 | 0.10 | 0.10 | 3.10 | 2.03 | 3.97 | 905.27 | | 219.39 | 0.00 |
| UIL.21.13546 | Alrawabi Up:Laban Drink | 1.79 | 1.20 | 0.11 | 0.47 | 0.01 | 0.32 | 3.04 | 1.10 | 0.10 | 0.10 | 0.10 | 1.93 | 2.15 | 3.23 | 157.69 | | 37.63 | 0.00 |
| UIL.21.13549 | Laban Drink (Unikai) | 0.74 | 0.48 | 0.04 | 0.19 | 0.00 | 1875.60 | 3.02 | 0.00 | 0.00 | 0.00 | 0.00 | 3.02 | 3.19 | 3.29 | 137.54 | | 32.58 | 4.76 |
| UIL.21.14180 | Mazoon Sambharam Spicy Laban Drink | 0.85 | 0.54 | 0.05 | 0.26 | 0.00 | 355.00 | 1.68 | 0.08 | 0.10 | 0.10 | 0.10 | 1.60 | 1.94 | 3.33 | 121.04 | | 28.73 | 0.90 |
| UIL.21.14179 | Laban Drinks (Alkhamayil) | 0.58 | 0.37 | 0.03 | 0.17 | 0.00 | 0.00 | 0.89 | 0.10 | 0.10 | 0.10 | 0.10 | 0.89 | 1.94 | 4.22 | 126.18 | | 29.86 | 0.00 |
| UIL.21.17404 | Balade Farms Ayran Original Laban | 1.27 | 1.02 | 0.20 | 0.05 | 0.00 | 375.00 | 0.00 | 0.00 | 0.00 | 0.00 | 0.00 | 0.00 | 1.65 | 3.40 | 132.84 | | 31.63 | 0.95 |
| UIL.21.14553 | Cream (Puck) | 24.51 | 11.62 | 3.46 | 9.30 | 0.13 | 2.65 | 0.00 | 0.00 | 0.00 | 0.00 | 0.00 | 0.00 | 2.65 | 2.88 | 1000.88 | | 242.71 | 0.01 |
| UIL.21.13830 | Nestle Cream | 23.44 | 13.40 | 1.64 | 8.40 | 0.00 | 0.08 | 0.00 | 0.00 | 0.00 | 0.00 | 0.00 | 0.00 | 3.09 | 4.90 | 1003.11 | | 242.92 | 0.00 |
| **Sample ID  (from lab)** | **Name of Product & Brand** | **Amounts per 100 g/ml from Laboratory Analysis** | | | | | | | | | | | | | | **Amounts  per 100 g/ml calculated** | | | |
| **Total Fat (g)** | **SFA  (g)** | **PUFA (g)** | **MUFA (g)** | **TFA  (g)** | **Sodium (mg)** | **Total Sugars (g)** | **Glucose (g)** | **Fructose (g)** | **Sucrose (g)** | **Maltosa (g)** | **Lactose (g)** | **Protein (g)** | **Carbo-hydrate (g)** | **Energy (kJ)** | | **Energy (kcal)** | **Salt  (g)** |
| UIL.21.14572 | Chedder Cheese (Almarai) | 24.97 | 16.77 | 2.53 | 5.67 | 0.00 | 1898.77 | 0.00 | 0.00 | 0.00 | 0.00 | 0.00 | 0.00 | 17.90 | 0.00 | 1228.07 | | 296.30 | 4.82 |
| UIL.21.13835 | Haloumi Pinar | 25.87 | 14.12 | 4.52 | 7.23 | 0.00 | 1896.30 | 0.00 | 0.00 | 0.00 | 0.00 | 0.00 | 0.00 | 24.32 | 3.95 | 1437.78 | | 345.91 | 4.82 |
| UIL.21.14571 | Chedder Cheese (Kraft) | 25.56 | 17.84 | 2.56 | 4.24 | 0.96 | 1800.00 | 0.00 | 0.00 | 0.00 | 0.00 | 0.00 | 0.00 | 13.56 | 5.64 | 1272.12 | | 306.84 | 4.57 |
| UIL.21.13840 | Almarai Burger Slice Cheese | 25.30 | 15.15 | 2.80 | 7.35 | 0.01 | 1378.00 | 0.00 | 0.00 | 0.00 | 0.00 | 0.00 | 0.00 | 15.20 | 5.75 | 1292.25 | | 311.50 | 3.50 |
| UIL.21.13839 | Kraft Slice Cheese Original | 21.56 | 13.17 | 0.84 | 6.91 | 0.65 | 1356.20 | 0.00 | 0.00 | 0.00 | 0.00 | 0.00 | 0.00 | 15.14 | 7.43 | 1181.41 | | 284.32 | 3.44 |
| UIL.21.13834 | Haloumi Cheese Al-Marai | 27.10 | 24.20 | 0.60 | 2.30 | 0.01 | 1254.00 | 0.00 | 0.00 | 0.00 | 0.00 | 0.00 | 0.00 | 23.87 | 3.53 | 1468.50 | | 353.50 | 3.19 |
| UIL.21.13848 | Kraft Cheddar Cheese Spread Original | 28.21 | 19.12 | 3.56 | 3.71 | 1.82 | 1215.60 | 0.00 | 0.00 | 0.00 | 0.00 | 0.00 | 0.00 | 8.34 | 4.21 | 1257.12 | | 304.09 | 3.09 |
| UIL.21.13844 | Almarai Cream Cheese Cheddar | 30.87 | 15.50 | 3.93 | 11.43 | 0.01 | 1152.00 | 0.00 | 0.00 | 0.00 | 0.00 | 0.00 | 0.00 | 10.23 | 4.53 | 1393.10 | | 336.87 | 2.93 |
| UIL.21.13838 | Cheese Triangles Puck | 25.52 | 12.95 | 7.30 | 5.15 | 0.12 | 1098.60 | 0.00 | 0.00 | 0.00 | 0.00 | 0.00 | 0.00 | 8.47 | 5.83 | 1187.34 | | 286.88 | 2.79 |
| UIL.21.13837 | Cheese Triangles Al Maraai | 27.30 | 17.87 | 5.20 | 4.23 | 0.01 | 952.00 | 0.00 | 0.00 | 0.00 | 0.00 | 0.00 | 0.00 | 10.37 | 3.50 | 1245.83 | | 301.17 | 2.42 |
| UIL.21.13847 | Puck Cream Cheese | 31.85 | 20.97 | 2.16 | 7.72 | 1.00 | 836.20 | 0.00 | 0.00 | 0.00 | 0.00 | 0.00 | 0.00 | 8.65 | 2.49 | 1367.83 | | 331.21 | 2.12 |
| UIL.21.13846 | Puck Cream Cheese Cheddar | 32.01 | 19.20 | 3.00 | 6.83 | 0.98 | 795.60 | 0.00 | 0.00 | 0.00 | 0.00 | 0.00 | 0.00 | 8.52 | 2.62 | 1373.75 | | 332.65 | 2.02 |
| UIL.21.13836 | Triangle Cheese Abu Alwald | 21.02 | 11.92 | 4.14 | 4.64 | 0.32 | 745.30 | 0.00 | 0.00 | 0.00 | 0.00 | 0.00 | 0.00 | 8.22 | 8.11 | 1055.35 | | 254.50 | 1.89 |
| UIL.21.13845 | Almarai Cream Cheese | 34.10 | 25.13 | 0.93 | 6.77 | 1.30 | 745.00 | 0.00 | 0.00 | 0.00 | 0.00 | 0.00 | 0.00 | 5.20 | 4.27 | 1422.63 | | 344.77 | 1.89 |
| UIL.21.14554 | Pinar Processed Cream Cheese Spread | 31.02 | 27.80 | 1.13 | 1.96 | 0.12 | 709.36 | 0.00 | 0.00 | 0.00 | 0.00 | 0.00 | 0.00 | 6.66 | 1.61 | 1288.33 | | 312.26 | 1.80 |
| UIL.21.13841 | Puck Slice Cheese Original | 27.66 | 14.04 | 3.35 | 10.27 | 0.00 | 608.50 | 0.00 | 0.00 | 0.00 | 0.00 | 0.00 | 0.00 | 14.81 | 5.68 | 1371.75 | | 330.90 | 1.55 |
| UIL.21.13843 | Mazoon Spread Cheese | 33.48 | 24.12 | 1.48 | 7.88 | 0.00 | 395.90 | 0.00 | 0.00 | 0.00 | 0.00 | 0.00 | 0.00 | 6.72 | 3.08 | 1405.36 | | 340.52 | 1.01 |
| UIL.21.13842 | Mazoon Spread Cheese Cheddar | 33.52 | 23.82 | 1.49 | 0.58 | 0.00 | 395.20 | 0.00 | 0.00 | 0.00 | 0.00 | 0.00 | 0.00 | 7.12 | 2.36 | 1401.40 | | 339.60 | 1.00 |
| UIL.21.13456 | Britannia Toastea Wheat Rusk | 9.74 | 4.35 | 1.52 | 3.90 | 0.01 | 223.23 | 26.71 | 9.84 | 9.90 | 6.94 | 0.00 | 0.00 | 9.61 | 77.48 | 1841.10 | | 436.06 | 0.57 |
| UIL.21.13455 | Tiffany Whole Wheat Rusks | 8.49 | 3.80 | 1.28 | 3.37 | 0.00 | 225.20 | 23.11 | 4.93 | 5.08 | 13.10 | 0.00 | 0.00 | 10.13 | 76.93 | 1794.15 | | 424.65 | 0.57 |
| UIL.21.13429 | Indomie Fried Noodles | 20.92 | 11.35 | 2.68 | 6.89 | 0.00 | 1364.30 | 8.24 | 3.56 | 0.66 | 4.02 | 0.10 | 0.10 | 8.54 | 62.06 | 1974.24 | | 470.68 | 3.47 |
| UIL.21.14573 | Family Corned Beef | 10.59 | 6.54 | 0.23 | 3.82 | 0.00 | 425.60 | 4.02 | 3.41 | 0.10 | 0.61 | 0.10 | 0.10 | 24.87 | 5.10 | 901.32 | | 215.19 | 1.08 |
| UIL.21.14202 | Al-Islami Ground Beef | 9.25 | 4.16 | 1.54 | 3.55 | 0.00 | 420.50 | 1.38 | 1.08 | 0.18 | 0.10 | 0.12 | 0.10 | 11.74 | 2.34 | 581.61 | | 139.57 | 1.07 |
| **Sample ID  (from lab)** | **Name of Product & Brand** | **Amounts per 100 g/ml from Laboratory Analysis** | | | | | | | | | | | | | | **Amounts  per 100 g/ml calculated** | | | |
| **Total Fat (g)** | **SFA  (g)** | **PUFA (g)** | **MUFA (g)** | **TFA  (g)** | **Sodium (mg)** | **Total Sugars (g)** | **Glucose (g)** | **Fructose (g)** | **Sucrose (g)** | **Maltosa (g)** | **Lactose (g)** | **Protein (g)** | **Carbo-hydrate (g)** | **Energy (kJ)** | | **Energy (kcal)** | **Salt  (g)** |
| UIL.21.14201 | Corned Beef (Taybat) | 8.42 | 4.14 | 0.84 | 3.44 | 0.00 | 211.20 | 0.54 | 0.32 | 0.16 | 0.20 | 0.06 | 0.20 | 12.50 | 12.78 | 741.30 | | 176.90 | 0.54 |
| UIL.21.14205 | Al-Safa Chicken Franks | 14.88 | 8.06 | 0.35 | 6.47 | 0.01 | 1301.06 | 0.00 | 0.00 | 0.00 | 0.00 | 0.00 | 0.00 | 12.29 | 5.85 | 859.15 | | 206.53 | 3.30 |
| UIL.21.14200 | Beef Burger (Taybat) | 13.52 | 6.99 | 1.43 | 5.10 | 0.00 | 620.63 | 0.00 | 0.00 | 0.00 | 0.00 | 0.00 | 0.00 | 19.11 | 6.40 | 933.91 | | 223.72 | 1.58 |
| UIL.21.14204 | Americana Beef Hotdog | 12.56 | 5.27 | 5.94 | 1.35 | 0.00 | 603.21 | 0.00 | 0.00 | 0.00 | 0.00 | 0.00 | 0.00 | 15.05 | 2.11 | 756.44 | | 181.68 | 1.53 |
| UIL.21.14198 | Sadia Chicken Burger | 15.24 | 5.93 | 4.18 | 5.13 | 0.00 | 595.00 | 0.00 | 0.00 | 0.00 | 0.00 | 0.00 | 0.00 | 14.21 | 6.78 | 920.71 | | 221.12 | 1.51 |
| UIL.21.14203 | Al-Kabeer Jumbo Hotdogs | 7.69 | 4.31 | 2.93 | 0.24 | 0.21 | 539.62 | 0.00 | 0.00 | 0.00 | 0.00 | 0.00 | 0.00 | 17.12 | 4.25 | 647.82 | | 154.69 | 1.37 |
| UIL.21.14194 | Al-Safa Breaded Chicken Finger | 8.31 | 2.56 | 2.33 | 3.42 | 0.00 | 485.60 | 0.00 | 0.00 | 0.00 | 0.00 | 0.00 | 0.00 | 18.80 | 19.68 | 961.63 | | 228.71 | 1.23 |
| UIL.21.14206 | Sadia Chicken Franks | 15.65 | 6.77 | 0.65 | 8.23 | 0.00 | 461.36 | 0.00 | 0.00 | 0.00 | 0.00 | 0.00 | 0.00 | 12.94 | 2.70 | 844.93 | | 203.41 | 1.17 |
| UIL.21.14199 | Beef Burger Sadia | 20.57 | 10.32 | 5.62 | 4.63 | 0.00 | 455.60 | 0.00 | 0.00 | 0.00 | 0.00 | 0.00 | 0.00 | 14.21 | 6.70 | 1116.56 | | 268.77 | 1.16 |
| UIL.21.14195 | Sadia Chicken Nuggets Crispy | 10.35 | 3.21 | 2.86 | 4.28 | 0.00 | 415.70 | 0.00 | 0.00 | 0.00 | 0.00 | 0.00 | 0.00 | 11.89 | 20.87 | 939.87 | | 224.19 | 1.06 |
| UIL.21.14196 | Al-Safa Chicken Burger | 10.41 | 3.01 | 2.85 | 4.55 | 0.00 | 395.20 | 0.00 | 0.00 | 0.00 | 0.00 | 0.00 | 0.00 | 16.86 | 3.94 | 738.77 | | 176.89 | 1.00 |
| UIL.21.13292 | Tuna Alalali In Water | 0.01 | 0.00 | 0.00 | 0.00 | 0.00 | 479.50 | 0.89 | 0.89 | 0.10 | 0.10 | 0.10 | 0.10 | 23.19 | 3.29 | 450.53 | | 106.01 | 1.22 |
| UIL.21.13294 | Skipjack Tuna California Garden In Sun Flower Oil | 2.98 | 0.36 | 1.90 | 0.71 | 0.00 | 303.20 | 0.89 | 0.24 | 0.10 | 0.10 | 0.10 | 0.10 | 25.06 | 1.99 | 570.11 | | 135.02 | 0.77 |
| UIL.21.13295 | Light Chunks Tuna California Garden In Water | 1.07 | 0.80 | 0.24 | 0.03 | 0.00 | 215.30 | 0.84 | 0.84 | 0.10 | 0.10 | 0.10 | 0.10 | 23.69 | 0.95 | 458.47 | | 108.19 | 0.55 |
| UIL.21.13291 | Skipjack Tuna Alalali In Sun Flower Oil | 11.02 | 1.46 | 2.65 | 6.92 | 0.00 | 480.20 | 0.80 | 0.10 | 0.10 | 0.10 | 0.10 | 0.80 | 23.12 | 3.96 | 868.10 | | 207.50 | 1.22 |
| UIL.21.13293 | White Tuna Meat In Sun Flower Oil Delmonte | 5.58 | 0.80 | 3.04 | 1.72 | 0.00 | 425.20 | 0.36 | 0.36 | 0.10 | 0.10 | 0.10 | 0.10 | 24.75 | 2.96 | 677.53 | | 161.06 | 1.08 |
| UIL.21.13434 | White Tuna Meat In Brine | 0.61 | 0.46 | 0.03 | 0.13 | 0.00 | 380.70 | 0.10 | 0.10 | 0.10 | 0.10 | 0.10 | 0.10 | 25.57 | 1.97 | 490.75 | | 115.65 | 0.97 |
| UIL.21.14397 | Diamond Strawberry Jam | 0.31 | 0.27 | 0.00 | 0.04 | 0.00 | 15.20 | 63.84 | 33.03 | 15.93 | 5.88 | 9.00 | 0.10 | 0.39 | 66.47 | 1148.09 | | 270.23 | 0.04 |
| UIL.21.14405 | Mango Thokku Pickle In Oil / Priya | 4.21 | 1.03 | 1.53 | 1.66 | 0.00 | 4470.50 | 22.40 | 19.70 | 2.80 | 0.10 | 0.10 | 0.10 | 4.07 | 28.04 | 701.64 | | 166.33 | 11.36 |
| UIL.21.14404 | Tomato Paste / Alalali | 0.72 | 0.38 | 0.27 | 0.07 | 0.00 | 410.50 | 12.30 | 11.63 | 0.68 | 0.10 | 0.10 | 0.10 | 3.54 | 15.21 | 345.39 | | 81.48 | 1.04 |
| UIL.21.13278 | Baked Beans California Garden | 1.20 | 0.38 | 0.11 | 0.71 | 0.00 | 312.88 | 10.40 | 1.16 | 1.18 | 8.06 | 0.08 | 0.08 | 5.20 | 12.42 | 343.86 | | 81.26 | 0.79 |
| UIL.21.14399 | Tomato Paste / Almudhish | 1.02 | 0.39 | 0.56 | 0.06 | 0.00 | 0.43 | 10.40 | 5.00 | 5.30 | 0.10 | 0.10 | 0.10 | 5.15 | 16.84 | 411.57 | | 97.14 | 0.00 |
| **Sample ID  (from lab)** | **Name of Product & Brand** | **Amounts per 100 g/ml from Laboratory Analysis** | | | | | | | | | | | | | | **Amounts  per 100 g/ml calculated** | | | |
| **Total Fat (g)** | **SFA  (g)** | **PUFA (g)** | **MUFA (g)** | **TFA  (g)** | **Sodium (mg)** | **Total Sugars (g)** | **Glucose (g)** | **Fructose (g)** | **Sucrose (g)** | **Maltosa (g)** | **Lactose (g)** | **Protein (g)** | **Carbo-hydrate (g)** | **Energy (kJ)** | | **Energy (kcal)** | **Salt  (g)** |
| UIL.21.13276 | Green Giant Sweet Corn | 1.63 | 0.38 | 0.81 | 0.44 | 0.00 | 203.50 | 7.48 | 0.46 | 0.19 | 6.83 | 0.13 | 0.13 | 2.01 | 15.16 | 352.10 | | 83.33 | 0.52 |
| UIL.21.13290 | Sweet Corn American Garden | 1.29 | 0.29 | 0.40 | 0.60 | 0.00 | 178.56 | 6.41 | 0.30 | 0.14 | 5.96 | 0.08 | 0.08 | 2.50 | 17.23 | 383.17 | | 90.54 | 0.45 |
| UIL.21.13282 | Baked Beans Almazraa | 0.63 | 0.16 | 0.08 | 0.04 | 0.00 | 392.46 | 6.12 | 0.74 | 0.85 | 4.53 | 0.08 | 0.08 | 4.40 | 25.97 | 539.62 | | 127.15 | 1.00 |
| UIL.21.14400 | Tomato Paste / Jumbo | 0.65 | 0.25 | 0.36 | 0.04 | 0.00 | 301.20 | 4.14 | 1.32 | 2.20 | 0.62 | 0.10 | 0.10 | 2.09 | 17.76 | 361.50 | | 85.25 | 0.77 |
| UIL.21.14556 | LUNA Baked Beans In Tomato Sauce | 0.30 | 0.19 | 0.07 | 0.04 | 0.00 | 320.00 | 3.96 | 0.72 | 1.06 | 2.18 | 0.00 | 0.00 | 7.07 | 14.44 | 376.77 | | 88.74 | 0.81 |
| UIL.21.13280 | Sweet Corn California Garden | 1.08 | 0.28 | 0.37 | 0.42 | 0.00 | 132.69 | 3.08 | 0.08 | 0.08 | 3.08 | 0.08 | 0.08 | 2.15 | 19.98 | 416.07 | | 98.22 | 0.34 |
| UIL.21.14559 | Peas Processed | 0.01 | 0.00 | 0.00 | 0.00 | 0.00 | 214.70 | 2.46 | 0.48 | 0.08 | 1.43 | 0.08 | 0.08 | 3.99 | 17.19 | 360.42 | | 84.81 | 0.55 |
| UIL.21.14555 | La Ming Beans In Tomato Sauce | 0.98 | 0.23 | 0.54 | 0.21 | 0.00 | 0.00 | 2.40 | 0.45 | 0.77 | 1.17 | 0.10 | 0.10 | 7.64 | 88.34 | 1667.92 | | 392.74 | 0.00 |
| UIL.21.13288 | Sweet Corn Libbys | 0.55 | 0.16 | 0.20 | 0.20 | 0.00 | 222.80 | 2.09 | 0.79 | 0.08 | 0.90 | 0.08 | 0.08 | 1.68 | 9.59 | 212.05 | | 50.06 | 0.57 |
| UIL.21.13279 | Processed Peas California Garden | 0.01 | 0.15 | 0.00 | 0.00 | 0.00 | 329.31 | 1.64 | 1.42 | 0.22 | 0.08 | 0.08 | 0.08 | 4.59 | 16.37 | 356.63 | | 83.92 | 0.84 |
| UIL.21.13287 | Processed Peas Almazraa | 0.01 | 0.00 | 0.00 | 0.00 | 0.00 | 325.54 | 1.64 | 0.28 | 0.32 | 1.05 | 0.08 | 0.08 | 4.48 | 15.42 | 338.58 | | 79.67 | 0.83 |
| UIL.21.14557 | Foul Medammas (American Garden) | 0.01 | 0.00 | 0.00 | 0.00 | 0.00 | 340.98 | 1.22 | 0.78 | 0.08 | 0.45 | 0.08 | 0.08 | 6.83 | 16.53 | 397.43 | | 93.52 | 0.87 |
| UIL.21.14558 | Lunafoul Medames Extra Grade Fava Beans | 0.41 | 0.21 | 0.20 | 0.00 | 0.00 | 330.00 | 1.17 | 0.80 | 0.10 | 0.16 | 0.21 | 0.10 | 7.30 | 16.68 | 422.83 | | 99.61 | 0.84 |
| UIL.21.13277 | Plain Medammes California Garden | 0.01 | 0.00 | 0.00 | 0.00 | 0.00 | 342.62 | 0.93 | 0.43 | 0.08 | 0.50 | 0.08 | 0.00 | 6.02 | 17.51 | 400.31 | | 94.19 | 0.87 |
| UIL.21.13281 | Chick Peas California Garden | 0.64 | 0.13 | 0.23 | 0.28 | 0.00 | 266.54 | 0.84 | 0.22 | 0.08 | 0.62 | 0.08 | 0.08 | 7.12 | 19.98 | 484.32 | | 114.15 | 0.68 |
| UIL.21.13286 | Chick Peas Almazraa | 0.61 | 0.11 | 0.17 | 0.32 | 0.00 | 294.15 | 0.81 | 0.08 | 0.08 | 0.81 | 0.08 | 0.08 | 6.04 | 16.14 | 399.49 | | 94.18 | 0.75 |
| UIL.21.13283 | Foul Medamas Almazraa | 0.01 | 0.00 | 0.00 | 0.00 | 0.00 | 434.00 | 0.77 | 0.67 | 0.08 | 0.08 | 0.08 | 0.08 | 5.18 | 15.11 | 345.12 | | 81.21 | 1.10 |
| UIL.21.13284 | Chick Peas Luna | 1.60 | 0.74 | 0.21 | 0.65 | 0.00 | 346.00 | 0.76 | 0.39 | 0.10 | 0.36 | 0.01 | 0.01 | 4.71 | 16.44 | 418.75 | | 99.00 | 0.88 |
| UIL.21.13289 | Boildchick Peas Mara | 1.31 | 0.26 | 0.37 | 0.68 | 0.00 | 153.50 | 0.74 | 0.10 | 0.10 | 0.74 | 0.10 | 0.10 | 4.11 | 11.37 | 311.63 | | 73.71 | 0.39 |
| UIL.21.13285 | Green Peas Luna | 0.42 | 0.12 | 0.11 | 0.19 | 0.00 | 237.00 | 0.61 | 0.13 | 0.10 | 0.49 | 0.10 | 0.10 | 4.27 | 16.41 | 367.10 | | 86.50 | 0.60 |
| UIL.21.14403 | Mango Pickles In Oil / Ahmed | 20.80 | 2.30 | 6.80 | 11.70 | 0.01 | 3016.05 | 0.50 | 0.50 | 0.50 | 0.50 | 0.50 | 0.50 | 3.05 | 9.35 | 980.40 | | 236.80 | 7.66 |
| UIL.21.14406 | Mango Pickle / Aeroplane | 4.08 | 1.23 | 2.19 | 0.66 | 0.00 | 5040.00 | 0.10 | 0.10 | 0.10 | 0.10 | 0.10 | 0.10 | 1.46 | 9.62 | 339.32 | | 81.04 | 12.80 |
| UIL.21.14394 | American Garden BBQ Sauce Original | 0.03 | 0.01 | 0.01 | 0.01 | 0.01 | 989.67 | 34.14 | 17.75 | 15.58 | 0.83 | 0.11 | 0.28 | 0.03 | 41.64 | 709.36 | | 166.92 | 2.51 |
| **Sample ID  (from lab)** | **Name of Product & Brand** | **Amounts per 100 g/ml from Laboratory Analysis** | | | | | | | | | | | | | | **Amounts  per 100 g/ml calculated** | | | |
| **Total Fat (g)** | **SFA  (g)** | **PUFA (g)** | **MUFA (g)** | **TFA  (g)** | **Sodium (mg)** | **Total Sugars (g)** | **Glucose (g)** | **Fructose (g)** | **Sucrose (g)** | **Maltosa (g)** | **Lactose (g)** | **Protein (g)** | **Carbo-hydrate (g)** | **Energy (kJ)** | | **Energy (kcal)** | **Salt  (g)** |
| UIL.21.14395 | Heinz Classic BBQ Smokey And Rich | 0.35 | 0.15 | 0.15 | 0.05 | 0.00 | 495.60 | 28.68 | 6.09 | 6.28 | 16.31 | 0.10 | 0.10 | 0.85 | 33.77 | 601.49 | | 141.63 | 1.26 |
| UIL.21.14411 | Tomato Ketchup/ Jumbo | 0.31 | 0.19 | 0.08 | 0.03 | 0.00 | 163.52 | 26.94 | 8.59 | 9.35 | 9.00 | 0.10 | 0.10 | 0.99 | 29.35 | 527.25 | | 124.15 | 0.42 |
| UIL.21.14413 | Tomato Ketchup / Heinz | 0.01 | 0.00 | 0.00 | 0.00 | 0.00 | 721.49 | 22.58 | 5.81 | 6.54 | 10.23 | 0.10 | 0.10 | 1.40 | 23.30 | 420.27 | | 98.89 | 1.83 |
| UIL.21.14408 | Tomato Ketchup / Hayat | 0.07 | 0.01 | 0.01 | 0.01 | 0.01 | 815.93 | 22.20 | 7.07 | 7.33 | 0.67 | 7.73 | 0.67 | 0.60 | 26.60 | 464.87 | | 109.40 | 2.07 |
| UIL.21.14392 | Delicio French Dressing | 36.86 | 6.64 | 23.00 | 7.21 | 0.01 | 1117.21 | 19.79 | 5.57 | 1.14 | 13.14 | 0.71 | 0.71 | 1.07 | 15.50 | 1645.43 | | 398.00 | 2.84 |
| UIL.21.14393 | Delicio 1000 Island | 36.93 | 6.64 | 23.21 | 7.07 | 0.01 | 1040.36 | 14.29 | 6.86 | 2.43 | 5.07 | 0.71 | 0.71 | 0.86 | 9.64 | 1544.86 | | 374.36 | 2.64 |
| UIL.21.14402 | Hot Sauce / Excellence | 0.01 | 0.00 | 0.00 | 0.00 | 0.00 | 2289.60 | 9.79 | 7.39 | 0.29 | 2.11 | 0.10 | 0.10 | 0.33 | 10.62 | 186.52 | | 43.89 | 5.82 |
| UIL.21.13430 | Maggi Chicken Stock | 21.89 | 12.87 | 2.05 | 6.95 | 0.02 | 18220.00 | 8.23 | 3.56 | 0.66 | 4.02 | 0.00 | 0.00 | 5.16 | 14.51 | 1144.32 | | 275.69 | 46.28 |
| UIL.21.14407 | Pizza Sauce Olive& Mushrooms / Alalali | 1.58 | 0.36 | 0.17 | 1.05 | 0.00 | 358.20 | 6.38 | 2.65 | 3.10 | 0.62 | 0.10 | 0.10 | 2.05 | 9.65 | 257.36 | | 61.02 | 0.91 |
| UIL.21.14415 | Classic Mayonnaise / Mazola | 79.21 | 13.64 | 43.57 | 22.00 | 0.01 | 498.43 | 3.71 | 0.86 | 0.79 | 0.71 | 2.14 | 0.71 | 0.07 | 3.57 | 2992.86 | | 727.50 | 1.27 |
| UIL.21.14416 | Creamy Classic Mayonnaise / Heinz | 35.85 | 7.32 | 20.44 | 8.09 | 0.00 | 807.17 | 3.46 | 0.62 | 0.62 | 2.21 | 0.10 | 0.10 | 0.07 | 12.14 | 1534.02 | | 371.49 | 2.05 |
| UIL.21.14401 | Tabasco Hot Sauce | 0.01 | 0.00 | 0.00 | 0.00 | 0.00 | 690.32 | 2.65 | 0.85 | 0.10 | 0.10 | 1.80 | 0.10 | 1.59 | 2.84 | 75.68 | | 17.81 | 1.75 |
| UIL.21.14398 | Soy Sauce Classic / American Garden | 0.20 | 0.04 | 0.04 | 0.04 | 0.04 | 2853.00 | 2.00 | 2.00 | 2.00 | 2.00 | 2.00 | 2.00 | 0.60 | 2.00 | 51.60 | | 12.20 | 7.25 |
| UIL.21.14417 | Hot Sause / American Garden | 0.20 | 0.04 | 0.04 | 0.04 | 0.04 | 2790.00 | 2.00 | 2.00 | 2.00 | 2.00 | 2.00 | 2.00 | 0.60 | 2.00 | 51.60 | | 12.20 | 7.09 |
| UIL.21.13296 | Hayat Hot Sauce | 0.70 | 0.00 | 0.00 | 0.00 | 0.00 | 2615.90 | 0.72 | 0.72 | 0.10 | 0.10 | 0.10 | 0.10 | 0.63 | 0.77 | 49.70 | | 11.90 | 6.64 |
| UIL.21.13297 | Jumbo Hot Sauce | 0.10 | 0.00 | 0.00 | 0.00 | 0.00 | 1610.20 | 0.58 | 0.58 | 0.10 | 0.10 | 0.10 | 0.10 | 0.34 | 0.86 | 24.10 | | 5.70 | 4.09 |
| UIL.21.14564 | Maggi Beef Flavour | 0.00 | 0.00 | 0.00 | 0.00 | 0.00 | 19900.00 | 0.00 | 0.00 | 0.00 | 0.00 | 0.00 | 0.00 | 0.00 | 12.94 | 219.98 | | 51.76 | 50.55 |
| UIL.21.14565 | Maggi Chicken Stock Less Salt | 0.00 | 0.00 | 0.00 | 0.00 | 0.00 | 14780.00 | 0.00 | 0.00 | 0.00 | 0.00 | 0.00 | 0.00 | 0.00 | 29.10 | 494.70 | | 116.40 | 37.54 |
| UIL.21.14561 | Knour CHICKEN Stock | 0.00 | 0.00 | 0.00 | 0.00 | 0.00 | 539.21 | 0.00 | 0.00 | 0.00 | 0.00 | 0.00 | 0.00 | 0.31 | 0.37 | 11.56 | | 2.72 | 1.37 |
| UIL.21.14562 | Knour Beef Flavoured Stock | 0.00 | 0.00 | 0.00 | 0.00 | 0.00 | 460.63 | 0.00 | 0.00 | 0.00 | 0.00 | 0.00 | 0.00 | 0.25 | 0.52 | 13.09 | | 3.08 | 1.17 |
| UIL.21.14563 | Knor Vegetable Stock Cubes | 0.00 | 0.00 | 0.00 | 0.00 | 0.00 | 442.89 | 0.00 | 0.00 | 0.00 | 0.00 | 0.00 | 0.00 | 0.29 | 0.44 | 12.41 | | 2.92 | 1.12 |
| UIL.21.17402 | Tang (Orange) (Powder) | 0.00 | 0.00 | 0.00 | 0.00 | 0.00 | 180.92 | 96.92 | 0.40 | 0.40 | 96.92 | 0.40 | 0.40 | 0.04 | 96.92 | 1648.32 | | 387.84 | 0.46 |
| UIL.21.13850 | Al Deyafa Orang Flavour (Powder) | 0.00 | 0.00 | 0.00 | 0.00 | 0.00 | 0.17 | 94.69 | 0.10 | 0.10 | 94.96 | 0.10 | 0.10 | 0.01 | 95.73 | 1627.58 | | 382.96 | 0.00 |
| UIL.21.13828 | Al Deyafa Fruit Cordial | 0.00 | 0.00 | 0.00 | 0.00 | 0.00 | 15.20 | 60.59 | 31.86 | 28.73 | 0.10 | 0.10 | 0.10 | 0.00 | 64.33 | 1093.61 | | 257.32 | 0.04 |
| **Sample ID  (from lab)** | **Name of Product & Brand** | **Amounts per 100 g/ml from Laboratory Analysis** | | | | | | | | | | | | | | **Amounts  per 100 g/ml calculated** | | | |
| **Total Fat (g)** | **SFA  (g)** | **PUFA (g)** | **MUFA (g)** | **TFA  (g)** | **Sodium (mg)** | **Total Sugars (g)** | **Glucose (g)** | **Fructose (g)** | **Sucrose (g)** | **Maltosa (g)** | **Lactose (g)** | **Protein (g)** | **Carbo-hydrate (g)** | **Energy (kJ)** | | **Energy (kcal)** | **Salt  (g)** |
| UIL.21.14138 | Al Rawabi Red Grape Juice | 0.10 | 0.00 | 0.00 | 0.00 | 0.00 | 0.00 | 13.96 | 6.95 | 7.01 | 0.10 | 0.10 | 0.10 | 0.25 | 15.18 | 266.01 | | 62.62 | 0.00 |
| UIL.21.14135 | Almarai Graps And Berries ( Farms Select ) | 0.05 | 0.00 | 0.00 | 0.00 | 0.00 | 0.00 | 13.61 | 2.04 | 2.63 | 8.94 | 0.05 | 0.05 | 0.26 | 14.08 | 245.63 | | 57.81 | 0.00 |
| UIL.21.13829 | Mango Juice Mazoon 200 ml | 0.00 | 0.00 | 0.00 | 0.00 | 0.00 | 0.00 | 13.44 | 0.10 | 0.71 | 12.63 | 0.10 | 0.10 | 0.00 | 16.44 | 279.48 | | 65.76 | 0.00 |
| UIL.21.13827 | Natural Mango Asafwa 200 ml | 0.00 | 0.00 | 0.00 | 0.00 | 0.00 | 5.30 | 13.13 | 0.39 | 0.99 | 11.75 | 0.10 | 0.10 | 0.00 | 13.74 | 233.58 | | 54.96 | 0.01 |
| UIL.21.14142 | Fruit Nectar (Lacnor) | 0.10 | 0.00 | 0.00 | 0.00 | 0.00 | 1.62 | 12.73 | 2.74 | 3.42 | 6.57 | 0.10 | 0.10 | 0.09 | 13.20 | 229.63 | | 54.06 | 0.00 |
| UIL.21.14132 | Al Rabie Fruit Cocktail Nectar | 0.00 | 0.00 | 0.00 | 0.00 | 0.00 | 0.00 | 12.47 | 3.47 | 4.26 | 4.73 | 0.10 | 0.10 | 0.00 | 15.49 | 263.33 | | 61.96 | 0.00 |
| UIL.21.13851 | Vimto | 0.00 | 0.00 | 0.00 | 0.00 | 0.00 | 0.00 | 12.39 | 6.59 | 5.80 | 0.04 | 0.12 | 0.15 | 0.00 | 12.58 | 213.86 | | 50.32 | 0.00 |
| UIL.21.14140 | Sun Top Orange Fruit Drink | 0.10 | 0.00 | 0.00 | 0.00 | 0.00 | 3.50 | 11.84 | 5.59 | 6.25 | 0.10 | 0.10 | 0.10 | 0.35 | 12.67 | 225.04 | | 52.98 | 0.01 |
| UIL.21.14134 | Al Marai Mango Juice | 0.10 | 0.00 | 0.00 | 0.00 | 0.00 | 0.00 | 11.81 | 0.10 | 0.10 | 11.81 | 0.10 | 0.10 | 0.38 | 15.40 | 271.96 | | 64.02 | 0.00 |
| UIL.21.13824 | Mixed Fruit Juice (Mazoon) | 0.00 | 0.00 | 0.00 | 0.00 | 0.00 | 0.00 | 11.77 | 5.59 | 5.72 | 0.46 | 0.10 | 0.10 | 0.00 | 13.24 | 225.08 | | 52.96 | 0.00 |
| UIL.21.14143 | Fruit Drink (Orange) Rani | 0.10 | 0.00 | 0.00 | 0.00 | 0.00 | 7.60 | 11.56 | 4.46 | 4.71 | 2.38 | 0.10 | 0.10 | 0.16 | 13.13 | 229.63 | | 54.06 | 0.02 |
| UIL.21.14139 | A'safwah Mixed Fruit Juice | 0.10 | 0.00 | 0.00 | 0.00 | 0.00 | 0.00 | 11.56 | 0.24 | 0.47 | 10.85 | 0.10 | 0.10 | 0.08 | 14.07 | 244.25 | | 57.50 | 0.00 |
| UIL.21.14141 | Orange Drink (Top Fruit) | 0.10 | 0.00 | 0.00 | 0.00 | 0.00 | 5.60 | 10.72 | 0.23 | 2.80 | 7.92 | 0.10 | 0.10 | 0.09 | 11.92 | 207.87 | | 48.94 | 0.01 |
| UIL.21.14136 | Nada Mango Juice | 0.01 | 0.00 | 0.00 | 0.00 | 0.00 | 0.00 | 10.50 | 1.34 | 1.30 | 7.86 | 0.05 | 0.05 | 0.26 | 12.78 | 221.87 | | 52.21 | 0.00 |
| UIL.21.14137 | Nada Orange Juice | 0.05 | 0.00 | 0.00 | 0.00 | 0.00 | 0.00 | 10.46 | 2.00 | 2.61 | 5.85 | 0.05 | 0.05 | 0.70 | 10.27 | 188.34 | | 44.33 | 0.00 |
| UIL.21.13821 | Asafwa Natural Orange 200 ml | 0.00 | 0.00 | 0.00 | 0.00 | 0.00 | 165.20 | 10.25 | 2.07 | 2.55 | 5.63 | 0.10 | 0.10 | 0.00 | 12.94 | 219.98 | | 51.76 | 0.42 |
| UIL.21.13822 | Almarai Orange Juice 100% 300 ml | 0.00 | 0.00 | 0.00 | 0.00 | 0.00 | 0.00 | 9.39 | 2.40 | 2.45 | 4.54 | 0.03 | 0.03 | 2.40 | 9.59 | 203.77 | | 47.95 | 0.00 |
| UIL.21.13825 | Top fruit. Fruit Cocktail 200 ml | 0.00 | 0.00 | 0.00 | 0.00 | 0.00 | 23.00 | 9.28 | 4.38 | 4.90 | 0.10 | 0.10 | 0.10 | 0.00 | 11.38 | 193.46 | | 45.52 | 0.06 |
| UIL.21.14133 | Al Rawabi Apple Juice | 0.10 | 0.02 | 0.00 | 0.00 | 0.00 | 0.00 | 9.15 | 5.81 | 3.32 | 0.02 | 0.00 | 0.00 | 0.26 | 10.35 | 184.07 | | 43.34 | 0.00 |
| UIL.21.13826 | Orange No Add Sugar (Top Fruit) | 0.00 | 0.00 | 0.00 | 0.00 | 0.00 | 8.50 | 9.14 | 2.83 | 3.05 | 3.26 | 0.10 | 0.10 | 0.00 | 10.45 | 177.65 | | 41.80 | 0.02 |
| UIL.21.13823 | Alrawabi Orange 1005juice | 0.00 | 0.00 | 0.00 | 0.00 | 0.00 | 60.10 | 6.65 | 1.40 | 1.43 | 3.82 | 0.10 | 0.10 | 0.00 | 11.00 | 187.00 | | 44.00 | 0.15 |
| UIL.21.13450 | Galaxy Smooth Milk | 0.38 | 0.08 | 0.08 | 0.08 | 0.08 | 0.04 | 73.08 | 3.85 | 3.85 | 57.69 | 3.85 | 3.85 | 3.85 | 92.31 | 1648.85 | | 388.08 | 0.00 |
| UIL.21.14569 | Milk Powder (Majan) | 29.21 | 20.19 | 3.33 | 5.69 | 0.00 | 329.74 | 47.83 | 1.83 | 0.10 | 0.12 | 0.10 | 45.88 | 24.10 | 40.99 | 2187.30 | | 523.25 | 0.84 |
| **Sample ID  (from lab)** | **Name of Product & Brand** | **Amounts per 100 g/ml from Laboratory Analysis** | | | | | | | | | | | | | | **Amounts  per 100 g/ml calculated** | | | |
| **Total Fat (g)** | **SFA  (g)** | **PUFA (g)** | **MUFA (g)** | **TFA  (g)** | **Sodium (mg)** | **Total Sugars (g)** | **Glucose (g)** | **Fructose (g)** | **Sucrose (g)** | **Maltosa (g)** | **Lactose (g)** | **Protein (g)** | **Carbo-hydrate (g)** | **Energy (kJ)** | | **Energy (kcal)** | **Salt  (g)** |
| UIL.21.14570 | Milk Powder (Almudhish) | 29.52 | 19.24 | 3.10 | 6.49 | 0.70 | 280.95 | 38.95 | 0.10 | 0.10 | 0.10 | 0.10 | 38.95 | 24.88 | 40.39 | 2201.83 | | 526.76 | 0.71 |
| UIL.21.13552 | Strwaberry Milk (Asafwah) | 2.42 | 1.78 | 0.12 | 0.50 | 0.00 | 58.30 | 14.14 | 0.10 | 0.10 | 7.93 | 0.00 | 6.21 | 3.42 | 14.15 | 388.23 | | 92.06 | 0.15 |
| UIL.21.13553 | Strawberry Flavored Milk | 2.50 | 1.74 | 0.17 | 0.58 | 0.00 | 58.08 | 12.03 | 0.04 | 0.04 | 6.98 | 0.04 | 5.05 | 3.04 | 12.13 | 350.50 | | 83.21 | 0.15 |
| UIL.21.13554 | Strwberry Fresh Milk (Alrawabi) | 3.28 | 2.32 | 0.15 | 0.79 | 0.00 | 150.60 | 11.77 | 0.00 | 0.00 | 7.09 | 0.00 | 4.68 | 4.05 | 11.45 | 385.01 | | 91.56 | 0.38 |
| UIL.21.14171 | Strawberry Flavored Milk (Lacnor) | 3.26 | 1.94 | 0.41 | 0.91 | 0.00 | 69.50 | 9.84 | 0.10 | 0.10 | 5.06 | 0.10 | 4.78 | 2.82 | 10.96 | 354.88 | | 84.46 | 0.18 |
| UIL.21.14170 | Strawberry Milk (Nada) | 3.21 | 2.27 | 0.16 | 0.78 | 0.00 | 48.90 | 9.67 | 0.10 | 0.10 | 5.75 | 0.10 | 3.92 | 2.18 | 11.68 | 354.39 | | 84.33 | 0.12 |
| UIL.21.14129 | Evaporated Milk (Rainbow) | 8.85 | 6.25 | 0.60 | 1.94 | 0.06 | 105.30 | 9.54 | 0.10 | 0.10 | 0.10 | 0.10 | 9.54 | 5.94 | 10.57 | 608.12 | | 145.69 | 0.27 |
| UIL.21.14130 | Tea Milk (Almudhish) | 8.12 | 4.05 | 1.22 | 2.83 | 0.02 | 105.60 | 9.28 | 0.10 | 0.10 | 0.10 | 0.10 | 9.28 | 5.49 | 10.46 | 571.59 | | 136.88 | 0.27 |
| UIL.21.13551 | Mazoon Fresh Milk Strawberry Flavour | 3.21 | 2.36 | 0.16 | 0.68 | 0.01 | 54.20 | 6.47 | 0.10 | 0.10 | 3.47 | 0.10 | 3.00 | 3.07 | 10.75 | 353.71 | | 84.17 | 0.14 |
| UIL.21.13849 | Power Horse Energy | 0.00 | 0.00 | 0.00 | 0.00 | 0.00 | 66.24 | 11.28 | 5.84 | 3.44 | 2.00 | 0.04 | 0.04 | 0.04 | 11.82 | 201.55 | | 47.42 | 0.17 |
| UIL.21.14173 | Energy Drink (Red Bull) | 0.01 | 0.00 | 0.00 | 0.00 | 0.00 | 45.20 | 10.15 | 4.18 | 2.41 | 3.56 | 0.10 | 0.10 | 0.01 | 11.58 | 197.40 | | 46.45 | 0.11 |
| UIL.21.14178 | Vitaene Extra (Pokka) | 0.01 | 0.00 | 0.00 | 0.00 | 0.00 | 0.00 | 13.36 | 4.90 | 7.95 | 0.08 | 0.24 | 0.27 | 0.01 | 14.78 | 251.63 | | 59.21 | 0.00 |
| UIL.21.14176 | Mountain Dew | 0.01 | 0.00 | 0.00 | 0.00 | 0.00 | 15.60 | 11.55 | 4.03 | 4.28 | 3.24 | 0.10 | 0.10 | 0.01 | 12.31 | 209.81 | | 49.37 | 0.04 |
| UIL.21.14175 | Pepsi | 0.01 | 0.00 | 0.00 | 0.00 | 0.00 | 10.40 | 9.98 | 4.96 | 4.94 | 0.09 | 0.10 | 0.10 | 0.01 | 10.20 | 173.94 | | 40.93 | 0.03 |
| UIL.21.14174 | Coca Cola | 0.01 | 0.00 | 0.00 | 0.00 | 0.00 | 15.30 | 9.78 | 4.59 | 4.69 | 0.50 | 0.10 | 0.10 | 0.01 | 10.95 | 186.69 | | 43.93 | 0.04 |
| UIL.21.14172 | Lipton Peach Ice Tea | 0.01 | 0.00 | 0.00 | 0.00 | 0.00 | 10.60 | 4.40 | 1.16 | 1.52 | 1.72 | 0.10 | 0.10 | 0.10 | 4.51 | 78.74 | | 18.53 | 0.03 |
| UIL.21.14177 | Malt Beverage (Barbican) | 0.01 | 0.00 | 0.00 | 0.00 | 0.00 | 10.20 | 2.22 | 0.34 | 0.13 | 0.75 | 1.00 | 0.10 | 0.26 | 2.97 | 55.28 | | 13.01 | 0.03 |

**Table 5**: Creation of Front of Pack (FoP) nutrition labelling in units of mass and units per portion

| **Sr.No** | **Sample ID (from lab)** | **Name of Product & Brand** | **Portion (g/ml)** | **Nutrient Profile Group** | **Food Item** | **Energy (kJ  per 100 g)** | **Energy (kcal  per 100 g)** | **Fat (g  per 100g)** | **Fat  (g per serving)** | **FINAL  FAT** | **SFA1 (g  per 100g)** | **SFA1 (g per serving)** | **FINAL  SFA1** | **Sugars (g  per 100g)** | **Sugars (g  per serving)** | **FINAL  Sugars** | **Salt (g per 100g)** | **Salt (g per serving)** | **FINAL  Salt** |
| --- | --- | --- | --- | --- | --- | --- | --- | --- | --- | --- | --- | --- | --- | --- | --- | --- | --- | --- | --- |
| 17 J | UIL.21.14414 | Natural Honey / Alshifa | 100 | 0 | Food | 1421.88 | 334.56 | 0.00 | 0.00 |  | 0.00 | 0.00 |  | 80.30 | 80.30 |  | 0.00 | 0.00 |  |
| 15 J | UIL.21.14412 | Pure honey / Capilano | 100 | 0 | Food | 1392.98 | 327.76 | 0.00 | 0.00 |  | 0.00 | 0.00 |  | 81.00 | 81.00 |  | 0.00 | 0.00 |  |
| FA19 | UIL.21.13442 | Batook Specialmint Chewing Gum | 2.5 | 1 | Food | 1572.00 | 370.00 | 0.40 | 0.01 |  | 0.08 | 0.00 |  | 2.00 | 0.05 |  | 0.00 | 0.00 |  |
| FA16 | UIL.21.13439 | Bounty Minis | 28.5 | 1 | Food | 1843.66 | 438.02 | 14.34 | 4.09 |  | 8.38 | 2.39 |  | 15.02 | 4.28 |  | 0.82 | 0.23 |  |
| SI3 | UIL.21.13560 | Cream Caramel Almaraei | 100 | 1 | Food | 524.34 | 124.03 | 2.23 | 2.23 |  | 1.66 | 1.66 |  | 20.92 | 20.92 |  | 0.15 | 0.15 |  |
| 13 J | UIL.21.14410 | Custard Powder / Alalali | 100 | 1 | Food | 1543.29 | 363.13 | 0.01 | 0.01 |  | 0.00 | 0.00 |  | 0.10 | 0.10 |  | 0.21 | 0.21 |  |
| J12 | UIL.21.14409 | Custard Powder/Tiara | 100 | 1 | Food | 1509.10 | 355.15 | 0.23 | 0.23 |  | 0.14 | 0.14 |  | 0.21 | 0.21 |  | 0.00 | 0.00 |  |
| A15 | UIL.21.14396 | Daily Fresh/ Custard Powder | 100 | 1 | Food | 1444.20 | 340.00 | 0.64 | 0.64 |  | 0.21 | 0.21 |  | 3.07 | 3.07 |  | 1.78 | 1.78 |  |
| FA49 | UIL.21.13550 | Danet Cream Caramel | 100 | 1 | Food | 486.20 | 115.05 | 2.21 | 2.21 |  | 1.59 | 1.59 |  | 17.80 | 17.80 |  | 0.16 | 0.16 |  |
| FA18 | UIL.21.13441 | Extra Peppermint | 1.9 | 1 | Food | 2166.84 | 510.00 | 0.53 | 0.01 |  | 0.11 | 0.00 |  | 52.63 | 1.00 |  | 0.00 | 0.00 |  |
| FA12 | UIL.21.13435 | Kinder Joy | 100 | 1 | Food | 2279.29 | 545.78 | 32.22 | 32.22 |  | 15.15 | 15.15 |  | 49.62 | 49.62 |  | 0.49 | 0.49 |  |
| FA14 | UIL.21.13437 | Kitkat | 100 | 1 | Food | 2157.18 | 515.01 | 25.29 | 25.29 |  | 13.76 | 13.76 |  | 45.37 | 45.37 |  | 0.19 | 0.19 |  |
| FA17 | UIL.21.13440 | Mars Minis | 13 | 1 | Food | 1989.15 | 473.31 | 17.92 | 2.33 |  | 11.54 | 1.50 |  | 57.77 | 7.51 |  | 0.56 | 0.07 |  |
| FA21 | UIL.21.13444 | Mentos Sugar free Chewing Gum | 1.75 | 1 | Food | 1624.00 | 382.29 | 0.57 | 0.01 |  | 0.11 | 0.00 |  | 32.00 | 0.56 |  | 0.00 | 0.00 |  |
| A10 | UIL.21.14391 | Nutella Hazelnut Spread With Cocoa | 100 | 1 | Food | 2282.86 | 546.32 | 31.20 | 31.20 |  | 10.53 | 10.53 |  | 57.94 | 57.94 |  | 0.11 | 0.11 |  |
| FA15 | UIL.21.13438 | Snickers Minis | 15 | 1 | Food | 2130.60 | 509.20 | 26.80 | 4.02 |  | 6.73 | 1.01 |  | 52.53 | 7.88 |  | 0.67 | 0.10 |  |
| H10 | UIL.21.13454 | Twix Minis | 20 | 1 | Food | 2192.55 | 523.35 | 25.35 | 5.07 |  | 11.45 | 2.29 |  | 48.60 | 9.72 |  | 0.47 | 0.09 |  |
| FA20 | UIL.21.13443 | Wrigleys Doublemint Chewing Gum | 2.6 | 1 | Food | 1583.46 | 372.69 | 0.38 | 0.01 |  | 0.08 | 0.00 |  | 81.54 | 2.12 |  | 0.00 | 0.00 |  |
| A3 | UIL.21.14384 | Al Mudhish Puffed Corn Cheese Balls | 12 | 2 | Food | 2369.67 | 568.08 | 35.75 | 4.29 |  | 16.58 | 1.99 |  | 4.42 | 0.53 |  | 1.58 | 0.19 |  |
| FA10 | UIL.21.13433 | Alrifai (Mixed Nuts) | 28 | 2 | Food | 2243.49 | 537.42 | 32.43 | 9.08 |  | 4.64 | 1.30 |  | 7.18 | 2.01 |  | 0.61 | 0.17 |  |
| FA8 | UIL.21.13431 | American Garden Popcorn Butter | 33 | 2 | Food | 1972.12 | 471.21 | 24.42 | 8.06 |  | 10.91 | 3.60 |  | 0.30 | 0.10 |  | 2.50 | 0.83 |  |
| FA9 | UIL.21.13432 | Best Salted Mixed Nuts | 100 | 2 | Food | 2669.29 | 643.33 | 51.89 | 51.89 |  | 8.31 | 8.31 |  | 4.28 | 4.28 |  | 0.85 | 0.85 |  |
| J25 | UIL.21.17408 | Cheese Balls (Pofak Oman) | 15 | 2 | Food | 2437.67 | 583.67 | 34.33 | 5.15 |  | 7.67 | 1.15 |  | 7.47 | 1.12 |  | 3.92 | 0.59 |  |
| J53 | UIL.21.14418 | Cheese pastry (Dhahabi) | 100 | 2 | Food | 2415.34 | 579.83 | 39.15 | 39.15 |  | 16.79 | 16.79 |  | 4.17 | 4.17 |  | 1.50 | 1.50 |  |
| J65 | UIL.21.14551 | Cheetos / Flamin Hot | 100 | 2 | Food | 1585.62 | 378.54 | 18.54 | 18.54 |  | 4.74 | 4.74 |  | 3.85 | 3.85 |  | 0.78 | 0.78 |  |
| A1 | UIL.21.13463 | Cheez Balls (Mr. Krispy) | 30 | 2 | Food | 2394.93 | 573.70 | 34.63 | 10.39 |  | 9.73 | 2.92 |  | 1.07 | 0.32 |  | 1.78 | 0.53 |  |
| A5 | UIL.21.14386 | chips Oman | 100 | 2 | Food | 2355.38 | 565.61 | 38.77 | 38.77 |  | 16.89 | 16.89 |  | 0.00 | 0.00 |  | 1.28 | 1.28 |  |
| A2 | UIL.21.14383 | Lay's (Salt) | 14 | 2 | Food | 2354.14 | 564.36 | 35.50 | 4.97 |  | 16.07 | 2.25 |  | 0.00 | 0.00 |  | 1.51 | 0.21 |  |
| A9 | UIL.21.14390 | Mani (Mixed Nuts ) | 100 | 2 | Food | 2589.53 | 623.81 | 49.33 | 49.33 |  | 7.92 | 7.92 |  | 8.55 | 8.55 |  | 0.80 | 0.80 |  |
| H14 | UIL.21.13458 | Nabil Cracker Salted Biscuits | 100 | 2 | Food | 1995.78 | 475.26 | 19.26 | 19.26 |  | 13.50 | 13.50 |  | 20.04 | 20.04 |  | 2.54 | 2.54 |  |
| A8 | UIL.21.14389 | Popcorn Cheese / American Garden | 33 | 2 | Food | 2202.39 | 528.27 | 34.21 | 11.29 |  | 15.67 | 5.17 |  | 0.00 | 0.00 |  | 2.51 | 0.83 |  |
| A4 | UIL.21.14385 | potato chips ready salted | 28 | 2 | Food | 2343.21 | 561.96 | 36.11 | 10.11 |  | 15.75 | 4.41 |  | 0.00 | 0.00 |  | 1.36 | 0.38 |  |
| H18 | UIL.21.13462 | Pringles Original | 100 | 2 | Food | 2303.16 | 551.77 | 33.49 | 33.49 |  | 3.53 | 3.53 |  | 1.05 | 1.05 |  | 1.15 | 1.15 |  |
| A7 | UIL.21.14388 | Shai ( Mix Nut) | 100 | 2 | Food | 2572.58 | 619.56 | 48.44 | 48.44 |  | 6.87 | 6.87 |  | 6.85 | 6.85 |  | 0.38 | 0.38 |  |
| J74 | UIL.21.14560 | Sohar Chips | 100 | 2 | Food | 2285.15 | 547.20 | 32.36 | 32.36 |  | 14.31 | 14.31 |  | 0.00 | 0.00 |  | 2.41 | 2.41 |  |

| **Sr.No** | **Sample ID (from lab)** | **Name of Product & Brand** | **Portion (g/ml)** | **Nutrient Profile Group** | **Food Item** | **Energy (kJ  per 100 g)** | **Energy (kcal  per 100 g)** | **Fat (g  per 100g)** | **Fat  (g per serving)** | **FINAL  FAT** | **SFA1 (g  per 100g)** | **SFA1 (g per serving)** | **FINAL  SFA1** | **Sugars (g  per 100g)** | **Sugars (g  per serving)** | **FINAL  Sugars** | **Salt (g per 100g)** | **Salt (g per serving)** | **FINAL  Salt** |
| --- | --- | --- | --- | --- | --- | --- | --- | --- | --- | --- | --- | --- | --- | --- | --- | --- | --- | --- | --- |
| J51 | UIL.21.13833 | vanilla ice cream (Igloo) | 53 | 4 | Food | 824.38 | 197.25 | 11.13 | 5.90 |  | 6.68 | 3.54 |  | 18.60 | 9.86 |  | 0.17 | 0.09 |  |
| J52 | UIL.21.13832 | vanilla ice cream (Mazoon) | 100 | 4 | Food | 569.36 | 136.22 | 7.66 | 7.66 |  | 4.46 | 4.46 |  | 12.37 | 12.37 |  | 0.12 | 0.12 |  |
| FA5 | UIL.21.13300 | KELLOGG'S Coco Pops | 100 | 5 | Food | 1624.48 | 382.96 | 2.48 | 2.48 |  | 1.15 | 1.15 |  | 24.48 | 24.48 |  | 0.00 | 0.00 |  |
| A6 | UIL.21.14387 | Kellogg's special (cereal) | 39 | 5 | Food | 1631.64 | 384.56 | 2.21 | 0.86 |  | 0.59 | 0.23 |  | 13.92 | 5.43 |  | 1.77 | 0.69 |  |
| FA4 | UIL.21.13299 | NESTLE Chocapic | 100 | 5 | Food | 1721.17 | 406.39 | 4.79 | 4.79 |  | 1.50 | 1.50 |  | 24.95 | 24.95 |  | 0.26 | 0.26 |  |
| FA3 | UIL.21.13298 | Nestle Gold Corn Flakes | 100 | 5 | Food | 1626.83 | 383.36 | 1.96 | 1.96 |  | 0.38 | 0.38 |  | 10.57 | 10.57 |  | 1.08 | 1.08 |  |
| A34 | UIL.21.14574 | 7 days mini croissant | 11 | 6 | Food | 1969.55 | 471.82 | 28.55 | 3.14 |  | 16.73 | 1.84 |  | 16.82 | 1.85 |  | 0.52 | 0.06 |  |
| H16 | UIL.21.13460 | Americana Premium Butter Cookies | 100 | 6 | Food | 2053.55 | 489.15 | 20.27 | 20.27 |  | 9.16 | 9.16 |  | 29.40 | 29.40 |  | 0.29 | 0.29 |  |
| J57 | UIL.21.14552 | Apple pastry | 100 | 6 | Food | 1513.98 | 360.86 | 15.74 | 15.74 |  | 8.37 | 8.37 |  | 16.32 | 16.32 |  | 0.03 | 0.03 |  |
| J56 | UIL.21.17405 | Apple puff (Lusine) | 70 | 6 | Food | 1450.54 | 345.16 | 13.10 | 9.17 |  | 5.89 | 4.12 |  | 19.66 | 13.76 |  | 0.70 | 0.49 |  |
| H31 | UIL.21.14566 | Atyab Twin Cake Vanilla | 100 | 6 | Food | 1736.42 | 413.99 | 18.43 | 18.43 |  | 7.17 | 7.17 |  | 27.82 | 27.82 |  | 0.56 | 0.56 |  |
| H7 | UIL.21.13451 | Britannia Chocolate Flavoured Premium Crème Wafer | 32 | 6 | Food | 2152.25 | 513.88 | 25.38 | 8.12 |  | 15.75 | 5.04 |  | 33.81 | 10.82 |  | 0.63 | 0.20 |  |
| J55 | UIL.21.17406 | Cheese Puff (Lusine) | 70 | 6 | Food | 1602.89 | 383.63 | 22.03 | 15.42 |  | 10.30 | 7.21 |  | 8.77 | 6.14 |  | 1.56 | 1.10 |  |
| J58 | UIL.21.14568 | Chocolate jumbo croissant | 100 | 6 | Food | 1763.93 | 422.01 | 23.69 | 23.69 |  | 13.05 | 13.05 |  | 12.08 | 12.08 |  | 0.51 | 0.51 |  |
| J67H32 | UIL.21.17531 | Croissant (Dhahabi) | 100 | 6 | Food | 1832.10 | 437.90 | 23.18 | 23.18 |  | 10.21 | 10.21 |  | 11.95 | 11.95 |  | 1.58 | 1.58 |  |
| H17 | UIL.21.13461 | Danish Butter Cookies | 100 | 6 | Food | 2138.08 | 510.56 | 25.44 | 25.44 |  | 18.34 | 18.34 |  | 26.04 | 26.04 |  | 0.32 | 0.32 |  |
| J54 | UIL.21.17407 | Donut (Switz) | 35 | 6 | Food | 1699.29 | 405.00 | 17.57 | 6.15 |  | 5.57 | 1.95 |  | 19.74 | 6.91 |  | 0.61 | 0.21 |  |
| H13 | UIL.21.13457 | Lotus Biscoff | 7.8 | 6 | Food | 2065.38 | 491.67 | 19.36 | 1.51 |  | 13.59 | 1.06 |  | 36.41 | 2.84 |  | 1.05 | 0.08 |  |
| H2 | UIL.21.13446 | Nabil cream wafers (chocolate flavour) | 100 | 6 | Food | 2077.35 | 495.05 | 21.29 | 21.29 |  | 12.74 | 12.74 |  | 20.63 | 20.63 |  | 0.37 | 0.37 |  |
| H1 | UIL.21.13445 | Nabil glucose | 100 | 6 | Food | 1940.11 | 460.72 | 14.36 | 14.36 |  | 7.42 | 7.42 |  | 14.88 | 14.88 |  | 0.00 | 0.00 |  |
| H3 | UIL.21.13447 | Nabil Nice (sugar sprinkled coconut biscuits) | 100 | 6 | Food | 1949.91 | 463.32 | 15.36 | 15.36 |  | 7.12 | 7.12 |  | 21.16 | 21.16 |  | 0.95 | 0.95 |  |
| H8 | UIL.21.13452 | Nutro Chocolate Flavoured Cream Wafers | 30 | 6 | Food | 2239.97 | 535.93 | 30.20 | 9.06 |  | 26.80 | 8.04 |  | 36.17 | 10.85 |  | 0.52 | 0.16 |  |
| H15 | UIL.21.13459 | Original Oreo | 19 | 6 | Food | 2027.74 | 482.84 | 19.47 | 3.70 |  | 8.79 | 1.67 |  | 42.11 | 8.00 |  | 1.48 | 0.28 |  |
| H30 | UIL.21.14567 | Switz Mini Cup Cake Vanilla | 32 | 6 | Food | 2035.25 | 487.53 | 29.41 | 9.41 |  | 12.75 | 4.08 |  | 29.00 | 9.28 |  | 1.03 | 0.33 |  |
| H9 | UIL.21.13453 | Tiffany Crunch And Cream | 100 | 6 | Food | 2147.08 | 512.36 | 24.36 | 24.36 |  | 21.51 | 21.51 |  | 36.23 | 36.23 |  | 0.31 | 0.31 |  |
| H5 | UIL.21.13449 | Tiffany Everyday Nice (Sugar Sprinkled Coconut Biscuits) | 31 | 6 | Food | 2073.55 | 493.87 | 20.32 | 6.30 |  | 9.16 | 2.84 |  | 25.48 | 7.90 |  | 0.90 | 0.28 |  |
| H4 | UIL.21.13448 | Tiffany Glucose (Milk and Honey Biscuits) | 31 | 6 | Food | 2014.55 | 479.26 | 17.84 | 5.53 |  | 9.16 | 2.84 |  | 22.90 | 7.10 |  | 0.91 | 0.28 |  |
| FA48 | UIL.21.17403 | Activia Full Fat Fresh Laban | 100 | 7 | Drink | 254.81 | 60.92 | 3.28 | 3.28 |  | 2.26 | 2.26 |  | 4.46 | 4.46 |  | 0.13 | 0.13 |  |
| FA41 | UIL.21.17409 | Activia Full Fat Plain Yoghurt | 100 | 7 | Food | 187.69 | 44.77 | 2.08 | 2.08 |  | 1.53 | 1.53 |  | 3.32 | 3.32 |  | 0.09 | 0.09 |  |
| FA32 | UIL.21.13544 | Almarai Fresh Laban Full Fat | 180 | 7 | Drink | 260.74 | 62.42 | 3.64 | 6.56 |  | 2.57 | 4.63 |  | 4.09 | 7.36 |  | 0.14 | 0.25 |  |
| FA34 | UIL.21.13545 | Almarai Laban Up | 200 | 7 | Drink | 160.94 | 38.21 | 1.15 | 2.29 |  | 0.81 | 1.62 |  | 3.99 | 7.97 |  | 0.80 | 1.61 |  |
| FA33 | UIL.21.13548 | Almarai Strawberry Laban | 340 | 7 | Drink | 371.94 | 87.91 | 1.36 | 4.63 |  | 0.91 | 3.09 |  | 15.29 | 52.00 |  | 0.14 | 0.48 |  |
| F40 | UIL.21.13546 | Alrawabi Up: Laban Drink | 100 | 7 | Drink | 157.69 | 37.63 | 1.79 | 1.79 |  | 1.20 | 1.20 |  | 3.04 | 3.04 |  | 0.00 | 0.00 |  |
| FA42 | UIL.21.17404 | Balade Farms Ayran Original Laban | 100 | 7 | Drink | 132.84 | 31.63 | 1.27 | 1.27 |  | 1.02 | 1.02 |  | 0.00 | 0.00 |  | 0.95 | 0.95 |  |
| J64 | UIL.21.14131 | Cream (Luna) | 100 | 7 | Food | 905.27 | 219.39 | 21.71 | 21.71 |  | 16.71 | 16.71 |  | 3.10 | 3.10 |  | 0.00 | 0.00 |  |

| **Sr.No** | **Sample ID (from lab)** | **Name of Product & Brand** | **Portion (g/ml)** | **Nutrient Profile Group** | **Food Item** | **Energy (kJ  per 100 g)** | **Energy (kcal  per 100 g)** | **Fat (g  per 100g)** | **Fat  (g per serving)** | **FINAL  FAT** | **SFA1 (g  per 100g)** | **SFA1 (g per serving)** | **FINAL  SFA1** | **Sugars (g  per 100g)** | **Sugars (g  per serving)** | **FINAL  Sugars** | **Salt (g per 100g)** | **Salt (g per serving)** | **FINAL  Salt** |
| --- | --- | --- | --- | --- | --- | --- | --- | --- | --- | --- | --- | --- | --- | --- | --- | --- | --- | --- | --- |
| J21 | UIL.21.14553 | Cream (Puck) | 100 | 7 | Food | 1000.88 | 242.71 | 24.51 | 24.51 |  | 11.62 | 11.62 |  | 0.00 | 0.00 |  | 0.01 | 0.01 |  |
| J50 | UIL.21.13539 | Fresh Laban (Alrawabi) | 100 | 7 | Drink | 255.29 | 61.03 | 3.27 | 3.27 |  | 2.29 | 2.29 |  | 3.97 | 3.97 |  | 0.00 | 0.00 |  |
| F35 | UIL.21.13594 | Fresh Labneh, Full Fat Al-Marai | 100 | 7 | Food | 644.71 | 154.97 | 11.13 | 11.13 |  | 7.82 | 7.82 |  | 6.63 | 6.63 |  | 0.54 | 0.54 |  |
| F33 | UIL.21.13592 | Fresh Labneh: Full Fat Mazoon | 55 | 7 | Food | 726.60 | 174.75 | 12.85 | 7.07 |  | 8.82 | 4.85 |  | 7.33 | 4.03 |  | 0.57 | 0.31 |  |
| F36 | UIL.21.13558 | Fresh Yougurt Full Fat: Al-Marai | 170 | 7 | Drink | 303.34 | 72.44 | 3.61 | 6.14 |  | 2.57 | 4.37 |  | 5.62 | 9.55 |  | 0.18 | 0.31 |  |
| F37 | UIL.21.13556 | Fresh Yougurt Full Fat: Al-Safwah | 100 | 7 | Drink | 278.97 | 66.59 | 3.23 | 3.23 |  | 2.01 | 2.01 |  | 4.78 | 4.78 |  | 0.18 | 0.18 |  |
| J26 | UIL.21.13549 | Laban Drink (Unikai) | 100 | 7 | Drink | 137.54 | 32.58 | 0.74 | 0.74 |  | 0.48 | 0.48 |  | 3.02 | 3.02 |  | 4.76 | 4.76 |  |
| J75 | UIL.21.14179 | Laban Drinks (Alkhamayil) | 100 | 7 | Drink | 126.18 | 29.86 | 0.58 | 0.58 |  | 0.37 | 0.37 |  | 0.89 | 0.89 |  | 0.00 | 0.00 |  |
| J28 | UIL.21.13543 | Laban Fresh Full Cream (Asafwah) | 100 | 7 | Drink | 265.44 | 63.43 | 3.31 | 3.31 |  | 2.37 | 2.37 |  | 4.07 | 4.07 |  | 0.17 | 0.17 |  |
| J27 | UIL.21.13541 | Laban Up (Alsafwa) | 100 | 7 | Drink | 168.87 | 40.19 | 1.55 | 1.55 |  | 1.04 | 1.04 |  | 3.89 | 3.89 |  | 0.87 | 0.87 |  |
| F34 | UIL.21.13593 | Labneh Turkish Recipe: Puck | 100 | 7 | Food | 786.38 | 189.21 | 14.21 | 14.21 |  | 9.82 | 9.82 |  | 6.43 | 6.43 |  | 0.79 | 0.79 |  |
| FA35 | UIL.21.13542 | Mazoon Fresh Laban Full Fat | 100 | 7 | Drink | 270.51 | 64.62 | 3.30 | 3.30 |  | 2.22 | 2.22 |  | 4.48 | 4.48 |  | 0.13 | 0.13 |  |
| FA38 | UIL.21.13555 | Mazoon Fresh Yoghurt Full Fat | 100 | 7 | Food | 285.20 | 68.05 | 3.21 | 3.21 |  | 2.29 | 2.29 |  | 5.04 | 5.04 |  | 0.15 | 0.15 |  |
| FA37 | UIL.21.13540 | Mazoon Laban Up | 100 | 7 | Drink | 128.47 | 30.49 | 0.89 | 0.89 |  | 0.60 | 0.60 |  | 3.70 | 3.70 |  | 0.88 | 0.88 |  |
| FA40 | UIL.21.14180 | Mazoon Sambharam Spicy Laban Drink | 100 | 7 | Drink | 121.04 | 28.73 | 0.85 | 0.85 |  | 0.54 | 0.54 |  | 1.68 | 1.68 |  | 0.90 | 0.90 |  |
| FA36 | UIL.21.13547 | Mazoon Strawberry Laban | 100 | 7 | Drink | 429.18 | 102.01 | 3.49 | 3.49 |  | 2.30 | 2.30 |  | 14.27 | 14.27 |  | 0.14 | 0.14 |  |
| A23 | UIL.21.13830 | Nestle cream | 100 | 7 | Food | 1003.11 | 242.92 | 23.44 | 23.44 |  | 13.40 | 13.40 |  | 0.00 | 0.00 |  | 0.00 | 0.00 |  |
| F39 | UIL.21.13557 | Yoghurt: Full Cream Unikai | 100 | 7 | Food | 259.98 | 62.11 | 3.19 | 3.19 |  | 2.41 | 2.41 |  | 4.41 | 4.41 |  | 0.21 | 0.21 |  |
| F38 | UIL.21.13559 | Youghurt;Full Cream AlRawabi | 100 | 7 | Drink | 288.22 | 68.79 | 3.31 | 3.31 |  | 2.37 | 2.37 |  | 4.85 | 4.85 |  | 0.22 | 0.22 |  |
| FA31 | UIL.21.13840 | Almarai Burger Slice Cheese | 20 | 9 | Food | 1292.25 | 311.50 | 25.30 | 5.06 |  | 15.15 | 3.03 |  | 0.00 | 0.00 |  | 3.50 | 0.70 |  |
| FA27 | UIL.21.13845 | Almarai Cream Cheese | 30 | 9 | Food | 1422.63 | 344.77 | 34.10 | 10.23 |  | 25.13 | 7.54 |  | 0.00 | 0.00 |  | 1.89 | 0.57 |  |
| FA28 | UIL.21.13844 | Almarai Cream Cheese Cheddar | 30 | 9 | Food | 1393.10 | 336.87 | 30.87 | 9.26 |  | 15.50 | 4.65 |  | 0.00 | 0.00 |  | 2.93 | 0.88 |  |
| J23 | UIL.21.14572 | Chedder cheese (Almarai) | 30 | 9 | Food | 1228.07 | 296.30 | 24.97 | 7.49 |  | 16.77 | 5.03 |  | 0.00 | 0.00 |  | 4.82 | 1.45 |  |
| J22 | UIL.21.14571 | Chedder cheese (Kraft) | 100 | 9 | Food | 1272.12 | 306.84 | 25.56 | 25.56 |  | 17.84 | 17.84 |  | 0.00 | 0.00 |  | 4.57 | 4.57 |  |
| A19 | UIL.21.13837 | Cheese Triangles Al Maraai | 30 | 9 | Food | 1245.83 | 301.17 | 27.30 | 8.19 |  | 17.87 | 5.36 |  | 0.00 | 0.00 |  | 2.42 | 0.73 |  |
| A18 | UIL.21.13838 | Cheese Triangles Puck | 100 | 9 | Food | 1187.34 | 286.88 | 25.52 | 25.52 |  | 12.95 | 12.95 |  | 0.00 | 0.00 |  | 2.79 | 2.79 |  |
| F32 | UIL.21.13835 | Haloumi Cheese Al-Marai | 100 | 9 | Food | 1437.78 | 345.91 | 25.87 | 25.87 |  | 14.12 | 14.12 |  | 0.00 | 0.00 |  | 4.82 | 4.82 |  |
| F31 | UIL.21.13834 | Haloumi Pinar | 30 | 9 | Food | 1468.50 | 353.50 | 27.10 | 8.13 |  | 24.20 | 7.26 |  | 0.00 | 0.00 |  | 3.19 | 0.96 |  |
| FA22 | UIL.21.13848 | Kraft Cheddar Cheese Spread Original | 100 | 9 | Food | 1257.12 | 304.09 | 28.21 | 28.21 |  | 19.12 | 19.12 |  | 0.00 | 0.00 |  | 3.09 | 3.09 |  |
| FA29 | UIL.21.13839 | Kraft Slice Cheese Original | 100 | 9 | Food | 1181.41 | 284.32 | 21.56 | 21.56 |  | 13.17 | 13.17 |  | 0.00 | 0.00 |  | 3.44 | 3.44 |  |
| FA23 | UIL.21.13843 | Mazoon Spread Cheese | 100 | 9 | Food | 1405.36 | 340.52 | 33.48 | 33.48 |  | 24.12 | 24.12 |  | 0.00 | 0.00 |  | 1.01 | 1.01 |  |
| FA24 | UIL.21.13842 | Mazoon Spread Cheese Cheddar | 100 | 9 | Food | 1401.40 | 339.60 | 33.52 | 33.52 |  | 23.82 | 23.82 |  | 0.00 | 0.00 |  | 1.00 | 1.00 |  |
| H37 | UIL.21.14554 | Pinar Processed Cream Cheese Spread | 100 | 9 | Food | 1288.33 | 312.26 | 31.02 | 31.02 |  | 27.80 | 27.80 |  | 0.00 | 0.00 |  | 1.80 | 1.80 |  |
| FA25 | UIL.21.13847 | Puck Cream Cheese | 100 | 9 | Food | 1367.83 | 331.21 | 31.85 | 31.85 |  | 20.97 | 20.97 |  | 0.00 | 0.00 |  | 2.12 | 2.12 |  |
| FA26 | UIL.21.13846 | Puck Cream Cheese Cheddar | 100 | 9 | Food | 1373.75 | 332.65 | 32.01 | 32.01 |  | 19.20 | 19.20 |  | 0.00 | 0.00 |  | 2.02 | 2.02 |  |
| FA30 | UIL.21.13841 | Puck Slice Cheese Original | 100 | 9 | Food | 1371.75 | 330.90 | 27.66 | 27.66 |  | 14.04 | 14.04 |  | 0.00 | 0.00 |  | 1.55 | 1.55 |  |
| A17 | UIL.21.13836 | Triangle Cheese Abu Alwald | 100 | 9 | Food | 1055.35 | 254.50 | 21.02 | 21.02 |  | 11.92 | 11.92 |  | 0.00 | 0.00 |  | 1.89 | 1.89 |  |

| **Sr.No** | **Sample ID (from lab)** | **Name of Product & Brand** | **Portion (g/ml)** | **Nutrient Profile Group** | **Food Item** | **Energy (kJ  per 100g)** | **Energy (kcal  per 100g)** | **Fat (g  per 100g)** | **Fat  (g per serving)** | **FINAL  FAT** | **SFA1 (g  per 100g)** | **SFA1 (g per serving)** | **FINAL  SFA1** | **Sugars (g  per 100g)** | **Sugars (g  per serving)** | **FINAL  Sugars** | **Salt (g per 100g)** | **Salt (g per serving)** | **FINAL  Salt** |
| --- | --- | --- | --- | --- | --- | --- | --- | --- | --- | --- | --- | --- | --- | --- | --- | --- | --- | --- | --- |
| H12 | UIL.21.13456 | Britannia Toastea Wheat Rusk | 31 | 11 | Food | 1841.10 | 436.06 | 9.74 | 3.02 |  | 4.35 | 1.35 |  | 26.71 | 8.28 |  | 0.57 | 0.18 |  |
| H11 | UIL.21.13455 | Tiffany Whole Wheat Rusks | 100 | 11 | Food | 1794.15 | 424.65 | 8.49 | 8.49 |  | 3.80 | 3.80 |  | 23.11 | 23.11 |  | 0.57 | 0.57 |  |
| FA6 | UIL.21.13429 | Indomie Fried Noodles | 100 | 12 | Food | 1974.24 | 470.68 | 20.92 | 20.92 |  | 11.35 | 11.35 |  | 8.24 | 8.24 |  | 3.47 | 3.47 |  |
| F25 | UIL.21.14202 | Al-Islami Ground Beef | 100 | 14 | Food | 581.61 | 139.57 | 9.25 | 9.25 |  | 4.16 | 4.16 |  | 1.38 | 1.38 |  | 1.07 | 1.07 |  |
| F24 | UIL.21.14203 | Al-Kabeer Jumbo Hot Dogs | 100 | 14 | Food | 647.82 | 154.69 | 7.69 | 7.69 |  | 4.31 | 4.31 |  | 0.00 | 0.00 |  | 1.37 | 1.37 |  |
| F30 | UIL.21.14194 | Al-Safa Breaded Chicken Finger | 100 | 14 | Food | 961.63 | 228.71 | 8.31 | 8.31 |  | 2.56 | 2.56 |  | 0.00 | 0.00 |  | 1.23 | 1.23 |  |
| F29 | UIL.21.14196 | Al-Safa Chicken Burger | 100 | 14 | Food | 738.77 | 176.89 | 10.41 | 10.41 |  | 3.01 | 3.01 |  | 0.00 | 0.00 |  | 1.00 | 1.00 |  |
| F26 | UIL.21.14205 | Al-Safa Chicken Franks | 34 | 14 | Food | 859.15 | 206.53 | 14.88 | 5.06 |  | 8.06 | 2.74 |  | 0.00 | 0.00 |  | 3.30 | 1.12 |  |
| F28 | UIL.21.14204 | Americana Beef Hot dog | 100 | 14 | Food | 756.44 | 181.68 | 12.56 | 12.56 |  | 5.27 | 5.27 |  | 0.00 | 0.00 |  | 1.53 | 1.53 |  |
| J48 | UIL.21.14200 | Beef Burger (Taybat) | 100 | 14 | Food | 933.91 | 223.72 | 13.52 | 13.52 |  | 6.99 | 6.99 |  | 0.00 | 0.00 |  | 1.58 | 1.58 |  |
| F23 | UIL.21.14199 | Beef Burger Sadia | 100 | 14 | Food | 1116.56 | 268.77 | 20.57 | 20.57 |  | 10.32 | 10.32 |  | 0.00 | 0.00 |  | 1.16 | 1.16 |  |
| SI1 | UIL.21.14201 | Corned Beef (Taybat) | 50 | 14 | Food | 741.30 | 176.90 | 8.42 | 4.21 |  | 4.14 | 2.07 |  | 0.54 | 0.27 |  | 0.54 | 0.27 |  |
| H29 | UIL.21.14573 | Family Corned Beef | 100 | 14 | Food | 901.32 | 215.19 | 10.59 | 10.59 |  | 6.54 | 6.54 |  | 4.02 | 4.02 |  | 1.08 | 1.08 |  |
| F22 | UIL.21.14198 | Sadia Chicken Burger | 100 | 14 | Food | 920.71 | 221.12 | 15.24 | 15.24 |  | 5.93 | 5.93 |  | 0.00 | 0.00 |  | 1.51 | 1.51 |  |
| F27 | UIL.21.14206 | Sadia Chicken Franks | 100 | 14 | Food | 844.93 | 203.41 | 15.65 | 15.65 |  | 6.77 | 6.77 |  | 0.00 | 0.00 |  | 1.17 | 1.17 |  |
| F21 | UIL.21.14195 | Sadia Chicken Nuggets Crispy | 100 | 14 | Food | 939.87 | 224.19 | 10.35 | 10.35 |  | 3.21 | 3.21 |  | 0.00 | 0.00 |  | 1.06 | 1.06 |  |
| I20 | UIL.21.13295 | Light Chunks Tuna California Garden In Water | 100 | 15 | Food | 458.47 | 108.19 | 1.07 | 1.07 |  | 0.80 | 0.80 |  | 0.84 | 0.84 |  | 0.55 | 0.55 |  |
| I16 | UIL.21.13291 | Skipjack Tuna Alalali In Sun Flower Oil | 100 | 15 | Food | 868.10 | 207.50 | 11.02 | 11.02 |  | 1.46 | 1.46 |  | 0.80 | 0.80 |  | 1.22 | 1.22 |  |
| I19 | UIL.21.13294 | Skipjack Tuna California Garden In Sun Flower Oil | 100 | 15 | Food | 570.11 | 135.02 | 2.98 | 2.98 |  | 0.36 | 0.36 |  | 0.89 | 0.89 |  | 0.77 | 0.77 |  |
| I17 | UIL.21.13292 | Tuna Alalali In Water | 100 | 15 | Food | 450.53 | 106.01 | 0.01 | 0.01 |  | 0.00 | 0.00 |  | 0.89 | 0.89 |  | 1.22 | 1.22 |  |
| FA11 | UIL.21.13434 | White Tuna Meat In Brine | 100 | 15 | Food | 490.75 | 115.65 | 0.61 | 0.61 |  | 0.46 | 0.46 |  | 0.10 | 0.10 |  | 0.97 | 0.97 |  |
| I18 | UIL.21.13293 | White Tuna Meat In Sun Flower Oil Delmonte | 100 | 15 | Food | 677.53 | 161.06 | 5.58 | 5.58 |  | 0.80 | 0.80 |  | 0.36 | 0.36 |  | 1.08 | 1.08 |  |
| I14 | UIL.21.13289 | Baked Beans Almazraa | 100 | 17 | Food | 311.63 | 73.71 | 1.31 | 1.31 |  | 0.26 | 0.26 |  | 0.74 | 0.74 |  | 0.39 | 0.39 |  |
| I7 | UIL.21.13282 | Baked Beans California Garden | 130 | 17 | Food | 539.62 | 127.15 | 0.63 | 0.82 |  | 0.16 | 0.21 |  | 6.12 | 7.96 |  | 1.00 | 1.30 |  |
| I3 | UIL.21.13278 | Boildchick Peas Mara | 130 | 17 | Food | 343.86 | 81.26 | 1.20 | 1.56 |  | 0.38 | 0.49 |  | 10.40 | 13.52 |  | 0.79 | 1.03 |  |
| I11 | UIL.21.13286 | Chick Peas Almazraa | 130 | 17 | Food | 399.49 | 94.18 | 0.61 | 0.79 |  | 0.11 | 0.14 |  | 0.81 | 1.05 |  | 0.75 | 0.97 |  |
| I6 | UIL.21.13281 | Chick Peas California Garden | 130 | 17 | Food | 484.32 | 114.15 | 0.64 | 0.83 |  | 0.13 | 0.17 |  | 0.84 | 1.09 |  | 0.68 | 0.88 |  |
| I9 | UIL.21.13284 | Chick Peas Luna | 100 | 17 | Food | 418.75 | 99.00 | 1.60 | 1.60 |  | 0.74 | 0.74 |  | 0.76 | 0.76 |  | 0.88 | 0.88 |  |
| A16 | UIL.21.14397 | Diamond Strawberry Jam | 100 | 17 | Food | 1148.09 | 270.23 | 0.31 | 0.31 |  | 0.27 | 0.27 |  | 63.84 | 63.84 |  | 0.04 | 0.04 |  |
| I8 | UIL.21.13283 | Foul Medamas Almazraa | 130 | 17 | Food | 345.12 | 81.21 | 0.01 | 0.01 |  | 0.00 | 0.00 |  | 0.77 | 1.00 |  | 1.10 | 1.43 |  |
| J76 | UIL.21.14557 | Foul Medammas (American Garden) | 130 | 17 | Food | 397.43 | 93.52 | 0.01 | 0.01 |  | 0.00 | 0.00 |  | 1.22 | 1.59 |  | 0.87 | 1.13 |  |
| I1 | UIL.21.13276 | Green Giant Sweet Corn | 80 | 17 | Food | 352.10 | 83.33 | 1.63 | 1.30 |  | 0.38 | 0.30 |  | 7.48 | 5.98 |  | 0.52 | 0.41 |  |
| I10 | UIL.21.13285 | Green Peas Luna | 100 | 17 | Food | 367.10 | 86.50 | 0.42 | 0.42 |  | 0.12 | 0.12 |  | 0.61 | 0.61 |  | 0.60 | 0.60 |  |
| H36 | UIL.21.14555 | La Ming Beans In Tomato Sauce | 100 | 17 | Food | 1667.92 | 392.74 | 0.98 | 0.98 |  | 0.23 | 0.23 |  | 2.40 | 2.40 |  | 0.00 | 0.00 |  |
| H26 | UIL.21.14556 | Luna Baked Beans In Tomato Sauce | 100 | 17 | Food | 376.77 | 88.74 | 0.30 | 0.30 |  | 0.19 | 0.19 |  | 3.96 | 3.96 |  | 0.81 | 0.81 |  |
| H27 | UIL.21.14558 | Lunafoul Medames Extra Grade Fava Beans | 100 | 17 | Food | 422.83 | 99.61 | 0.41 | 0.41 |  | 0.21 | 0.21 |  | 1.17 | 1.17 |  | 0.84 | 0.84 |  |
| J9 | UIL.21.14406 | Mango Pickle / Aeroplane | 100 | 17 | Food | 339.32 | 81.04 | 4.08 | 4.08 |  | 1.23 | 1.23 |  | 0.10 | 0.10 |  | 12.80 | 12.80 |  |

| **Sr.No** | **Sample ID (from lab)** | **Name of Product & Brand** | **Portion (g/ml)** | **Nutrient Profile Group** | **Food Item** | **Energy (kJ  per 100g)** | **Energy (kcal  per 100g)** | **Fat (g  per 100g)** | **Fat  (g per serving)** | **FINAL  FAT** | **SFA1 (g  per 100g)** | **SFA1 (g per serving)** | **FINAL  SFA1** | **Sugars (g  per 100g)** | **Sugars (g  per serving)** | **FINAL  Sugars** | **Salt (g per 100g)** | **Salt (g per serving)** | **FINAL  Salt** |
| --- | --- | --- | --- | --- | --- | --- | --- | --- | --- | --- | --- | --- | --- | --- | --- | --- | --- | --- | --- |
| J6 | UIL.21.14403 | Mango Pickles In Oil / Ahmed | 20 | 17 | Food | 980.40 | 236.80 | 20.80 | 4.16 |  | 2.30 | 0.46 |  | 0.50 | 0.10 |  | 7.66 | 1.53 |  |
| J8 | UIL.21.14405 | Mango Thokku Pickle In Oil / Priya | 100 | 17 | Food | 701.64 | 166.33 | 4.21 | 4.21 |  | 1.03 | 1.03 |  | 22.40 | 22.40 |  | 11.36 | 11.36 |  |
| J77 | UIL.21.14559 | Peas processed | 130 | 17 | Food | 360.42 | 84.81 | 0.01 | 0.01 |  | 0.00 | 0.00 |  | 2.46 | 3.20 |  | 0.55 | 0.71 |  |
| I2 | UIL.21.13277 | Plain Medammes California Garden | 130 | 17 | Food | 400.31 | 94.19 | 0.01 | 0.01 |  | 0.00 | 0.00 |  | 0.93 | 1.21 |  | 0.87 | 1.13 |  |
| I12 | UIL.21.13287 | Processed Peas Almazraa | 130 | 17 | Food | 338.58 | 79.67 | 0.01 | 0.01 |  | 0.00 | 0.00 |  | 1.64 | 2.13 |  | 0.83 | 1.07 |  |
| I4 | UIL.21.13279 | Processed Peas California Garden | 130 | 17 | Food | 356.63 | 83.92 | 0.01 | 0.01 |  | 0.15 | 0.20 |  | 1.64 | 2.13 |  | 0.84 | 1.09 |  |
| I15 | UIL.21.13290 | Sweet Corn American Garden | 125 | 17 | Food | 383.17 | 90.54 | 1.29 | 1.61 |  | 0.29 | 0.36 |  | 6.41 | 8.01 |  | 0.45 | 0.57 |  |
| I5 | UIL.21.13280 | Sweet Corn California Garden | 130 | 17 | Food | 416.07 | 98.22 | 1.08 | 1.40 |  | 0.28 | 0.36 |  | 3.08 | 4.01 |  | 0.34 | 0.44 |  |
| I13 | UIL.21.13288 | Sweet Corn Libbys | 125 | 17 | Food | 212.05 | 50.06 | 0.55 | 0.69 |  | 0.16 | 0.20 |  | 2.09 | 2.61 |  | 0.57 | 0.71 |  |
| J7 | UIL.21.14404 | Tomato Paste / Alalali | 100 | 17 | Food | 345.39 | 81.48 | 0.72 | 0.72 |  | 0.38 | 0.38 |  | 12.30 | 12.30 |  | 1.04 | 1.04 |  |
| J 2 | UIL.21.14399 | Tomato Paste / Almudhish | 100 | 17 | Food | 411.57 | 97.14 | 1.02 | 1.02 |  | 0.39 | 0.39 |  | 10.40 | 10.40 |  | 0.00 | 0.00 |  |
| J 3 | UIL.21.14400 | Tomato Paste / Jumbo | 100 | 17 | Food | 361.50 | 85.25 | 0.65 | 0.65 |  | 0.25 | 0.25 |  | 4.14 | 4.14 |  | 0.77 | 0.77 |  |
| A13 | UIL.21.14394 | American Garden BBQ Sauce Original | 36 | 18 | Food | 709.36 | 166.92 | 0.03 | 0.01 |  | 0.01 | 0.00 |  | 34.14 | 12.29 |  | 2.51 | 0.90 |  |
| 18 J | UIL.21.14415 | Classic Mayonnaise / Mazola | 14 | 18 | Food | 2992.86 | 727.50 | 79.21 | 11.09 |  | 13.64 | 1.91 |  | 3.71 | 0.52 |  | 1.27 | 0.18 |  |
| 19 j | UIL.21.14416 | Creamy Classic Mayonnaise / Heinz | 10 | 18 | Food | 1534.02 | 371.49 | 35.85 | 3.59 |  | 7.32 | 0.73 |  | 3.46 | 0.35 |  | 2.05 | 0.21 |  |
| A12 | UIL.21.14393 | Delicio 1000 Island | 14 | 18 | Food | 1544.86 | 374.36 | 36.93 | 5.17 |  | 6.64 | 0.93 |  | 14.29 | 2.00 |  | 2.64 | 0.37 |  |
| A11 | UIL.21.14392 | Delicio French Dressing | 14 | 18 | Food | 1645.43 | 398.00 | 36.86 | 5.16 |  | 6.64 | 0.93 |  | 19.79 | 2.77 |  | 2.84 | 0.40 |  |
| FA1 | UIL.21.13296 | Hayat Hot Sauce | 100 | 18 | Food | 49.70 | 11.90 | 0.70 | 0.70 |  | 0.00 | 0.00 |  | 0.72 | 0.72 |  | 6.64 | 6.64 |  |
| A14 | UIL.21.14395 | Heinz Classic BBQ Smokey And Rich | 100 | 18 | Food | 601.49 | 141.63 | 0.35 | 0.35 |  | 0.15 | 0.15 |  | 28.68 | 28.68 |  | 1.26 | 1.26 |  |
| J 5 | UIL.21.14402 | Hot Sauce / Excellence | 100 | 18 | Food | 186.52 | 43.89 | 0.01 | 0.01 |  | 0.00 | 0.00 |  | 9.79 | 9.79 |  | 5.82 | 5.82 |  |
| 20 J | UIL.21.14417 | Hot Sause / American Garden | 5 | 18 | Food | 51.60 | 12.20 | 0.20 | 0.01 |  | 0.04 | 0.00 |  | 2.00 | 0.10 |  | 7.09 | 0.35 |  |
| FA2 | UIL.21.13297 | Jumbo Hot Sauce | 100 | 18 | Food | 24.10 | 5.70 | 0.10 | 0.10 |  | 0.00 | 0.00 |  | 0.58 | 0.58 |  | 4.09 | 4.09 |  |
| A 33 | UIL.21.14563 | Knour Beef Flavoured Stock | 250 | 18 | Food | 12.41 | 2.92 | 0.00 | 0.00 |  | 0.00 | 0.00 |  | 0.00 | 0.00 |  | 1.12 | 2.81 |  |
| H34 | UIL.21.14562 | Knour CHICKEN Stock | 250 | 18 | Food | 13.09 | 3.08 | 0.00 | 0.00 |  | 0.00 | 0.00 |  | 0.00 | 0.00 |  | 1.17 | 2.93 |  |
| H35 | UIL.21.14561 | Knour Vegetable Stock Cubes | 250 | 18 | Food | 11.56 | 2.72 | 0.00 | 0.00 |  | 0.00 | 0.00 |  | 0.00 | 0.00 |  | 1.37 | 3.42 |  |
| H33 | UIL.21.14564 | Maggi Beef Flavour | 100 | 18 | Food | 219.98 | 51.76 | 0.00 | 0.00 |  | 0.00 | 0.00 |  | 0.00 | 0.00 |  | 50.55 | 50.55 |  |
| FA7 | UIL.21.13430 | Maggi Chicken Stock | 100 | 18 | Food | 1144.32 | 275.69 | 21.89 | 21.89 |  | 12.87 | 12.87 |  | 8.23 | 8.23 |  | 46.28 | 46.28 |  |
| A32 | UIL.21.14565 | Maggi Chicken Stock Less Salt | 100 | 18 | Food | 494.70 | 116.40 | 0.00 | 0.00 |  | 0.00 | 0.00 |  | 0.00 | 0.00 |  | 37.54 | 37.54 |  |
| J10 | UIL.21.14407 | Pizza Sauce Olive& Mushrooms / Alalali | 100 | 18 | Food | 257.36 | 61.02 | 1.58 | 1.58 |  | 0.36 | 0.36 |  | 6.38 | 6.38 |  | 0.91 | 0.91 |  |
| J 1 | UIL.21.14398 | Soy Sauce Classic / American Garden | 5 | 18 | Food | 51.60 | 12.20 | 0.20 | 0.01 |  | 0.04 | 0.00 |  | 2.00 | 0.10 |  | 7.25 | 0.36 |  |
| J4 | UIL.21.14401 | Tabasco Hot Sauce | 100 | 18 | Food | 75.68 | 17.81 | 0.01 | 0.01 |  | 0.00 | 0.00 |  | 2.65 | 2.65 |  | 1.75 | 1.75 |  |
| J11 | UIL.21.14408 | Tomato Ketchup / Hayat | 15 | 18 | Food | 464.87 | 109.40 | 0.07 | 0.01 |  | 0.01 | 0.00 |  | 22.20 | 3.33 |  | 2.07 | 0.31 |  |
| 16 J | UIL.21.14413 | Tomato Ketchup / Heinz | 100 | 18 | Food | 420.27 | 98.89 | 0.01 | 0.01 |  | 0.00 | 0.00 |  | 22.58 | 22.58 |  | 1.83 | 1.83 |  |
| 14 J | UIL.21.14411 | Tomato Ketchup/ Jumbo | 100 | 18 | Food | 527.25 | 124.15 | 0.31 | 0.31 |  | 0.19 | 0.19 |  | 26.94 | 26.94 |  | 0.42 | 0.42 |  |
| A25 | UIL.21.14133 | Al Deyafa Fruit Cordial | 100 | 3a | Drink | 184.07 | 43.34 | 0.10 | 0.10 |  | 0.02 | 0.02 |  | 9.15 | 9.15 |  | 0.00 | 0.00 |  |
| A22 | UIL.21.13828 | Al Deyafa Orange Flavour (Powder) | 100 | 3a | Drink | 1093.61 | 257.32 | 0.00 | 0.00 |  | 0.00 | 0.00 |  | 60.59 | 60.59 |  | 0.04 | 0.04 |  |
| A20 | UIL.21.13850 | Al Marai Mango Juice | 100 | 3a | Food | 1627.58 | 382.96 | 0.00 | 0.00 |  | 0.00 | 0.00 |  | 94.69 | 94.69 |  | 0.00 | 0.00 |  |
| A26 | UIL.21.14134 | Al Rabie Fruit Cocktail Nectar | 100 | 3a | Drink | 271.96 | 64.02 | 0.10 | 0.10 |  | 0.00 | 0.00 |  | 11.81 | 11.81 |  | 0.00 | 0.00 |  |
| A27 | UIL.21.14132 | Al Rawabi Apple Juice | 100 | 3a | Drink | 263.33 | 61.96 | 0.00 | 0.00 |  | 0.00 | 0.00 |  | 12.47 | 12.47 |  | 0.00 | 0.00 |  |
| FA44 | UIL.21.14138 | Al Rawabi Red Grape Juice | 100 | 3a | Drink | 266.01 | 62.62 | 0.10 | 0.10 |  | 0.00 | 0.00 |  | 13.96 | 13.96 |  | 0.00 | 0.00 |  |
| A28 | UIL.21.14135 | Almarai Graps And Berries (Farms Select ) | 200 | 3a | Drink | 245.63 | 57.81 | 0.05 | 0.10 |  | 0.00 | 0.00 |  | 13.61 | 27.22 |  | 0.00 | 0.00 |  |

| **Sr.No** | **Sample ID (from lab)** | **Name of Product & Brand** | **Portion (g/ml)** | **Nutrient Profile Group** | **Food Item** | **Energy (kJ  per 100g)** | **Energy (kcal  per 100g)** | **Fat (g  per 100g)** | **Fat  (g per serving)** | **FINAL  FAT** | **SFA1 (g  per 100g)** | **SFA1 (g per serving)** | **FINAL  SFA1** | **Sugars (g  per 100g)** | **Sugars (g  per serving)** | **FINAL  Sugars** | **Salt (g per 100g)** | **Salt (g per serving)** | **FINAL  Salt** |
| --- | --- | --- | --- | --- | --- | --- | --- | --- | --- | --- | --- | --- | --- | --- | --- | --- | --- | --- | --- |
| H23 | UIL.21.13822 | Almarai Orange Juice 100% 300 ml | 300 | 3a | Drink | 203.77 | 47.95 | 0.00 | 0.00 |  | 0.00 | 0.00 |  | 9.39 | 28.16 |  | 0.00 | 0.00 |  |
| H21 | UIL.21.13823 | Alrawabi Orange 1005juice | 100 | 3a | Drink | 187.00 | 44.00 | 0.00 | 0.00 |  | 0.00 | 0.00 |  | 6.65 | 6.65 |  | 0.15 | 0.15 |  |
| H25 | UIL.21.13821 | Asafwa Natural Orange 200 ml | 100 | 3a | Drink | 219.98 | 51.76 | 0.00 | 0.00 |  | 0.00 | 0.00 |  | 10.25 | 10.25 |  | 0.42 | 0.42 |  |
| FA45 | UIL.21.14139 | A'safwah Mixed Fruit Juice | 100 | 3a | Drink | 244.25 | 57.50 | 0.10 | 0.10 |  | 0.00 | 0.00 |  | 11.56 | 11.56 |  | 0.00 | 0.00 |  |
| J69 | UIL.21.14143 | Fruit Drink (Orange) , Rani | 100 | 3a | Drink | 229.63 | 54.06 | 0.10 | 0.10 |  | 0.00 | 0.00 |  | 11.56 | 11.56 |  | 0.02 | 0.02 |  |
| J71 | UIL.21.14142 | Fruit Nectar (Lacnor) | 100 | 3a | Drink | 229.63 | 54.06 | 0.10 | 0.10 |  | 0.00 | 0.00 |  | 12.73 | 12.73 |  | 0.00 | 0.00 |  |
| H19 | UIL.21.13829 | Mango Juice Mazoon 200ml | 100 | 3a | Drink | 279.48 | 65.76 | 0.00 | 0.00 |  | 0.00 | 0.00 |  | 13.44 | 13.44 |  | 0.00 | 0.00 |  |
| J49 | UIL.21.13824 | Mixed Fruit Juice (Mazoon) | 100 | 3a | Drink | 225.08 | 52.96 | 0.00 | 0.00 |  | 0.00 | 0.00 |  | 11.77 | 11.77 |  | 0.00 | 0.00 |  |
| A30 | UIL.21.14136 | Nada Mango Juice | 200 | 3a | Drink | 221.87 | 52.21 | 0.01 | 0.01 |  | 0.00 | 0.00 |  | 10.50 | 21.00 |  | 0.00 | 0.00 |  |
| A29 | UIL.21.14137 | Nada Orange Juice | 200 | 3a | Drink | 188.34 | 44.33 | 0.05 | 0.10 |  | 0.00 | 0.00 |  | 10.46 | 20.92 |  | 0.00 | 0.00 |  |
| H20 | UIL.21.13827 | Natural Mango Asafwa 200ml | 100 | 3a | Drink | 233.58 | 54.96 | 0.00 | 0.00 |  | 0.00 | 0.00 |  | 13.13 | 13.13 |  | 0.01 | 0.01 |  |
| J70 | UIL.21.14141 | Orange Drink (Top Fruit) | 100 | 3a | Drink | 207.87 | 48.94 | 0.10 | 0.10 |  | 0.00 | 0.00 |  | 10.72 | 10.72 |  | 0.01 | 0.01 |  |
| SI2 | UIL.21.13826 | Orange No Add Sugar (Top Fruit) | 100 | 3a | Drink | 177.65 | 41.80 | 0.00 | 0.00 |  | 0.00 | 0.00 |  | 9.14 | 9.14 |  | 0.02 | 0.02 |  |
| H28 | UIL.21.14140 | Sun Top Orange Fruit Drink | 100 | 3a | Drink | 225.04 | 52.98 | 0.10 | 0.10 |  | 0.00 | 0.00 |  | 11.84 | 11.84 |  | 0.01 | 0.01 |  |
| J24 | UIL.21.17402 | Tang (Orange) (Powder) | 25 | 3a | Food | 1648.32 | 387.84 | 0.00 | 0.00 |  | 0.00 | 0.00 |  | 96.92 | 24.23 |  | 0.46 | 0.11 |  |
| H22 | UIL.21.13825 | Top fruit Fruit Cocktail 200ml | 100 | 3a | Drink | 193.46 | 45.52 | 0.00 | 0.00 |  | 0.00 | 0.00 |  | 9.28 | 9.28 |  | 0.06 | 0.06 |  |
| A21 | UIL.21.13851 | Vimto | 100 | 3a | Drink | 213.86 | 50.32 | 0.00 | 0.00 |  | 0.00 | 0.00 |  | 12.39 | 12.39 |  | 0.00 | 0.00 |  |
| J62 | UIL.21.14129 | Evaporated Milk (Rainbow) | 100 | 3c | Drink | 608.12 | 145.69 | 8.85 | 8.85 |  | 6.25 | 6.25 |  | 9.54 | 9.54 |  | 0.27 | 0.27 |  |
| H6 | UIL.21.13450 | Galaxy Smooth Milk | 36 | 3c | Drink | 1648.85 | 388.08 | 0.38 | 0.14 |  | 0.08 | 0.03 |  | 73.08 | 26.31 |  | 0.00 | 0.00 |  |
| FA39 | UIL.21.13551 | Mazoon Fresh Milk Strawberry Flavour | 100 | 3c | Drink | 353.71 | 84.17 | 3.21 | 3.21 |  | 2.36 | 2.36 |  | 6.47 | 6.47 |  | 0.14 | 0.14 |  |
| J60 | UIL.21.14570 | Milk Powder (Almudhish) | 100 | 3c | Food | 2201.83 | 526.76 | 29.52 | 29.52 |  | 19.24 | 19.24 |  | 38.95 | 38.95 |  | 0.71 | 0.71 |  |
| J61 | UIL.21.14569 | Milk Powder (Majan) | 100 | 3c | Food | 2187.30 | 523.25 | 29.21 | 29.21 |  | 20.19 | 20.19 |  | 47.83 | 47.83 |  | 0.84 | 0.84 |  |
| J31 | UIL.21.13553 | Strawberry flavored milk | 250 | 3c | Drink | 350.50 | 83.21 | 2.50 | 6.26 |  | 1.74 | 4.35 |  | 12.03 | 30.07 |  | 0.15 | 0.37 |  |
| J73 | UIL.21.14171 | Strawberry Flavored Milk (Lacnor) | 100 | 3c | Drink | 354.88 | 84.46 | 3.26 | 3.26 |  | 1.94 | 1.94 |  | 9.84 | 9.84 |  | 0.18 | 0.18 |  |
| J72 | UIL.21.14170 | Strawberry Fresh Milk (Alrawabi) | 100 | 3c | Drink | 354.39 | 84.33 | 3.21 | 3.21 |  | 2.27 | 2.27 |  | 9.67 | 9.67 |  | 0.12 | 0.12 |  |
| J29 | UIL.21.13552 | Strawberry Milk (Nada) | 100 | 3c | Drink | 388.23 | 92.06 | 2.42 | 2.42 |  | 1.78 | 1.78 |  | 14.14 | 14.14 |  | 0.15 | 0.15 |  |
| J30 | UIL.21.13554 | Strwaberry Milk (Asafwah) | 100 | 3c | Drink | 385.01 | 91.56 | 3.28 | 3.28 |  | 2.32 | 2.32 |  | 11.77 | 11.77 |  | 0.38 | 0.38 |  |
| J63 | UIL.21.14130 | Tea Milk (Almudhish) | 100 | 3c | Drink | 571.59 | 136.88 | 8.12 | 8.12 |  | 4.05 | 4.05 |  | 9.28 | 9.28 |  | 0.27 | 0.27 |  |
| J34 | UIL.21.14173 | Energy drink (Red bull) | 100 | 3d | Drink | 197.40 | 46.45 | 0.01 | 0.01 |  | 0.00 | 0.00 |  | 10.15 | 10.15 |  | 0.11 | 0.11 |  |
| A24 | UIL.21.13849 | Power Horse Energy | 250 | 3d | Drink | 201.55 | 47.42 | 0.00 | 0.00 |  | 0.00 | 0.00 |  | 11.28 | 28.20 |  | 0.17 | 0.42 |  |
| J38 | UIL.21.14174 | Coca cola | 100 | 3e | Drink | 186.69 | 43.93 | 0.01 | 0.01 |  | 0.00 | 0.00 |  | 9.78 | 9.78 |  | 0.04 | 0.04 |  |
| A31 | UIL.21.14172 | Lipton Peach Ice tea | 100 | 3e | Drink | 78.74 | 18.53 | 0.01 | 0.01 |  | 0.00 | 0.00 |  | 4.40 | 4.40 |  | 0.03 | 0.03 |  |
| J32 | UIL.21.14177 | Malt beverage (Barbican) | 100 | 3e | Drink | 55.28 | 13.01 | 0.01 | 0.01 |  | 0.00 | 0.00 |  | 2.22 | 2.22 |  | 0.03 | 0.03 |  |
| J35 | UIL.21.14176 | Mountain Dew | 100 | 3e | Drink | 209.81 | 49.37 | 0.01 | 0.01 |  | 0.00 | 0.00 |  | 11.55 | 11.55 |  | 0.04 | 0.04 |  |
| J36 | UIL.21.14175 | Pepsi | 100 | 3e | Drink | 173.94 | 40.93 | 0.01 | 0.01 |  | 0.00 | 0.00 |  | 9.98 | 9.98 |  | 0.03 | 0.03 |  |
| J33 | UIL.21.14178 | Vitaene Extra (Pokka) | 120 | 3e | Drink | 251.63 | 59.21 | 0.01 | 0.01 |  | 0.00 | 0.00 |  | 13.36 | 16.03 |  | 0.00 | 0.00 |  |

1: SFA = Saturated Fatty Acids. Red colour: means the food contains high amounts of this nutrient. Amber colour: means the food is neither high nor low in this nutrient. Green colour: means the food is low in this nutrient.

**Table 6**: Percentage reference intake (% RI) and Scores of IR information

| **Sr.No** | **Sample ID  (from lab)** | **Name of Product & Brand** | **Percentage reference intake (% RI) information** | | | | | | | | **Score of Percentage reference intake (% RI) Information** | | | | | | | |
| --- | --- | --- | --- | --- | --- | --- | --- | --- | --- | --- | --- | --- | --- | --- | --- | --- | --- | --- |
| **%RI1 Energy (kJ)** | **%RI Energy (kcal)** | **%RI  Fat** | **%RI SFA2** | **%RI Carbohy-drates** | **%RI  Sugars** | **%RI Protein** | **%RI  Salt** | **Score %RI3  Energy  (kJ)** | **Score %RI  Energy (kcal)** | **Score %RI  Fat** | **Score %RI  Saturates** | **Score %RI  Carbohydrates** | **Score %RI  Sugars** | **Score %RI  Protein** | **Score %RI  Salt** |
| 17 J | UIL.21.14414 | Natural Honey / Alshifa | 16.93 | 16.73 | 0.00 | 0.00 | 32.17 | 89.22 | 0.00 | 0.00 | Good | Good | Low | Low | High | High | Low | Low |
| 15 J | UIL.21.14412 | Pure honey / Capilano | 16.58 | 16.39 | 0.00 | 0.00 | 31.52 | 90.00 | 0.00 | 0.00 | Good | Good | Low | Low | High | High | Low | Low |
| FA19 | UIL.21.13442 | Batook Specialmint Chewing Gum | 18.71 | 18.50 | 0.57 | 0.40 | 34.77 | 2.22 | 2.40 | 0.00 | Good | Good | Low | Low | High | Low | Low | Low |
| FA16 | UIL.21.13439 | Bounty Minis | 21.95 | 21.90 | 20.49 | 41.90 | 26.04 | 16.69 | 19.08 | 13.60 | High | High | High | High | High | Good | Good | Good |
| SI3 | UIL.21.13560 | Cream Caramel Almaraei | 6.24 | 6.20 | 3.19 | 8.30 | 8.75 | 23.24 | 6.46 | 2.55 | Medium | Medium | Low | Medium | Medium | High | Medium | Low |
| 13 J | UIL.21.14410 | Custard Powder / Alalali | 18.37 | 18.16 | 0.01 | 0.01 | 34.90 | 0.11 | 0.02 | 3.44 | Good | Good | Low | Low | High | Low | Low | Low |
| J12 | UIL.21.14409 | Custard Powder/Tiara | 17.97 | 17.76 | 0.33 | 0.70 | 33.83 | 0.23 | 0.64 | 0.01 | Good | Good | Low | Low | High | Low | Low | Low |
| A15 | UIL.21.14396 | Daily Fresh/ Custard Powder | 17.19 | 17.00 | 0.91 | 1.05 | 32.01 | 3.41 | 0.66 | 29.63 | Good | Good | Low | Low | High | Low | Low | High |
| FA49 | UIL.21.13550 | Danet Cream Caramel | 5.79 | 5.75 | 3.16 | 7.95 | 7.84 | 19.78 | 6.82 | 2.65 | Medium | Medium | Low | Medium | Medium | Good | Medium | Low |
| FA18 | UIL.21.13441 | Extra Peppermint | 25.80 | 25.50 | 0.75 | 0.53 | 48.18 | 58.48 | 2.11 | 0.00 | High | High | Low | Low | High | High | Low | Low |
| FA12 | UIL.21.13435 | Kinder Joy | 27.13 | 27.29 | 46.03 | 75.75 | 21.24 | 55.13 | 17.44 | 8.11 | High | High | High | High | High | High | Good | Medium |
| FA14 | UIL.21.13437 | Kitkat | 25.68 | 25.75 | 36.13 | 68.80 | 24.55 | 50.41 | 16.06 | 3.09 | High | High | High | High | High | High | Good | Low |
| FA17 | UIL.21.13440 | Mars Minis | 23.68 | 23.67 | 25.60 | 57.69 | 28.34 | 64.19 | 8.62 | 9.41 | High | High | High | High | High | High | Medium | Medium |
| FA21 | UIL.21.13444 | Mentos Sugar free Chewing Gum | 19.33 | 19.11 | 0.82 | 0.57 | 35.82 | 35.56 | 2.29 | 0.00 | Good | Good | Low | Low | High | High | Low | Low |
| A10 | UIL.21.14391 | Nutella Hazelnut Spread With Cocoa | 27.18 | 27.32 | 44.57 | 52.65 | 23.45 | 64.38 | 10.80 | 1.86 | High | High | High | High | High | High | Medium | Low |
| FA15 | UIL.21.13438 | Snickers Minis | 25.36 | 25.46 | 38.29 | 33.67 | 22.21 | 58.37 | 18.53 | 11.15 | High | High | High | High | High | High | Good | Good |
| H10 | UIL.21.13454 | Twix Minis | 26.10 | 26.17 | 36.21 | 57.25 | 26.52 | 54.00 | 9.70 | 7.87 | High | High | High | High | High | High | Medium | Medium |
| FA20 | UIL.21.13443 | Wrigleys Doublemint Chewing Gum | 18.85 | 18.63 | 0.55 | 0.38 | 35.21 | 90.60 | 1.54 | 0.00 | Good | Good | Low | Low | High | High | Low | Low |
| A3 | UIL.21.14384 | Al Mudhish Puffed Corn Cheese Balls | 28.21 | 28.40 | 51.07 | 82.92 | 21.22 | 4.91 | 12.83 | 26.29 | High | High | High | High | High | Low | Good | High |
| FA10 | UIL.21.13433 | Alrifai (Mixed Nuts) | 26.71 | 26.87 | 46.33 | 23.21 | 15.38 | 7.98 | 42.78 | 10.16 | High | High | High | High | Good | Medium | High | Medium |
| FA8 | UIL.21.13431 | American Garden Popcorn Butter | 23.48 | 23.56 | 34.89 | 54.55 | 21.21 | 0.34 | 15.39 | 41.70 | High | High | High | High | High | Low | Good | High |
| FA9 | UIL.21.13432 | Best Salted Mixed Nuts | 31.78 | 32.17 | 74.13 | 41.55 | 7.52 | 4.76 | 49.04 | 14.23 | High | High | High | High | Medium | Low | High | Good |
| J25 | UIL.21.17408 | Cheese Balls (Pofak Oman) | 29.02 | 29.18 | 49.05 | 38.33 | 23.79 | 8.30 | 13.60 | 65.26 | High | High | High | High | High | Medium | Good | High |
| J53 | UIL.21.14418 | Cheese pastry (Dhahabi) | 28.75 | 28.99 | 55.93 | 83.95 | 18.07 | 4.63 | 19.78 | 24.94 | High | High | High | High | Good | Low | Good | High |
| J65 | UIL.21.14551 | Cheetos / Flamin Hot | 18.88 | 18.93 | 26.49 | 23.70 | 15.90 | 4.28 | 23.14 | 12.99 | Good | Good | High | High | Good | Low | High | Good |
| A1 | UIL.21.13463 | Cheez Balls (Mr. Krispy) | 28.51 | 28.69 | 49.48 | 48.67 | 22.91 | 1.19 | 11.87 | 29.66 | High | High | High | High | High | Low | Good | High |
| A5 | UIL.21.14386 | chips Oman | 28.04 | 28.28 | 55.39 | 84.45 | 18.32 | 0.00 | 13.08 | 21.30 | High | High | High | High | Good | Low | Good | High |
| A2 | UIL.21.14383 | Lay's (Salt) | 28.03 | 28.22 | 50.71 | 80.36 | 20.66 | 0.00 | 15.00 | 25.16 | High | High | High | High | High | Low | Good | High |
| A9 | UIL.21.14390 | Mani (Mixed Nuts ) | 30.83 | 31.19 | 70.47 | 39.60 | 7.29 | 9.50 | 52.02 | 13.39 | High | High | High | High | Medium | Medium | High | Good |
| H14 | UIL.21.13458 | Nabil Cracker Salted Biscuits | 23.76 | 23.76 | 27.51 | 67.50 | 25.35 | 22.27 | 19.16 | 42.27 | High | High | High | High | High | High | Good | High |
| **Sr.No** | **Sample ID (from lab)** | **Name of Product & Brand** | **Percentage reference intake (% RI) information** | | | | | | | | **Score of Percentage reference intake (% RI) Information** | | | | | | | |
| **%RI1 Energy (kJ)** | **%RI Energy (kcal)** | **%RI  Fat** | **%RI SFA2** | **%RI Carbohy-drates** | **%RI  Sugars** | **%RI Protein** | **%RI  Salt** | **Score %RI3  Energy  (kJ)** | **Score %RI  Energy (kcal)** | **Score %RI  Fat** | **Score %RI  Saturates** | **Score %RI  Carbohydrates** | **Score %RI  Sugars** | **Score %RI  Protein** | **Score %RI  Salt** |
| A8 | UIL.21.14389 | Popcorn Cheese / American Garden | 26.22 | 26.41 | 48.87 | 78.33 | 18.66 | 0.00 | 13.15 | 41.86 | High | High | High | High | Good | Low | Good | High |
| A4 | UIL.21.14385 | potato chips ready salted | 27.90 | 28.10 | 51.58 | 78.75 | 20.05 | 0.00 | 14.21 | 22.68 | High | High | High | High | High | Low | Good | High |
| H18 | UIL.21.13462 | Pringles Original | 27.42 | 27.59 | 47.84 | 17.65 | 22.33 | 1.17 | 9.06 | 19.16 | High | High | High | Good | High | Low | Medium | Good |
| A7 | UIL.21.14388 | Shai ( Mix Nut) | 30.63 | 30.98 | 69.20 | 34.35 | 7.96 | 7.61 | 50.42 | 6.38 | High | High | High | High | Medium | Medium | High | Medium |
| J74 | UIL.21.14560 | Sohar Chips | 27.20 | 27.36 | 46.23 | 71.55 | 23.39 | 0.00 | 6.36 | 40.25 | High | High | High | High | High | Low | Medium | High |
| J51 | UIL.21.13833 | vanilla ice cream (Igloo) | 9.81 | 9.86 | 15.90 | 33.40 | 7.90 | 20.67 | 7.47 | 2.87 | Medium | Medium | Good | High | Medium | High | Medium | Low |
| J52 | UIL.21.13832 | vanilla ice cream (Mazoon) | 6.78 | 6.81 | 10.94 | 22.30 | 5.28 | 13.74 | 6.18 | 1.93 | Medium | Medium | Medium | High | Medium | Good | Medium | Low |
| FA5 | UIL.21.13300 | KELLOGG'S Coco Pops | 19.34 | 19.15 | 3.54 | 5.75 | 31.01 | 27.20 | 19.08 | 0.01 | Good | Good | Low | Medium | High | High | Good | Low |
| A6 | UIL.21.14387 | Kellogg's special (cereal) | 19.42 | 19.23 | 3.15 | 2.95 | 28.05 | 15.47 | 36.51 | 29.45 | Good | Good | Low | Low | High | Good | High | High |
| FA4 | UIL.21.13299 | NESTLE Chocapic | 20.49 | 20.32 | 6.84 | 7.50 | 31.56 | 27.72 | 17.52 | 4.32 | High | High | Medium | Medium | High | High | Good | Low |
| FA3 | UIL.21.13298 | Nestle Gold Corn Flakes | 19.37 | 19.17 | 2.80 | 1.90 | 32.38 | 11.74 | 14.48 | 18.03 | Good | Good | Low | Low | High | Good | Good | Good |
| A34 | UIL.21.14574 | 7 days mini croissant | 23.45 | 23.59 | 40.78 | 83.64 | 17.03 | 18.69 | 18.91 | 8.59 | High | High | High | High | Good | Good | Good | Medium |
| H16 | UIL.21.13460 | Americana Premium Butter Cookies | 24.45 | 24.46 | 28.96 | 45.80 | 27.12 | 32.67 | 12.34 | 4.76 | High | High | High | High | High | High | Good | Low |
| J57 | UIL.21.14552 | Apple pastry | 18.02 | 18.04 | 22.49 | 41.85 | 18.80 | 18.13 | 11.82 | 0.53 | Good | Good | High | High | Good | Good | Good | Low |
| J56 | UIL.21.17405 | Apple puff (Lusine) | 17.27 | 17.26 | 18.71 | 29.43 | 18.43 | 21.84 | 17.80 | 11.65 | Good | Good | Good | High | Good | High | Good | Good |
| H31 | UIL.21.14566 | Atyab Twin Cake Vanilla | 20.67 | 20.70 | 26.33 | 35.85 | 21.62 | 30.91 | 11.64 | 9.39 | High | High | High | High | High | High | Good | Medium |
| H7 | UIL.21.13451 | Britannia Chocolate Flavoured Premium Crème Wafer | 25.62 | 25.69 | 36.25 | 78.75 | 24.81 | 37.57 | 13.75 | 10.48 | High | High | High | High | High | High | Good | Medium |
| J55 | UIL.21.17406 | Cheese Puff (Lusine) | 19.08 | 19.18 | 31.47 | 51.50 | 13.91 | 9.75 | 20.34 | 26.08 | Good | Good | High | High | Good | Medium | High | High |
| J58 | UIL.21.14568 | Chocolate jumbo croissant | 21.00 | 21.10 | 33.84 | 65.25 | 17.10 | 13.42 | 15.50 | 8.46 | High | High | High | High | Good | Good | Good | Medium |
| J67H32 | UIL.21.17531 | Croissant (Dhahabi) | 21.81 | 21.90 | 33.11 | 51.05 | 19.27 | 13.28 | 14.42 | 26.31 | High | High | High | High | Good | Good | Good | High |
| H17 | UIL.21.13461 | Danish Butter Cookies | 25.45 | 25.53 | 36.34 | 91.70 | 24.95 | 28.93 | 11.04 | 5.32 | High | High | High | High | High | High | Good | Medium |
| J54 | UIL.21.17407 | Donut (Switz) | 20.23 | 20.25 | 25.10 | 27.86 | 21.19 | 21.94 | 13.26 | 10.19 | High | High | High | High | High | High | Good | Medium |
| H13 | UIL.21.13457 | Lotus Biscoff | 24.59 | 24.58 | 27.66 | 67.95 | 28.35 | 40.46 | 11.28 | 17.48 | High | High | High | High | High | High | Good | Good |
| H2 | UIL.21.13446 | Nabil cream wafers (chocolate flavour) | 24.73 | 24.75 | 30.41 | 63.70 | 27.02 | 22.92 | 11.22 | 6.23 | High | High | High | High | High | High | Good | Medium |
| H1 | UIL.21.13445 | Nabil glucose | 23.10 | 23.04 | 20.51 | 37.10 | 28.30 | 16.53 | 18.60 | 0.00 | High | High | High | High | High | Good | Good | Low |
| H3 | UIL.21.13447 | Nabil Nice (sugar sprinkled coconut biscuits) | 23.21 | 23.17 | 21.94 | 35.60 | 27.60 | 23.51 | 19.04 | 15.88 | High | High | High | High | High | High | Good | Good |
| H8 | UIL.21.13452 | Nutro Chocolate Flavoured Cream Wafers | 26.67 | 26.80 | 43.14 | 134.00 | 24.05 | 40.19 | 7.00 | 8.64 | High | High | High | High | High | High | Medium | Medium |
| H15 | UIL.21.13459 | Original Oreo | 24.14 | 24.14 | 27.82 | 43.95 | 27.53 | 46.78 | 10.63 | 24.64 | High | High | High | High | High | High | Medium | High |
| H30 | UIL.21.14567 | Switz Mini Cup Cake Vanilla | 24.23 | 24.38 | 42.01 | 63.75 | 18.69 | 32.22 | 14.25 | 17.11 | High | High | High | High | Good | High | Good | Good |
| H9 | UIL.21.13453 | Tiffany Crunch And Cream | 25.56 | 25.62 | 34.80 | 107.55 | 24.86 | 40.26 | 17.30 | 5.09 | High | High | High | High | High | High | Good | Medium |
| H5 | UIL.21.13449 | Tiffany Everyday Nice (Sugar Sprinkled Coconut Biscuits) | 24.69 | 24.69 | 29.03 | 45.81 | 27.42 | 28.32 | 12.90 | 15.02 | High | High | High | High | High | High | Good | Good |
| **Sr.No** | **Sample ID  (from lab)** | **Name of Product & Brand** | **Percentage reference intake (% RI) information** | | | | | | | | **Score of Percentage reference intake (% RI) Information** | | | | | | | |
| **%RI1 Energy (kJ)** | **%RI Energy (kcal)** | **%RI  Fat** | **%RI SFA2** | **%RI Carbohy-drates** | **%RI  Sugars** | **%RI Protein** | **%RI  Salt** | **Score %RI3  Energy  (kJ)** | **Score %RI  Energy (kcal)** | **Score %RI  Fat** | **Score %RI  Saturates** | **Score %RI  Carbohydrates** | **Score %RI  Sugars** | **Score %RI  Protein** | **Score %RI  Salt** |
| H4 | UIL.21.13448 | Tiffany Glucose (Milk and Honey Biscuits) | 23.98 | 23.96 | 25.48 | 45.81 | 27.79 | 25.45 | 14.84 | 15.09 | High | High | High | High | High | High | Good | Good |
| FA48 | UIL.21.17403 | Activia Full Fat Fresh Laban | 3.03 | 3.05 | 4.69 | 11.30 | 1.79 | 4.96 | 6.40 | 2.21 | Low | Low | Low | Good | Low | Low | Medium | Low |
| FA41 | UIL.21.17409 | Activia Full Fat Plain Yoghurt | 2.23 | 2.24 | 2.97 | 7.63 | 1.44 | 3.69 | 5.53 | 1.48 | Low | Low | Low | Medium | Low | Low | Medium | Low |
| FA32 | UIL.21.13544 | Almarai Fresh Laban Full Fat | 3.10 | 3.12 | 5.21 | 12.86 | 1.67 | 4.54 | 6.14 | 2.34 | Low | Low | Medium | Good | Low | Low | Medium | Low |
| FA34 | UIL.21.13545 | Almarai Laban Up | 1.92 | 1.91 | 1.64 | 4.05 | 1.64 | 4.43 | 5.41 | 13.38 | Low | Low | Low | Low | Low | Low | Medium | Good |
| FA33 | UIL.21.13548 | Almarai Strawberry Laban | 4.43 | 4.40 | 1.95 | 4.54 | 5.92 | 16.99 | 7.04 | 2.37 | Low | Low | Low | Low | Medium | Good | Medium | Low |
| F40 | UIL.21.13546 | Alrawabi Up: Laban Drink | 1.88 | 1.88 | 2.56 | 6.00 | 1.24 | 3.38 | 4.30 | 0.01 | Low | Low | Low | Medium | Low | Low | Low | Low |
| FA42 | UIL.21.17404 | Balade Farms Ayran Original Laban | 1.58 | 1.58 | 1.81 | 5.10 | 1.31 | 0.00 | 3.30 | 15.88 | Low | Low | Low | Medium | Low | Low | Low | Good |
| J64 | UIL.21.14131 | Cream (Luna) | 10.78 | 10.97 | 31.01 | 83.55 | 1.53 | 3.44 | 4.06 | 0.00 | Medium | Medium | High | High | Low | Low | Low | Low |
| J21 | UIL.21.14553 | Cream (Puck) | 11.92 | 12.14 | 35.01 | 58.10 | 1.11 | 0.00 | 5.30 | 0.11 | Good | Good | High | High | Low | Low | Medium | Low |
| J50 | UIL.21.13539 | Fresh Laban (Alrawabi) | 3.04 | 3.05 | 4.67 | 11.45 | 1.78 | 4.41 | 6.56 | 0.00 | Low | Low | Low | Good | Low | Low | Medium | Low |
| F35 | UIL.21.13594 | Fresh Labneh, Full Fat Al-Marai | 7.68 | 7.75 | 15.90 | 39.10 | 2.75 | 7.37 | 13.08 | 9.04 | Medium | Medium | Good | High | Low | Medium | Good | Medium |
| F33 | UIL.21.13592 | Fresh Labneh: Full Fat Mazoon | 8.65 | 8.74 | 18.36 | 44.09 | 3.41 | 8.14 | 11.82 | 9.47 | Medium | Medium | Good | High | Low | Medium | Good | Medium |
| F36 | UIL.21.13558 | Fresh Yougurt Full Fat: Al-Marai | 3.61 | 3.62 | 5.16 | 12.85 | 2.21 | 6.24 | 8.46 | 3.02 | Low | Low | Medium | Good | Low | Medium | Medium | Low |
| F37 | UIL.21.13556 | Fresh Yougurt Full Fat: Al-Safwah | 3.32 | 3.33 | 4.61 | 10.05 | 2.24 | 5.31 | 7.12 | 3.05 | Low | Low | Low | Medium | Low | Medium | Medium | Low |
| J26 | UIL.21.13549 | Laban Drink (Unikai) | 1.64 | 1.63 | 1.06 | 2.40 | 1.27 | 3.36 | 6.38 | 79.40 | Low | Low | Low | Low | Low | Low | Medium | High |
| J75 | UIL.21.14179 | Laban Drinks (Alkhamayil) | 1.50 | 1.49 | 0.83 | 1.85 | 1.62 | 0.99 | 3.88 | 0.00 | Low | Low | Low | Low | Low | Low | Low | Low |
| J28 | UIL.21.13543 | Laban Fresh Full Cream (Asafwah) | 3.16 | 3.17 | 4.73 | 11.85 | 1.96 | 4.52 | 6.62 | 2.90 | Low | Low | Low | Good | Low | Low | Medium | Low |
| J27 | UIL.21.13541 | Laban Up (Alsafwa) | 2.01 | 2.01 | 2.21 | 5.20 | 1.52 | 4.32 | 5.20 | 14.42 | Low | Low | Low | Medium | Low | Low | Medium | Good |
| F34 | UIL.21.13593 | Labneh Turkish Recipe: Puck | 9.36 | 9.46 | 20.30 | 49.10 | 2.66 | 7.14 | 16.82 | 13.19 | Medium | Medium | High | High | Low | Medium | Good | Good |
| FA35 | UIL.21.13542 | Mazoon Fresh Laban Full Fat | 3.22 | 3.23 | 4.71 | 11.10 | 1.78 | 4.98 | 8.18 | 2.18 | Low | Low | Low | Good | Low | Low | Medium | Low |
| FA38 | UIL.21.13555 | Mazoon Fresh Yoghurt Full Fat | 3.40 | 3.40 | 4.59 | 11.45 | 2.45 | 5.60 | 6.82 | 2.47 | Low | Low | Low | Good | Low | Medium | Medium | Low |
| FA37 | UIL.21.13540 | Mazoon Laban Up | 1.53 | 1.52 | 1.27 | 3.00 | 1.42 | 4.11 | 3.84 | 14.62 | Low | Low | Low | Low | Low | Low | Low | Good |
| FA40 | UIL.21.14180 | Mazoon Sambharam Spicy Laban Drink | 1.44 | 1.44 | 1.21 | 2.70 | 1.28 | 1.87 | 3.88 | 15.03 | Low | Low | Low | Low | Low | Low | Low | Good |
| FA36 | UIL.21.13547 | Mazoon Strawberry Laban | 5.11 | 5.10 | 4.99 | 11.50 | 5.53 | 15.86 | 6.56 | 2.30 | Medium | Medium | Low | Good | Medium | Good | Medium | Low |
| A23 | UIL.21.13830 | Nestle cream | 11.94 | 12.15 | 33.49 | 67.00 | 1.88 | 0.00 | 6.18 | 0.00 | Good | Good | High | High | Low | Low | Medium | Low |
| F39 | UIL.21.13557 | Yoghurt: Full Cream Unikai | 3.10 | 3.11 | 4.56 | 12.05 | 1.86 | 4.90 | 7.04 | 3.50 | Low | Low | Low | Good | Low | Low | Medium | Low |
| F38 | UIL.21.13559 | Youghurt;Full Cream AlRawabi | 3.43 | 3.44 | 4.73 | 11.85 | 2.09 | 5.39 | 8.62 | 3.65 | Low | Low | Low | Good | Low | Medium | Medium | Low |
| FA31 | UIL.21.13840 | Almarai Burger Slice Cheese | 15.38 | 15.58 | 36.14 | 75.75 | 2.21 | 0.00 | 30.40 | 58.34 | Good | Good | High | High | Low | Low | High | High |
| FA27 | UIL.21.13845 | Almarai Cream Cheese | 16.94 | 17.24 | 48.71 | 125.67 | 1.64 | 0.00 | 10.40 | 31.54 | Good | Good | High | High | Low | Low | Medium | High |
| FA28 | UIL.21.13844 | Almarai Cream Cheese Cheddar | 16.58 | 16.84 | 44.10 | 77.50 | 1.74 | 0.00 | 20.47 | 48.77 | Good | Good | High | High | Low | Low | High | High |
| J23 | UIL.21.14572 | Chedder cheese (Almarai) | 14.62 | 14.82 | 35.67 | 83.83 | 0.00 | 0.00 | 35.80 | 80.38 | Good | Good | High | High | Low | Low | High | High |
| **Sr.No** | **Sample ID  (from lab)** | **Name of Product & Brand** | **Percentage reference intake (% RI) information** | | | | | | | | **Score of Percentage reference intake (% RI) Information** | | | | | | | |
| **%RI1 Energy (kJ)** | **%RI Energy (kcal)** | **%RI  Fat** | **%RI SFA3** | **%RI Carbohy-drates** | **%RI  Sugars** | **%RI Protein** | **%RI  Salt** | **Score %RI3  Energy  (kJ)** | **Score %RI  Energy (kcal)** | **Score %RI  Fat** | **Score %RI  Saturates** | **Score %RI  Carbohydrates** | **Score %RI  Sugars** | **Score %RI  Protein** | **Score %RI  Salt** |
| J22 | UIL.21.14571 | Chedder cheese (Kraft) | 15.14 | 15.34 | 36.51 | 89.20 | 2.17 | 0.00 | 27.12 | 76.20 | Good | Good | High | High | Low | Low | High | High |
| A19 | UIL.21.13837 | Cheese Triangles Al Maraai | 14.83 | 15.06 | 39.00 | 89.33 | 1.35 | 0.00 | 20.73 | 40.30 | Good | Good | High | High | Low | Low | High | High |
| A18 | UIL.21.13838 | Cheese Triangles Puck | 14.14 | 14.34 | 36.46 | 64.75 | 2.24 | 0.00 | 16.94 | 46.51 | Good | Good | High | High | Low | Low | Good | High |
| F32 | UIL.21.13835 | Haloumi Cheese Al-Marai | 17.12 | 17.30 | 36.96 | 70.60 | 1.52 | 0.00 | 48.64 | 80.28 | Good | Good | High | High | Low | Low | High | High |
| F31 | UIL.21.13834 | Haloumi Pinar | 17.48 | 17.68 | 38.71 | 121.00 | 1.36 | 0.00 | 47.73 | 53.09 | Good | Good | High | High | Low | Low | High | High |
| FA22 | UIL.21.13848 | Kraft Cheddar Cheese Spread Original | 14.97 | 15.20 | 40.30 | 95.60 | 1.62 | 0.00 | 16.68 | 51.46 | Good | Good | High | High | Low | Low | Good | High |
| FA29 | UIL.21.13839 | Kraft Slice Cheese Original | 14.06 | 14.22 | 30.80 | 65.85 | 2.86 | 0.00 | 30.28 | 57.41 | Good | Good | High | High | Low | Low | High | High |
| FA23 | UIL.21.13843 | Mazoon Spread Cheese | 16.73 | 17.03 | 47.83 | 120.60 | 1.18 | 0.00 | 13.44 | 16.76 | Good | Good | High | High | Low | Low | Good | Good |
| FA24 | UIL.21.13842 | Mazoon Spread Cheese Cheddar | 16.68 | 16.98 | 47.89 | 119.10 | 0.91 | 0.00 | 14.24 | 16.73 | Good | Good | High | High | Low | Low | Good | Good |
| H37 | UIL.21.14554 | Pinar Processed Cream Cheese Spread | 15.34 | 15.61 | 44.31 | 139.00 | 0.62 | 0.00 | 13.32 | 30.03 | Good | Good | High | High | Low | Low | Good | High |
| FA25 | UIL.21.13847 | Puck Cream Cheese | 16.28 | 16.56 | 45.50 | 104.85 | 0.96 | 0.00 | 17.30 | 35.40 | Good | Good | High | High | Low | Low | Good | High |
| FA26 | UIL.21.13846 | Puck Cream Cheese Cheddar | 16.35 | 16.63 | 45.73 | 96.00 | 1.01 | 0.00 | 17.04 | 33.68 | Good | Good | High | High | Low | Low | Good | High |
| FA30 | UIL.21.13841 | Puck Slice Cheese Original | 16.33 | 16.55 | 39.51 | 70.20 | 2.18 | 0.00 | 29.62 | 25.76 | Good | Good | High | High | Low | Low | High | High |
| A17 | UIL.21.13836 | Triangle Cheese Abu Alwald | 12.56 | 12.73 | 30.03 | 59.60 | 3.12 | 0.00 | 16.44 | 31.55 | Good | Good | High | High | Low | Low | Good | High |
| H12 | UIL.21.13456 | Britannia Toastea Wheat Rusk | 21.92 | 21.80 | 13.92 | 21.77 | 29.80 | 29.67 | 19.23 | 9.45 | High | High | Good | High | High | High | Good | Medium |
| H11 | UIL.21.13455 | Tiffany Whole Wheat Rusks | 21.36 | 21.23 | 12.13 | 19.00 | 29.59 | 25.68 | 20.26 | 9.53 | High | High | Good | Good | High | High | High | Medium |
| FA6 | UIL.21.13429 | Indomie Fried Noodles | 23.50 | 23.53 | 29.89 | 56.75 | 23.87 | 9.16 | 17.08 | 57.76 | High | High | High | High | High | Medium | Good | High |
| F25 | UIL.21.14202 | Al-Islami Ground Beef | 6.92 | 6.98 | 13.21 | 20.80 | 0.90 | 1.53 | 23.48 | 17.80 | Medium | Medium | Good | High | Low | Low | High | Good |
| F24 | UIL.21.14203 | Al-Kabeer Jumbo Hot Dogs | 7.71 | 7.73 | 10.99 | 21.55 | 1.63 | 0.00 | 34.24 | 22.84 | Medium | Medium | Medium | High | Low | Low | High | High |
| F30 | UIL.21.14194 | Al-Safa Breaded Chicken Finger | 11.45 | 11.44 | 11.87 | 12.80 | 7.57 | 0.00 | 37.60 | 20.56 | Good | Good | Good | Good | Medium | Low | High | High |
| F29 | UIL.21.14196 | Al-Safa Chicken Burger | 8.79 | 8.84 | 14.87 | 15.05 | 1.52 | 0.00 | 33.72 | 16.73 | Medium | Medium | Good | Good | Low | Low | High | Good |
| F26 | UIL.21.14205 | Al-Safa Chicken Franks | 10.23 | 10.33 | 21.26 | 40.29 | 2.25 | 0.00 | 24.59 | 55.08 | Medium | Medium | High | High | Low | Low | High | High |
| F28 | UIL.21.14204 | Americana Beef Hot dog | 9.01 | 9.08 | 17.94 | 26.35 | 0.81 | 0.00 | 30.10 | 25.54 | Medium | Medium | Good | High | Low | Low | High | High |
| J48 | UIL.21.14200 | Beef Burger (Taybat) | 11.12 | 11.19 | 19.31 | 34.95 | 2.46 | 0.00 | 38.22 | 26.27 | Good | Good | Good | High | Low | Low | High | High |
| F23 | UIL.21.14199 | Beef Burger Sadia | 13.29 | 13.44 | 29.39 | 51.60 | 2.58 | 0.00 | 28.42 | 19.29 | Good | Good | High | High | Low | Low | High | Good |
| SI1 | UIL.21.14201 | Corned Beef (Taybat) | 8.83 | 8.85 | 12.03 | 20.70 | 4.92 | 0.60 | 25.00 | 8.94 | Medium | Medium | Good | High | Low | Low | High | Medium |
| H29 | UIL.21.14573 | Family Corned Beef | 10.73 | 10.76 | 15.13 | 32.70 | 1.96 | 4.47 | 49.74 | 18.02 | Medium | Medium | Good | High | Low | Low | High | Good |
| F22 | UIL.21.14198 | Sadia Chicken Burger | 10.96 | 11.06 | 21.77 | 29.65 | 2.61 | 0.00 | 28.42 | 25.19 | Medium | Medium | High | High | Low | Low | High | High |
| F27 | UIL.21.14206 | Sadia Chicken Franks | 10.06 | 10.17 | 22.36 | 33.85 | 1.04 | 0.00 | 25.88 | 19.53 | Medium | Medium | High | High | Low | Low | High | Good |
| F21 | UIL.21.14195 | Sadia Chicken Nuggets Crispy | 11.19 | 11.21 | 14.79 | 16.05 | 8.03 | 0.00 | 23.78 | 17.60 | Good | Good | Good | Good | Medium | Low | High | Good |
| I20 | UIL.21.13295 | Light Chunks Tuna California Garden In Water | 5.46 | 5.41 | 1.53 | 4.00 | 0.37 | 0.93 | 47.38 | 9.11 | Medium | Medium | Low | Low | Low | Low | High | Medium |
| **Sr.No** | **Sample ID (from lab)** | **Name of Product & Brand** | **Percentage reference intake (% RI) information** | | | | | | | | **Score of Percentage reference intake (% RI) Information** | | | | | | | |
| **%RI1 Energy (kJ)** | **%RI Energy (kcal)** | **%RI  Fat** | **%RI SFA3** | **%RI Carbohy-drates** | **%RI  Sugars** | **%RI Protein** | **%RI  Salt** | **Score %RI3  Energy  (kJ)** | **Score %RI  Energy (kcal)** | **Score %RI  Fat** | **Score %RI  Saturates** | **Score %RI  Carbohydrates** | **Score %RI  Sugars** | **Score %RI  Protein** | **Score %RI  Salt** |
| I16 | UIL.21.13291 | Skipjack Tuna Alalali In Sun Flower Oil | 10.33 | 10.38 | 15.74 | 7.30 | 1.52 | 0.89 | 46.24 | 20.33 | Medium | Medium | Good | Medium | Low | Low | High | High |
| I19 | UIL.21.13294 | Skipjack Tuna California Garden In Sun Flower Oil | 6.79 | 6.75 | 4.26 | 1.80 | 0.77 | 0.99 | 50.12 | 12.84 | Medium | Medium | Low | Low | Low | Low | High | Good |
| I17 | UIL.21.13292 | Tuna Alalali In Water | 5.36 | 5.30 | 0.01 | 0.01 | 1.27 | 0.99 | 46.38 | 20.30 | Medium | Medium | Low | Low | Low | Low | High | High |
| FA11 | UIL.21.13434 | White Tuna Meat In Brine | 5.84 | 5.78 | 0.87 | 2.30 | 0.76 | 0.11 | 51.14 | 16.12 | Medium | Medium | Low | Low | Low | Low | High | Good |
| I18 | UIL.21.13293 | White Tuna Meat In Sun Flower Oil Delmonte | 8.07 | 8.05 | 7.97 | 4.00 | 1.14 | 0.40 | 49.50 | 18.00 | Medium | Medium | Medium | Low | Low | Low | High | Good |
| I14 | UIL.21.13289 | Baked Beans Almazraa | 3.71 | 3.69 | 1.87 | 1.30 | 4.37 | 0.82 | 8.22 | 6.50 | Low | Low | Low | Low | Low | Low | Medium | Medium |
| I7 | UIL.21.13282 | Baked Beans California Garden | 6.42 | 6.36 | 0.90 | 0.81 | 9.99 | 6.80 | 8.80 | 16.61 | Medium | Medium | Low | Low | Medium | Medium | Medium | Good |
| I3 | UIL.21.13278 | Boildchick Peas Mara | 4.09 | 4.06 | 1.71 | 1.88 | 4.78 | 11.56 | 10.40 | 13.25 | Low | Low | Low | Low | Low | Good | Medium | Good |
| I11 | UIL.21.13286 | Chick Peas Almazraa | 4.76 | 4.71 | 0.87 | 0.54 | 6.21 | 0.90 | 12.08 | 12.45 | Low | Low | Low | Low | Medium | Low | Good | Good |
| I6 | UIL.21.13281 | Chick Peas California Garden | 5.77 | 5.71 | 0.91 | 0.65 | 7.68 | 0.93 | 14.25 | 11.28 | Medium | Medium | Low | Low | Medium | Low | Good | Good |
| I9 | UIL.21.13284 | Chick Peas Luna | 4.99 | 4.95 | 2.29 | 3.70 | 6.32 | 0.84 | 9.42 | 14.65 | Low | Low | Low | Low | Medium | Low | Medium | Good |
| A16 | UIL.21.14397 | Diamond Strawberry Jam | 13.67 | 13.51 | 0.44 | 1.35 | 25.57 | 70.93 | 0.78 | 0.64 | Good | Good | Low | Low | High | High | Low | Low |
| I8 | UIL.21.13283 | Foul Medamas Almazraa | 4.11 | 4.06 | 0.01 | 0.01 | 5.81 | 0.85 | 10.35 | 18.37 | Low | Low | Low | Low | Medium | Low | Medium | Good |
| J76 | UIL.21.14557 | Foul Medammas (American Garden) | 4.73 | 4.68 | 0.01 | 0.01 | 6.36 | 1.36 | 13.66 | 14.43 | Low | Low | Low | Low | Medium | Low | Good | Good |
| I1 | UIL.21.13276 | Green Giant Sweet Corn | 4.19 | 4.17 | 2.32 | 1.88 | 5.83 | 8.31 | 4.03 | 8.61 | Low | Low | Low | Low | Medium | Medium | Low | Medium |
| I10 | UIL.21.13285 | Green Peas Luna | 4.37 | 4.33 | 0.60 | 0.60 | 6.31 | 0.68 | 8.54 | 10.03 | Low | Low | Low | Low | Medium | Low | Medium | Medium |
| H36 | UIL.21.14555 | La Ming Beans In Tomato Sauce | 19.86 | 19.64 | 1.40 | 1.15 | 33.98 | 2.67 | 15.28 | 0.00 | Good | Good | Low | Low | High | Low | Good | Low |
| H26 | UIL.21.14556 | Luna Baked Beans In Tomato Sauce | 4.49 | 4.44 | 0.43 | 0.95 | 5.55 | 4.40 | 14.14 | 13.55 | Low | Low | Low | Low | Medium | Low | Good | Good |
| H27 | UIL.21.14558 | Lunafoul Medames Extra Grade Fava Beans | 5.03 | 4.98 | 0.59 | 1.05 | 6.42 | 1.30 | 14.60 | 13.97 | Low | Low | Low | Low | Medium | Low | Good | Good |
| J9 | UIL.21.14406 | Mango Pickle / Aeroplane | 4.04 | 4.05 | 5.83 | 6.15 | 3.70 | 0.11 | 2.92 | 213.36 | Low | Low | Medium | Medium | Low | Low | Low | High |
| J6 | UIL.21.14403 | Mango Pickles In Oil / Ahmed | 11.67 | 11.84 | 29.71 | 11.50 | 3.60 | 0.56 | 6.10 | 127.68 | Good | Good | High | Good | Low | Low | Medium | High |
| J8 | UIL.21.14405 | Mango Thokku Pickle In Oil / Priya | 8.35 | 8.32 | 6.01 | 5.15 | 10.78 | 24.89 | 8.14 | 189.25 | Medium | Medium | Medium | Medium | Medium | High | Medium | High |
| J77 | UIL.21.14559 | Peas processed | 4.29 | 4.24 | 0.01 | 0.01 | 6.61 | 2.74 | 7.98 | 9.09 | Low | Low | Low | Low | Medium | Low | Medium | Medium |
| I2 | UIL.21.13277 | Plain Medammes California Garden | 4.77 | 4.71 | 0.01 | 0.01 | 6.73 | 1.03 | 12.05 | 14.50 | Low | Low | Low | Low | Medium | Low | Good | Good |
| I12 | UIL.21.13287 | Processed Peas Almazraa | 4.03 | 3.98 | 0.01 | 0.01 | 5.93 | 1.82 | 8.95 | 13.78 | Low | Low | Low | Low | Medium | Low | Medium | Good |
| I4 | UIL.21.13279 | Processed Peas California Garden | 4.25 | 4.20 | 0.01 | 0.77 | 6.30 | 1.82 | 9.18 | 13.94 | Low | Low | Low | Low | Medium | Low | Medium | Good |
| I15 | UIL.21.13290 | Sweet Corn American Garden | 4.56 | 4.53 | 1.84 | 1.44 | 6.63 | 7.12 | 5.01 | 7.56 | Low | Low | Low | Low | Medium | Medium | Medium | Medium |
| I5 | UIL.21.13280 | Sweet Corn California Garden | 4.95 | 4.91 | 1.54 | 1.38 | 7.68 | 3.43 | 4.31 | 5.62 | Low | Low | Low | Low | Medium | Low | Low | Medium |
| I13 | UIL.21.13288 | Sweet Corn Libbys | 2.52 | 2.50 | 0.79 | 0.80 | 3.69 | 2.32 | 3.36 | 9.43 | Low | Low | Low | Low | Low | Low | Low | Medium |
| J7 | UIL.21.14404 | Tomato Paste / Alalali | 4.11 | 4.07 | 1.03 | 1.90 | 5.85 | 13.67 | 7.08 | 17.38 | Low | Low | Low | Low | Medium | Good | Medium | Good |
| J 2 | UIL.21.14399 | Tomato Paste / Almudhish | 4.90 | 4.86 | 1.46 | 1.95 | 6.48 | 11.56 | 10.30 | 0.02 | Low | Low | Low | Low | Medium | Good | Medium | Low |
| J 3 | UIL.21.14400 | Tomato Paste / Jumbo | 4.30 | 4.26 | 0.93 | 1.25 | 6.83 | 4.60 | 4.18 | 12.75 | Low | Low | Low | Low | Medium | Low | Low | Good |
| **Sr.No** | **Sample ID  (from lab)** | **Name of Product & Brand** | **Percentage reference intake (% RI) information** | | | | | | | | **Score of Percentage reference intake (% RI) Information** | | | | | | | |
| **%RI1 Energy (kJ)** | **%RI Energy (kcal)** | **%RI  Fat** | **%RI SFA3** | **%RI Carbohy-drates** | **%RI  Sugars** | **%RI Protein** | **%RI  Salt** | **Score %RI3  Energy  (kJ)** | **Score %RI  Energy (kcal)** | **Score %RI  Fat** | **Score %RI  Saturates** | **Score %RI  Carbohydrates** | **Score %RI  Sugars** | **Score %RI  Protein** | **Score %RI  Salt** |
| A13 | UIL.21.14394 | American Garden BBQ Sauce Original | 8.44 | 8.35 | 0.04 | 0.03 | 16.01 | 37.93 | 0.06 | 41.90 | Medium | Medium | Low | Low | Good | High | Low | High |
| 18 J | UIL.21.14415 | Classic Mayonnaise / Mazola | 35.63 | 36.38 | 113.16 | 68.21 | 1.37 | 4.13 | 0.14 | 21.10 | High | High | High | High | Low | Low | Low | High |
| 19 j | UIL.21.14416 | Creamy Classic Mayonnaise / Heinz | 18.26 | 18.57 | 51.21 | 36.60 | 4.67 | 3.84 | 0.14 | 34.17 | Good | Good | High | High | Low | Low | Low | High |
| A12 | UIL.21.14393 | Delicio 1000 Island | 18.39 | 18.72 | 52.76 | 33.21 | 3.71 | 15.87 | 1.71 | 44.04 | Good | Good | High | High | Low | Good | Low | High |
| A11 | UIL.21.14392 | Delicio French Dressing | 19.59 | 19.90 | 52.65 | 33.21 | 5.96 | 21.98 | 2.14 | 47.30 | Good | Good | High | High | Medium | High | Low | High |
| FA1 | UIL.21.13296 | Hayat Hot Sauce | 0.59 | 0.60 | 1.00 | 0.01 | 0.30 | 0.80 | 1.26 | 110.74 | Low | Low | Low | Low | Low | Low | Low | High |
| A14 | UIL.21.14395 | Heinz Classic BBQ Smokey And Rich | 7.16 | 7.08 | 0.50 | 0.75 | 12.99 | 31.87 | 1.70 | 20.98 | Medium | Medium | Low | Low | Good | High | Low | High |
| J 5 | UIL.21.14402 | Hot Sauce / Excellence | 2.22 | 2.19 | 0.01 | 0.01 | 4.08 | 10.88 | 0.66 | 96.93 | Low | Low | Low | Low | Low | Medium | Low | High |
| 20 J | UIL.21.14417 | Hot Sause / American Garden | 0.61 | 0.61 | 0.29 | 0.20 | 0.77 | 2.22 | 1.20 | 118.11 | Low | Low | Low | Low | Low | Low | Low | High |
| FA2 | UIL.21.13297 | Jumbo Hot Sauce | 0.29 | 0.29 | 0.14 | 0.01 | 0.33 | 0.64 | 0.68 | 68.17 | Low | Low | Low | Low | Low | Low | Low | High |
| A 33 | UIL.21.14563 | Knour Beef Flavoured Stock | 0.15 | 0.15 | 0.00 | 0.00 | 0.17 | 0.00 | 0.58 | 18.75 | Low | Low | Low | Low | Low | Low | Low | Good |
| H34 | UIL.21.14562 | Knour CHICKEN Stock | 0.16 | 0.15 | 0.00 | 0.00 | 0.20 | 0.00 | 0.50 | 19.50 | Low | Low | Low | Low | Low | Low | Low | Good |
| H35 | UIL.21.14561 | Knour Vegetable Stock Cubes | 0.14 | 0.14 | 0.00 | 0.00 | 0.14 | 0.00 | 0.62 | 22.83 | Low | Low | Low | Low | Low | Low | Low | High |
| H33 | UIL.21.14564 | Maggi Beef Flavour | 2.62 | 2.59 | 0.00 | 0.00 | 4.98 | 0.00 | 0.00 | 842.43 | Low | Low | Low | Low | Low | Low | Low | High |
| FA7 | UIL.21.13430 | Maggi Chicken Stock | 13.62 | 13.78 | 31.27 | 64.35 | 5.58 | 9.14 | 10.32 | 771.31 | Good | Good | High | High | Medium | Medium | Medium | High |
| A32 | UIL.21.14565 | Maggi Chicken Stock Less Salt | 5.89 | 5.82 | 0.00 | 0.00 | 11.19 | 0.00 | 0.00 | 625.69 | Medium | Medium | Low | Low | Good | Low | Low | High |
| J10 | UIL.21.14407 | Pizza Sauce Olive& Mushrooms / Alalali | 3.06 | 3.05 | 2.26 | 1.80 | 3.71 | 7.09 | 4.10 | 15.16 | Low | Low | Low | Low | Low | Medium | Low | Good |
| J 1 | UIL.21.14398 | Soy Sauce Classic / American Garden | 0.61 | 0.61 | 0.29 | 0.20 | 0.77 | 2.22 | 1.20 | 120.78 | Low | Low | Low | Low | Low | Low | Low | High |
| J4 | UIL.21.14401 | Tabasco Hot Sauce | 0.90 | 0.89 | 0.01 | 0.01 | 1.09 | 2.94 | 3.18 | 29.22 | Low | Low | Low | Low | Low | Low | Low | High |
| J11 | UIL.21.14408 | Tomato Ketchup / Hayat | 5.53 | 5.47 | 0.10 | 0.07 | 10.23 | 24.67 | 1.20 | 34.54 | Medium | Medium | Low | Low | Medium | High | Low | High |
| 16 J | UIL.21.14413 | Tomato Ketchup / Heinz | 5.00 | 4.94 | 0.01 | 0.01 | 8.96 | 25.09 | 2.80 | 30.54 | Low | Low | Low | Low | Medium | High | Low | High |
| 14 J | UIL.21.14411 | Tomato Ketchup/ Jumbo | 6.28 | 6.21 | 0.44 | 0.95 | 11.29 | 29.93 | 1.98 | 6.92 | Medium | Medium | Low | Low | Good | High | Low | Medium |
| A25 | UIL.21.14133 | Al Deyafa Fruit Cordial | 2.19 | 2.17 | 0.14 | 0.10 | 3.98 | 10.17 | 0.52 | 0.00 | Low | Low | Low | Low | Low | Medium | Low | Low |
| A22 | UIL.21.13828 | Al Deyafa Orange Flavour (Powder) | 13.02 | 12.87 | 0.00 | 0.00 | 24.74 | 67.32 | 0.00 | 0.64 | Good | Good | Low | Low | High | High | Low | Low |
| A20 | UIL.21.13850 | Al Marai Mango Juice | 19.38 | 19.15 | 0.00 | 0.00 | 36.82 | 105.21 | 0.02 | 0.01 | Good | Good | Low | Low | High | High | Low | Low |
| A26 | UIL.21.14134 | Al Rabie Fruit Cocktail Nectar | 3.24 | 3.20 | 0.14 | 0.01 | 5.92 | 13.12 | 0.76 | 0.00 | Low | Low | Low | Low | Medium | Good | Low | Low |
| A27 | UIL.21.14132 | Al Rawabi Apple Juice | 3.13 | 3.10 | 0.00 | 0.00 | 5.96 | 13.86 | 0.00 | 0.00 | Low | Low | Low | Low | Medium | Good | Low | Low |
| FA44 | UIL.21.14138 | Al Rawabi Red Grape Juice | 3.17 | 3.13 | 0.14 | 0.01 | 5.84 | 15.51 | 0.50 | 0.00 | Low | Low | Low | Low | Medium | Good | Low | Low |
| A28 | UIL.21.14135 | Almarai Graps And Berries (Farms Select ) | 2.92 | 2.89 | 0.07 | 0.01 | 5.42 | 15.12 | 0.52 | 0.00 | Low | Low | Low | Low | Medium | Good | Low | Low |
| H23 | UIL.21.13822 | Almarai Orange Juice 100% 300 ml | 2.43 | 2.40 | 0.00 | 0.00 | 3.69 | 10.43 | 4.80 | 0.00 | Low | Low | Low | Low | Low | Medium | Low | Low |
| H21 | UIL.21.13823 | Alrawabi Orange 1005juice | 2.23 | 2.20 | 0.00 | 0.00 | 4.23 | 7.39 | 0.00 | 2.54 | Low | Low | Low | Low | Low | Medium | Low | Low |
| H25 | UIL.21.13821 | Asafwa Natural Orange 200 ml | 2.62 | 2.59 | 0.00 | 0.00 | 4.98 | 11.39 | 0.00 | 6.99 | Low | Low | Low | Low | Low | Good | Low | Medium |
| FA45 | UIL.21.14139 | A'safwah Mixed Fruit Juice | 2.91 | 2.88 | 0.14 | 0.01 | 5.41 | 12.84 | 0.16 | 0.00 | Low | Low | Low | Low | Medium | Good | Low | Low |
| **Sr.No** | **Sample ID  (from lab)** | **Name of Product & Brand** | **Percentage reference intake (% RI) information** | | | | | | | | **Score of Percentage reference intake (% RI) Information** | | | | | | | |
| **%RI1 Energy (kJ)** | **%RI Energy (kcal)** | **%RI  Fat** | **%RI SFA2** | **%RI Carbohy-drates** | **%RI  Sugars** | **%RI Protein** | **%RI  Salt** | **Score %RI3  Energy  (kJ)** | **Score %RI  Energy (kcal)** | **Score %RI  Fat** | **Score %RI  Saturates** | **Score %RI  Carbohydrates** | **Score %RI  Sugars** | **Score %RI  Protein** | **Score %RI  Salt** |
| J69 | UIL.21.14143 | Fruit Drink (Orange) , Rani | 2.73 | 2.70 | 0.14 | 0.01 | 5.05 | 12.84 | 0.32 | 0.32 | Low | Low | Low | Low | Medium | Good | Low | Low |
| J71 | UIL.21.14142 | Fruit Nectar (Lacnor) | 2.73 | 2.70 | 0.14 | 0.01 | 5.08 | 14.14 | 0.18 | 0.07 | Low | Low | Low | Low | Medium | Good | Low | Low |
| H19 | UIL.21.13829 | Mango Juice Mazoon 200ml | 3.33 | 3.29 | 0.00 | 0.00 | 6.32 | 14.93 | 0.00 | 0.00 | Low | Low | Low | Low | Medium | Good | Low | Low |
| J49 | UIL.21.13824 | Mixed Fruit Juice (Mazoon) | 2.68 | 2.65 | 0.00 | 0.00 | 5.09 | 13.08 | 0.00 | 0.00 | Low | Low | Low | Low | Medium | Good | Low | Low |
| A30 | UIL.21.14136 | Nada Mango Juice | 2.64 | 2.61 | 0.01 | 0.01 | 4.92 | 11.67 | 0.52 | 0.00 | Low | Low | Low | Low | Low | Good | Low | Low |
| A29 | UIL.21.14137 | Nada Orange Juice | 2.24 | 2.22 | 0.07 | 0.01 | 3.95 | 11.62 | 1.40 | 0.00 | Low | Low | Low | Low | Low | Good | Low | Low |
| H20 | UIL.21.13827 | Natural Mango Asafwa 200ml | 2.78 | 2.75 | 0.00 | 0.00 | 5.28 | 14.59 | 0.00 | 0.22 | Low | Low | Low | Low | Medium | Good | Low | Low |
| J70 | UIL.21.14141 | Orange Drink (Top Fruit) | 2.47 | 2.45 | 0.14 | 0.01 | 4.58 | 11.91 | 0.18 | 0.24 | Low | Low | Low | Low | Low | Good | Low | Low |
| SI2 | UIL.21.13826 | Orange No Add Sugar (Top Fruit) | 2.11 | 2.09 | 0.00 | 0.00 | 4.02 | 10.16 | 0.00 | 0.36 | Low | Low | Low | Low | Low | Medium | Low | Low |
| H28 | UIL.21.14140 | Sun Top Orange Fruit Drink | 2.68 | 2.65 | 0.14 | 0.01 | 4.87 | 13.16 | 0.70 | 0.15 | Low | Low | Low | Low | Low | Good | Low | Low |
| J24 | UIL.21.17402 | Tang (Orange) (Powder) | 19.62 | 19.39 | 0.00 | 0.00 | 37.28 | 107.69 | 0.08 | 7.66 | Good | Good | Low | Low | High | High | Low | Medium |
| H22 | UIL.21.13825 | Top fruit Fruit Cocktail 200ml | 2.30 | 2.28 | 0.00 | 0.00 | 4.38 | 10.31 | 0.00 | 0.97 | Low | Low | Low | Low | Low | Medium | Low | Low |
| A21 | UIL.21.13851 | Vimto | 2.55 | 2.52 | 0.00 | 0.00 | 4.84 | 13.77 | 0.00 | 0.00 | Low | Low | Low | Low | Low | Good | Low | Low |
| J62 | UIL.21.14129 | Evaporated Milk (Rainbow) | 7.24 | 7.28 | 12.64 | 31.25 | 4.07 | 10.60 | 11.88 | 4.46 | Medium | Medium | Good | High | Low | Medium | Good | Low |
| H6 | UIL.21.13450 | Galaxy Smooth Milk | 19.63 | 19.40 | 0.55 | 0.38 | 35.50 | 81.20 | 7.69 | 0.00 | Good | Good | Low | Low | High | High | Medium | Low |
| FA39 | UIL.21.13551 | Mazoon Fresh Milk Strawberry Flavour | 4.21 | 4.21 | 4.59 | 11.80 | 4.13 | 7.19 | 6.14 | 2.29 | Low | Low | Low | Good | Low | Medium | Medium | Low |
| J60 | UIL.21.14570 | Milk Powder (Almudhish) | 26.21 | 26.34 | 42.17 | 96.20 | 15.53 | 43.28 | 49.76 | 11.89 | High | High | High | High | Good | High | High | Good |
| J61 | UIL.21.14569 | Milk Powder (Majan) | 26.04 | 26.16 | 41.73 | 100.95 | 15.77 | 53.14 | 48.20 | 13.96 | High | High | High | High | Good | High | High | Good |
| J31 | UIL.21.13553 | Strawberry flavored milk | 4.17 | 4.16 | 3.58 | 8.70 | 4.67 | 13.36 | 6.07 | 2.46 | Low | Low | Low | Medium | Low | Good | Medium | Low |
| J73 | UIL.21.14171 | Strawberry Flavored Milk (Lacnor) | 4.22 | 4.22 | 4.66 | 9.70 | 4.22 | 10.93 | 5.64 | 2.94 | Low | Low | Low | Medium | Low | Medium | Medium | Low |
| J72 | UIL.21.14170 | Strawberry Fresh Milk (Alrawabi) | 4.22 | 4.22 | 4.59 | 11.35 | 4.49 | 10.74 | 4.36 | 2.07 | Low | Low | Low | Good | Low | Medium | Low | Low |
| J29 | UIL.21.13552 | Strawberry Milk (Nada) | 4.62 | 4.60 | 3.46 | 8.90 | 5.44 | 15.71 | 6.84 | 2.47 | Low | Low | Low | Medium | Medium | Good | Medium | Low |
| J30 | UIL.21.13554 | Strwaberry Milk (Asafwah) | 4.58 | 4.58 | 4.69 | 11.61 | 4.41 | 13.08 | 8.10 | 6.38 | Low | Low | Low | Good | Low | Good | Medium | Medium |
| J63 | UIL.21.14130 | Tea Milk (Almudhish) | 6.80 | 6.84 | 11.60 | 20.25 | 4.02 | 10.31 | 10.98 | 4.47 | Medium | Medium | Good | High | Low | Medium | Medium | Low |
| J34 | UIL.21.14173 | Energy drink (Red bull) | 2.35 | 2.32 | 0.01 | 0.01 | 4.45 | 11.28 | 0.02 | 1.91 | Low | Low | Low | Low | Low | Good | Low | Low |
| A24 | UIL.21.13849 | Power Horse Energy | 2.40 | 2.37 | 0.00 | 0.00 | 4.54 | 12.53 | 0.08 | 2.80 | Low | Low | Low | Low | Low | Good | Low | Low |
| J38 | UIL.21.14174 | Coca cola | 2.22 | 2.20 | 0.01 | 0.01 | 4.21 | 10.87 | 0.02 | 0.65 | Low | Low | Low | Low | Low | Medium | Low | Low |
| A31 | UIL.21.14172 | Lipton Peach Ice tea | 0.94 | 0.93 | 0.01 | 0.01 | 1.73 | 4.89 | 0.20 | 0.45 | Low | Low | Low | Low | Low | Low | Low | Low |
| J32 | UIL.21.14177 | Malt beverage (Barbican) | 0.66 | 0.65 | 0.01 | 0.01 | 1.14 | 2.47 | 0.52 | 0.43 | Low | Low | Low | Low | Low | Low | Low | Low |

| **Sr.No** | **Sample ID  (from lab)** | **Name of Product & Brand** | **Percentage reference intake (% RI) information** | | | | | | | | **Score of Percentage reference intake (% RI) Information** | | | | | | | |
| --- | --- | --- | --- | --- | --- | --- | --- | --- | --- | --- | --- | --- | --- | --- | --- | --- | --- | --- |
| **%RI1 Energy (kJ)** | **%RI Energy (kcal)** | **%RI  Fat** | **%RI SFA2** | **%RI Carbohy-drates** | **%RI  Sugars** | **%RI Protein** | **%RI  Salt** | **Score %RI3  Energy  (kJ)** | **Score %RI  Energy (kcal)** | **Score %RI  Fat** | **Score %RI  Saturates** | **Score %RI  Carbohydrates** | **Score %RI  Sugars** | **Score %RI  Protein** | **Score %RI  Salt** |
| J35 | UIL.21.14176 | Mountain Dew | 2.50 | 2.47 | 0.01 | 0.01 | 4.73 | 12.83 | 0.02 | 0.66 | Low | Low | Low | Low | Low | Good | Low | Low |
| J36 | UIL.21.14175 | Pepsi | 2.07 | 2.05 | 0.01 | 0.01 | 3.92 | 11.09 | 0.02 | 0.44 | Low | Low | Low | Low | Low | Good | Low | Low |
| J33 | UIL.21.14178 | Vitaene Extra (Pokka) | 3.00 | 2.96 | 0.01 | 0.01 | 5.68 | 14.84 | 0.02 | 0.00 | Low | Low | Low | Low | Medium | Good | Low | Low |

1: %RI = percent of reference intake. 2: SFA = Saturated Fatty Acid. 3: Score % RI = the formula used score % RI = ((Amount of per 100 g/ml)/RI) * 100

The food item is considered a “low” source of the considered nutrient if the percentage of reference intake (% RI) is < 5%; “medium” if between 5 and 10%; “good source” if % RI between 11 and 20%; “high” if % RI > 20%.

**Table 7**: Label and laboratory values comparison

| **id_lab** | **Name of Product & Brand** | **Amounts per 100 g/ml  from Laboratory analyses** | | | | | | **Amounts per 100 g/ml  from Labelling** | | | | | | **Tolerances for the nutrition declaration on food products** | | | | | | | | | | | |
| --- | --- | --- | --- | --- | --- | --- | --- | --- | --- | --- | --- | --- | --- | --- | --- | --- | --- | --- | --- | --- | --- | --- | --- | --- | --- |
| **Prot (g)** | | **Carb (g)** | | **TF (g)** | | **SFA (g)** | | **Sugars (g)** | | **Na (g)** | |
| **Prot1 (g)** | **Carb2 (g)** | **TF3 (g)** | **SFA4 (g)** | **Sugars  (g)** | **Na5 (g)** | **Prot (g)** | **Carb (g)** | **TF (g)** | **SFA (g)** | **Sugars  (g)** | **Na  (g)** | **Low** | **High** | **Low** | **High** | **Low** | **High** | **Low** | **High** | **Low** | **High** | **Low** | **High** |
| UIL.21.14414 | Natural Honey / Alshifa | 0.00 | 83.64 | 0.00 | 0.00 | 80.30 | 0.000 | 0.00 | 83.00 | 0.00 | 0.00 | 71.00 | 0.000 | 0.00 | 0.00 | 75.00 | 91.00 | 0.00 | 0.00 | 0.00 | 0.00 | 63.00 | 79.00 | 0.00 | 0.00 |
| UIL.21.14412 | Pure honey / Capilano | 0.00 | 81.94 | 0.00 | 0.00 | 81.00 | 0.000 | 0.30 | 83.10 | 0.00 | 0.00 | 82.50 | 0.015 | 0.00 | 2.30 | 75.10 | 91.10 | 0.00 | 0.00 | 0.00 | 0.00 | 74.50 | 90.50 | 0.00 | 0.17 |
| UIL.21.13442 | BATOOK SPECIALMINT CHEWING GUM | 1.20 | 90.40 | 0.40 | 0.08 | 2.00 | 0.000 | 0.00 | 2.00 | 0.00 |  | 2.00 | 0.000 | 0.00 | 0.00 | 0.00 | 4.00 | 0.00 | 0.00 |  |  | 0.00 | 4.00 | 0.00 | 0.00 |
| UIL.21.13439 | BOUNTY MINIS | 9.54 | 67.70 | 14.34 | 8.38 | 15.02 | 0.321 | 1.00 | 17.00 | 7.00 | 6.00 | 14.00 | 0.028 | 0.00 | 3.00 | 13.60 | 20.40 | 5.50 | 8.50 | 4.80 | 7.20 | 11.20 | 16.80 | 0.00 | 0.18 |
| UIL.21.13560 | CREAM CARAMEL ALMARAEI | 3.23 | 22.76 | 2.23 | 1.66 | 20.92 | 0.060 | 3.00 | 22.00 | 2.00 | 1.00 | 21.00 | 0.054 | 1.00 | 5.00 | 17.60 | 26.40 | 0.50 | 3.50 | 0.20 | 1.80 | 16.80 | 25.20 | 0.00 | 0.20 |
| UIL.21.14410 | Custard powder / Alalali | 0.01 | 90.75 | 0.01 | 0.00 | 0.10 | 0.081 | 0.00 | 91.00 | 0.00 | 0.00 | 0.00 | 0.080 | 0.00 | 0.00 | 83.00 | 99.00 | 0.00 | 0.00 | 0.00 | 0.00 | 0.00 | 0.00 | 0.00 | 0.23 |
| UIL.21.14409 | Custard powder/Tiara | 0.32 | 87.95 | 0.23 | 0.14 | 0.21 | 0.000 |  |  |  |  |  |  |  |  |  |  |  |  |  |  |  |  |  |  |
| UIL.21.14396 | daily fresh/ custard powder | 0.33 | 83.23 | 0.64 | 0.21 | 3.07 | 0.700 | 0.10 | 82.20 | 0.50 | 0.10 |  | 0.698 | 0.00 | 2.10 | 74.20 | 90.20 | 0.00 | 2.00 | 0.00 | 0.90 |  |  | 0.56 | 0.84 |
| UIL.21.13550 | DANET CREAM CARAMEL | 3.41 | 20.38 | 2.21 | 1.59 | 17.80 | 0.063 | 29.00 | 21.00 | 2.00 |  |  | 0.000 | 23.20 | 34.80 | 16.80 | 25.20 | 0.50 | 3.50 |  |  |  |  | 0.00 | 0.00 |
| UIL.21.13441 | EXTRA PEPPERMINT | 1.05 | 125.26 | 0.53 | 0.11 | 52.63 | 0.000 | 0.00 | 1.00 | 0.00 | 0.00 | 0.00 | 0.000 | 0.00 | 0.00 | 0.00 | 3.00 | 0.00 | 0.00 | 0.00 | 0.00 | 0.00 | 0.00 | 0.00 | 0.00 |
| UIL.21.13435 | KINDER JOY | 8.72 | 55.23 | 32.22 | 15.15 | 49.62 | 0.192 | 8.20 | 58.00 | 32.00 | 15.00 | 51.00 | 0.125 | 6.20 | 10.20 | 50.00 | 66.00 | 25.60 | 38.40 | 12.00 | 18.00 | 43.00 | 59.00 | 0.00 | 0.28 |
| UIL.21.13437 | KITKAT | 8.03 | 63.82 | 25.29 | 13.76 | 45.37 | 0.073 | 7.90 | 59.90 | 25.00 | 13.80 | 46.00 | 0.070 | 5.90 | 9.90 | 51.90 | 67.90 | 20.00 | 30.00 | 11.04 | 16.56 | 38.00 | 54.00 | 0.00 | 0.22 |
| UIL.21.13440 | MARS MINIS | 4.31 | 73.69 | 17.92 | 11.54 | 57.77 | 0.222 | 0.50 | 9.00 | 2.00 | 1.00 | 8.00 | 0.016 | 0.00 | 2.50 | 7.00 | 11.00 | 0.50 | 3.50 | 0.20 | 1.80 | 6.00 | 10.00 | 0.00 | 0.17 |
| UIL.21.13444 | MENTOS SUGARFREE CHEWING GUM | 1.14 | 93.14 | 0.57 | 0.11 | 32.00 | 0.000 | 0.00 | 1.30 | 0.00 | 0.00 | 0.00 | 0.000 | 0.00 | 0.00 | 0.00 | 3.30 | 0.00 | 0.00 | 0.00 | 0.00 | 0.00 | 0.00 | 0.00 | 0.00 |
| UIL.21.14391 | Nutella hazelnut spread with cocoa | 5.40 | 60.98 | 31.20 | 10.53 | 57.94 | 0.044 | 6.30 | 61.00 | 31.00 | 10.60 | 56.00 | 0.042 | 4.30 | 8.30 | 53.00 | 69.00 | 24.80 | 37.20 | 8.48 | 12.72 | 48.00 | 64.00 | 0.00 | 0.19 |
| UIL.21.13438 | SNICKERS MINIS | 9.27 | 57.73 | 26.80 | 6.73 | 52.53 | 0.263 | 1.20 | 9.00 | 4.00 | 2.00 | 8.00 | 0.033 | 0.00 | 3.20 | 7.00 | 11.00 | 2.50 | 5.50 | 1.20 | 2.80 | 6.00 | 10.00 | 0.00 | 0.18 |
| UIL.21.13454 | Twix minis | 4.85 | 68.95 | 25.35 | 11.45 | 48.60 | 0.186 | 0.90 | 14.00 | 5.00 | 3.00 | 10.00 | 0.032 | 0.00 | 2.90 | 11.20 | 16.80 | 3.50 | 6.50 | 2.20 | 3.80 | 8.00 | 12.00 | 0.00 | 0.18 |
| UIL.21.13443 | WRIGLEYS DOUBLEMINT CHEWING GUM | 0.77 | 91.54 | 0.38 | 0.08 | 81.54 | 0.000 | 0.00 | 2.00 | 0.00 | 0.00 | 2.00 | 0.000 | 0.00 | 0.00 | 0.00 | 4.00 | 0.00 | 0.00 | 0.00 | 0.00 | 0.00 | 4.00 | 0.00 | 0.00 |
| UIL.21.14384 | Al Mudhish puffed corn cheese balls | 6.42 | 55.17 | 35.75 | 16.58 | 4.42 | 0.621 | 0.60 | 7.00 | 4.20 | 1.80 | 0.30 | 0.073 | 0.00 | 2.60 | 5.00 | 9.00 | 2.70 | 5.70 | 1.00 | 2.60 | 0.00 | 2.30 | 0.00 | 0.22 |
| UIL.21.13433 | ALRIFAI MIXED NUTS | 21.39 | 40.00 | 32.43 | 4.64 | 7.18 | 0.240 | 5.00 | 11.00 | 9.00 | 1.00 | 2.00 | 0.064 | 3.00 | 7.00 | 8.80 | 13.20 | 7.50 | 10.50 | 0.20 | 1.80 | 0.00 | 4.00 | 0.00 | 0.21 |
| UIL.21.13431 | AMERICAN GARDEN POPCORN BUTTER | 7.70 | 55.15 | 24.42 | 10.91 | 0.30 | 0.985 | 3.00 | 19.00 | 8.00 | 4.00 | 0.00 | 0.320 | 1.00 | 5.00 | 15.20 | 22.80 | 6.50 | 9.50 | 3.20 | 4.80 | 0.00 | 0.00 | 0.17 | 0.47 |
| UIL.21.13432 | BEST SALTED MIXED NUTS | 24.52 | 19.56 | 51.89 | 8.31 | 4.28 | 0.336 | 24.20 | 19.40 | 51.70 | 8.00 | 4.40 | 0.320 | 19.36 | 29.04 | 15.52 | 23.28 | 43.70 | 59.70 | 6.40 | 9.60 | 2.40 | 6.40 | 0.17 | 0.47 |
| UIL.21.17408 | Cheese balls (Mr. Krispy) | 6.80 | 61.87 | 34.33 | 7.67 | 7.47 | 1.542 | 1.00 | 9.00 | 5.00 | 1.00 | 1.00 | 0.220 | 0.00 | 3.00 | 7.00 | 11.00 | 3.50 | 6.50 | 0.20 | 1.80 | 0.00 | 3.00 | 0.07 | 0.37 |
| UIL.21.14418 | Cheese balls(pofak oman) | 9.89 | 46.98 | 39.15 | 16.79 | 4.17 | 0.589 | 9.63 | 48.20 | 28.80 |  |  | 0.590 | 7.63 | 11.63 | 40.20 | 56.20 | 23.04 | 34.56 |  |  |  |  | 0.47 | 0.71 |
| UIL.21.14551 | Cheese pastry (Dhahabi)) | 11.57 | 41.35 | 18.54 | 4.74 | 3.85 | 0.307 | 10.59 | 42.61 | 18.24 | 4.20 | 2.22 | 0.307 | 8.47 | 12.71 | 34.61 | 50.61 | 14.59 | 21.89 | 3.36 | 5.04 | 0.22 | 4.22 | 0.16 | 0.46 |
| UIL.21.13463 | Cheetos /Flamin Hot | 5.93 | 59.57 | 34.63 | 9.73 | 1.07 | 0.701 | 1.60 | 16.00 | 10.00 | 2.90 | 0.30 | 0.203 | 0.00 | 3.60 | 12.80 | 19.20 | 8.00 | 12.00 | 2.10 | 3.70 | 0.00 | 2.30 | 0.05 | 0.35 |
| UIL.21.14386 | chips Oman | 6.54 | 47.63 | 38.77 | 16.89 | 0.00 | 0.503 | 5.00 |  | 73.00 |  |  | 0.500 | 3.00 | 7.00 |  |  | 65.00 | 81.00 |  |  |  |  | 0.40 | 0.60 |
| UIL.21.14383 | Lay's ( salt) | 7.50 | 53.71 | 35.50 | 16.07 | 0.00 | 0.594 | 1.00 | 6.70 | 5.00 | 2.20 | 0.10 | 0.082 | 0.00 | 3.00 | 4.70 | 8.70 | 3.50 | 6.50 | 1.40 | 3.00 | 0.00 | 2.10 | 0.00 | 0.23 |
| UIL.21.14390 | Mani ( mixed Nuts ) | 26.01 | 18.95 | 49.33 | 7.92 | 8.55 | 0.316 | 24.50 | 21.70 | 49.00 | 7.50 | 4.60 | 0.315 | 19.60 | 29.40 | 17.36 | 26.04 | 41.00 | 57.00 | 6.00 | 9.00 | 2.60 | 6.60 | 0.17 | 0.47 |
| UIL.21.13458 | Nabil cracker salted biscuits | 9.58 | 65.90 | 19.26 | 13.50 | 20.04 | 0.999 | 9.40 | 65.90 | 19.10 | 12.60 | 20.20 | 0.993 | 7.40 | 11.40 | 57.90 | 73.90 | 15.28 | 22.92 | 10.08 | 15.12 | 16.16 | 24.24 | 0.79 | 1.19 |
| UIL.21.14389 | Popcorn cheese / American garden | 6.58 | 48.52 | 34.21 | 15.67 | 0.00 | 0.989 | 2.00 | 16.00 | 11.00 | 5.50 | 0.00 | 0.320 | 0.00 | 4.00 | 12.80 | 19.20 | 8.80 | 13.20 | 4.40 | 6.60 | 0.00 | 0.00 | 0.17 | 0.47 |
| UIL.21.14385 | potato chips ready salted | 7.11 | 52.14 | 36.11 | 15.75 | 0.00 | 0.536 | 1.90 | 15.00 | 10.00 | 4.50 | 0.06 | 0.140 | 0.00 | 3.90 | 12.00 | 18.00 | 8.00 | 12.00 | 3.60 | 5.40 | 0.00 | 2.06 | 0.00 | 0.29 |
| UIL.21.13462 | Pringles original | 4.53 | 58.06 | 33.49 | 3.53 | 1.05 | 0.453 | 4.30 | 55.00 | 33.00 | 3.10 | 1.20 | 0.440 | 2.30 | 6.30 | 47.00 | 63.00 | 26.40 | 39.60 | 2.30 | 3.90 | 0.00 | 3.20 | 0.29 | 0.59 |
| UIL.21.14388 | Shai ( mix Nut) | 25.21 | 20.69 | 48.44 | 6.87 | 6.85 | 0.151 |  |  |  |  |  |  |  |  |  |  |  |  |  |  |  |  |  |  |
| UIL.21.14560 | Sohar chips | 3.18 | 60.81 | 32.36 | 14.31 | 0.00 | 0.951 | 2.53 | 60.72 | 31.71 |  |  | 0.950 | 0.53 | 4.53 | 52.72 | 68.72 | 25.37 | 38.05 |  |  |  |  | 0.76 | 1.14 |
| UIL.21.13833 | vanilla icecream (Igloo) | 3.74 | 20.53 | 11.13 | 6.68 | 18.60 | 0.068 | 2.00 | 12.00 | 4.00 | 3.00 | 11.00 | 0.034 | 0.00 | 4.00 | 9.60 | 14.40 | 2.50 | 5.50 | 2.20 | 3.80 | 8.80 | 13.20 | 0.00 | 0.18 |
| UIL.21.13832 | vanilla icecream (Mazoon) | 3.09 | 13.73 | 7.66 | 4.46 | 12.37 | 0.046 | 2.00 | 13.00 | 7.00 | 4.50 | 8.00 | 0.040 | 0.00 | 4.00 | 10.40 | 15.60 | 5.50 | 8.50 | 3.60 | 5.40 | 6.00 | 10.00 | 0.00 | 0.19 |
| UIL.21.13300 | KELLOGGS Coco Pops | 9.54 | 80.62 | 2.48 | 1.15 | 24.48 | 0.000 | 9.00 | 75.00 | 2.50 | 0.90 | 27.00 | 0.312 | 7.00 | 11.00 | 67.00 | 83.00 | 1.00 | 4.00 | 0.10 | 1.70 | 21.60 | 32.40 | 0.16 | 0.46 |
| UIL.21.14387 | Kelloggs special ( cereal) | 18.26 | 72.92 | 2.21 | 0.59 | 13.92 | 0.696 | 7.00 | 29.00 | 0.50 | 0.00 | 5.00 | 0.270 | 5.00 | 9.00 | 23.20 | 34.80 | 0.00 | 2.00 | 0.00 | 0.00 | 3.00 | 7.00 | 0.12 | 0.42 |
| **id_lab** | **Name of Product & Brand** | **Amounts per 100 g/ml  from Laboratory analyses** | | | | | | **Amounts per 100 g/ml  from Labelling** | | | | | | **Tolerances for the nutrition declaration on food products** | | | | | | | | | | | |
| **Prot (g)** | | **Carb (g)** | | **TF (g)** | | **SFA (g)** | | **Sugars (g)** | | **Na (g)** | |
| **Prot1 (g)** | **Carb2 (g)** | **TF3 (g)** | **SFA4 (g)** | **Sugars  (g)** | **Na5 (g)** | **Prot (g)** | **Carb (g)** | **TF (g)** | **SFA (g)** | **Sugars  (g)** | **Na  (g)** | **Low** | **High** | **Low** | **High** | **Low** | **High** | **Low** | **High** | **Low** | **High** | **Low** | **High** |
| UIL.21.13299 | NESTLE Chocapic | 8.76 | 82.06 | 4.79 | 1.50 | 24.95 | 0.102 | 8.60 | 73.30 | 4.60 | 1.30 | 24.90 | 0.090 | 6.60 | 10.60 | 65.30 | 81.30 | 3.10 | 6.10 | 0.50 | 2.10 | 19.92 | 29.88 | 0.00 | 0.24 |
| UIL.21.13298 | NESTLE Gold Corn flakes | 7.24 | 84.19 | 1.96 | 0.38 | 10.57 | 0.426 | 7.10 | 79.90 | 1.90 | 0.40 | 10.70 | 0.430 | 5.10 | 9.10 | 71.90 | 87.90 | 0.40 | 3.40 | 0.00 | 1.20 | 8.56 | 12.84 | 0.28 | 0.58 |
| UIL.21.14574 | 7 days mini croissant | 9.45 | 44.27 | 28.55 | 16.73 | 16.82 | 0.203 | 1.00 | 5.00 | 3.00 | 1.00 | 2.00 | 0.022 | 0.00 | 3.00 | 3.00 | 7.00 | 1.50 | 4.50 | 0.20 | 1.80 | 0.00 | 4.00 | 0.00 | 0.17 |
| UIL.21.13460 | Americana premium butter cookies | 6.17 | 70.51 | 20.27 | 9.16 | 29.40 | 0.113 | 6.00 | 70.00 | 20.00 | 8.14 | 30.00 | 0.110 | 4.00 | 8.00 | 62.00 | 78.00 | 16.00 | 24.00 | 6.51 | 9.77 | 24.00 | 36.00 | 0.00 | 0.26 |
| UIL.21.14552 | Apple pastry | 5.91 | 48.89 | 15.74 | 8.37 | 16.32 | 0.012 | 6.54 | 48.71 | 15.26 | 8.10 | 15.14 | 0.012 | 4.54 | 8.54 | 40.71 | 56.71 | 12.21 | 18.31 | 6.48 | 9.72 | 12.11 | 18.17 | 0.00 | 0.16 |
| UIL.21.17405 | Apple puff (Lusine) | 8.90 | 47.91 | 13.10 | 5.89 | 19.66 | 0.275 | 6.00 | 33.00 | 9.00 | 4.00 | 13.00 | 0.187 | 4.00 | 8.00 | 26.40 | 39.60 | 7.50 | 10.50 | 3.20 | 4.80 | 10.40 | 15.60 | 0.04 | 0.34 |
| UIL.21.14566 | Atyab twin cake vanilla | 5.82 | 56.21 | 18.43 | 7.17 | 27.82 | 0.222 | 4.10 | 55.80 | 17.50 | 8.30 | 26.50 | 0.213 | 2.10 | 6.10 | 47.80 | 63.80 | 14.00 | 21.00 | 6.64 | 9.96 | 21.20 | 31.80 | 0.06 | 0.36 |
| UIL.21.13451 | Britannia chocolate flavoured premium crème wafer | 6.88 | 64.50 | 25.38 | 15.75 | 33.81 | 0.248 | 7.00 | 63.00 | 25.00 | 22.00 | 35.00 | 0.235 | 5.00 | 9.00 | 55.00 | 71.00 | 20.00 | 30.00 | 17.60 | 26.40 | 28.00 | 42.00 | 0.09 | 0.39 |
| UIL.21.17406 | Cheese puff (Lusine) | 10.17 | 36.17 | 22.03 | 10.30 | 8.77 | 0.616 | 7.00 | 25.00 | 15.00 | 7.00 | 6.00 | 0.422 | 5.00 | 9.00 | 20.00 | 30.00 | 12.00 | 18.00 | 5.60 | 8.40 | 4.00 | 8.00 | 0.27 | 0.57 |
| UIL.21.14568 | Chocolate jumbo croissant | 7.75 | 44.45 | 23.69 | 13.05 | 12.08 | 0.200 | 8.31 | 42.94 | 23.05 | 11.25 | 10.52 | 0.191 | 6.31 | 10.31 | 34.94 | 50.94 | 18.44 | 27.66 | 9.00 | 13.50 | 8.42 | 12.62 | 0.04 | 0.34 |
| UIL.21.17531 | Croissant (Dhahabi) | 7.21 | 50.11 | 23.18 | 10.21 | 11.95 | 0.622 | 6.90 | 49.40 | 22.90 | 10.00 | 11.60 | 0.611 | 4.90 | 8.90 | 41.40 | 57.40 | 18.32 | 27.48 | 8.00 | 12.00 | 9.28 | 13.92 | 0.49 | 0.73 |
| UIL.21.13461 | Danish Butter Cookies | 5.52 | 64.88 | 25.44 | 18.34 | 26.04 | 0.126 | 5.40 | 65.00 | 25.00 | 17.00 | 26.00 | 0.124 | 3.40 | 7.40 | 57.00 | 73.00 | 20.00 | 30.00 | 13.60 | 20.40 | 20.80 | 31.20 | 0.00 | 0.27 |
| UIL.21.17407 | Donut (Switz) | 6.63 | 55.09 | 17.57 | 5.57 | 19.74 | 0.241 | 2.00 | 19.00 | 6.00 | 1.50 | 6.00 | 0.080 | 0.00 | 4.00 | 15.20 | 22.80 | 4.50 | 7.50 | 0.70 | 2.30 | 4.00 | 8.00 | 0.00 | 0.23 |
| UIL.21.13457 | Lotus biscoff | 5.64 | 73.72 | 19.36 | 13.59 | 36.41 | 0.413 | 0.40 | 5.70 | 1.50 | 0.60 | 3.00 | 0.029 | 0.00 | 2.40 | 3.70 | 7.70 | 0.00 | 3.00 | 0.00 | 1.40 | 1.00 | 5.00 | 0.00 | 0.18 |
| UIL.21.13446 | Nabil cream wafers (chocolate flavour) | 5.61 | 70.25 | 21.29 | 12.74 | 20.63 | 0.147 | 5.40 | 69.25 | 21.14 | 18.25 | 20.66 | 0.120 | 3.40 | 7.40 | 61.25 | 77.25 | 16.91 | 25.37 | 14.60 | 21.90 | 16.53 | 24.79 | 0.00 | 0.27 |
| UIL.21.13445 | Nabil glucose | 9.30 | 73.57 | 14.36 | 7.42 | 14.88 | 0.000 | 9.10 | 72.90 | 14.20 | 8.90 | 15.00 | 0.128 | 7.10 | 11.10 | 64.90 | 80.90 | 11.36 | 17.04 | 7.12 | 10.68 | 12.00 | 18.00 | 0.00 | 0.28 |
| UIL.21.13447 | Nabil Nice (sugar sprinkled coconut biscuits) | 9.52 | 71.75 | 15.36 | 7.12 | 21.16 | 0.375 | 9.00 | 71.80 | 15.00 | 9.70 | 22.00 | 0.370 | 7.00 | 11.00 | 63.80 | 79.80 | 12.00 | 18.00 | 7.76 | 11.64 | 17.60 | 26.40 | 0.22 | 0.52 |
| UIL.21.13452 | Nutro chocolate flavoured cream wafers | 3.50 | 62.53 | 30.20 | 26.80 | 36.17 | 0.204 | 5.00 | 62.00 | 29.00 | 23.00 | 38.00 | 0.160 | 3.00 | 7.00 | 54.00 | 70.00 | 23.20 | 34.80 | 18.40 | 27.60 | 30.40 | 45.60 | 0.01 | 0.31 |
| UIL.21.13459 | Original Oreo | 5.32 | 71.58 | 19.47 | 8.79 | 42.11 | 0.582 | 1.00 | 13.00 | 3.70 | 1.60 | 8.00 | 0.105 | 0.00 | 3.00 | 10.40 | 15.60 | 2.20 | 5.20 | 0.80 | 2.40 | 6.00 | 10.00 | 0.00 | 0.26 |
| UIL.21.14567 | Switz Mini cupcake vanilla | 7.13 | 48.59 | 29.41 | 12.75 | 29.00 | 0.404 | 2.00 | 15.00 | 9.00 | 4.00 | 9.00 | 0.120 | 0.00 | 4.00 | 12.00 | 18.00 | 7.50 | 10.50 | 3.20 | 4.80 | 7.00 | 11.00 | 0.00 | 0.27 |
| UIL.21.13453 | tiffany Crunch and cream | 8.65 | 64.63 | 24.36 | 21.51 | 36.23 | 0.120 | 8.40 | 59.80 | 24.00 | 19.40 | 36.40 | 0.116 | 6.40 | 10.40 | 51.80 | 67.80 | 19.20 | 28.80 | 15.52 | 23.28 | 29.12 | 43.68 | 0.00 | 0.27 |
| UIL.21.13449 | TIFFANY Everyday NICE (Sugar sprinkled coconut biscuits) | 6.45 | 71.29 | 20.32 | 9.16 | 25.48 | 0.355 | 2.10 | 21.50 | 6.30 | 3.70 | 8.00 | 0.069 | 0.10 | 4.10 | 17.20 | 25.80 | 4.80 | 7.80 | 2.90 | 4.50 | 6.00 | 10.00 | 0.00 | 0.22 |
| UIL.21.13448 | Tiffany Glucose (milk and honey biscuits) | 7.42 | 72.26 | 17.84 | 9.16 | 22.90 | 0.356 | 2.20 | 22.20 | 5.50 | 2.90 | 7.20 | 0.108 | 0.20 | 4.20 | 17.76 | 26.64 | 4.00 | 7.00 | 2.10 | 3.70 | 5.20 | 9.20 | 0.00 | 0.26 |
| UIL.21.17403 | ACTIVIA FULL FAT FRESH LABAN | 3.20 | 4.65 | 3.28 | 2.26 | 4.46 | 0.052 | 3.00 | 4.60 | 3.60 | 2.30 | 4.60 | 0.048 | 1.00 | 5.00 | 2.60 | 6.60 | 2.10 | 5.10 | 1.50 | 3.10 | 2.60 | 6.60 | 0.00 | 0.20 |
| UIL.21.17409 | ACTIVIA FULL FAT PLAIN YOGHURT | 2.77 | 3.75 | 2.08 | 1.53 | 3.32 | 0.035 | 4.00 | 5.40 | 3.00 | 2.00 | 5.40 | 0.049 | 2.00 | 6.00 | 3.40 | 7.40 | 1.50 | 4.50 | 1.20 | 2.80 | 3.40 | 7.40 | 0.00 | 0.20 |
| UIL.21.13544 | ALMARAI FRESH LABAN FULL FAT | 3.07 | 4.33 | 3.64 | 2.57 | 4.09 | 0.055 | 5.00 | 8.00 | 6.00 | 4.00 | 8.00 | 0.097 | 3.00 | 7.00 | 6.00 | 10.00 | 4.50 | 7.50 | 3.20 | 4.80 | 6.00 | 10.00 | 0.00 | 0.25 |
| UIL.21.13545 | ALMARAI LABAN UP | 2.71 | 4.27 | 1.15 | 0.81 | 3.99 | 0.316 | 5.00 | 7.00 | 2.00 | 1.00 | 7.00 | 0.621 | 3.00 | 7.00 | 5.00 | 9.00 | 0.50 | 3.50 | 0.20 | 1.80 | 5.00 | 9.00 | 0.50 | 0.75 |
| UIL.21.13548 | ALMARAI STRAWBERRY LABAN | 3.52 | 15.40 | 1.36 | 0.91 | 15.29 | 0.056 | 11.00 | 51.00 | 4.00 | 3.00 | 51.00 | 0.181 | 8.80 | 13.20 | 43.00 | 59.00 | 2.50 | 5.50 | 2.20 | 3.80 | 43.00 | 59.00 | 0.03 | 0.33 |
| UIL.21.13546 | AlRawabi Up:Laban Drink | 2.15 | 3.23 | 1.79 | 1.20 | 3.04 | 0.000 | 1.97 | 2.76 | 1.63 | 0.77 | 2.76 | 0.000 | 0.00 | 3.97 | 0.76 | 4.76 | 0.13 | 3.13 | 0.00 | 1.57 | 0.76 | 4.76 | 0.00 | 0.00 |
| UIL.21.17404 | BALADE FARMS AYRAN ORIGINAL LABAN | 1.65 | 3.40 | 1.27 | 1.02 | 0.00 | 0.375 | 1.60 | 3.27 | 1.18 |  |  | 0.370 | 0.00 | 3.60 | 1.27 | 5.27 | 0.00 | 2.68 |  |  |  |  | 0.22 | 0.52 |
| UIL.21.14131 | Cream (Luna) | 2.03 | 3.97 | 21.71 | 16.71 | 3.10 | 0.000 | 3.00 | 3.00 | 21.00 | 16.57 | 2.90 | 0.000 | 1.00 | 5.00 | 1.00 | 5.00 | 16.80 | 25.20 | 13.26 | 19.88 | 0.90 | 4.90 | 0.00 | 0.00 |
| UIL.21.14553 | cream (Puck) | 2.65 | 2.88 | 24.51 | 11.62 | 0.00 | 0.003 | 2.90 | 3.50 | 23.00 | 11.00 | 3.40 | 0.049 | 0.90 | 4.90 | 1.50 | 5.50 | 18.40 | 27.60 | 8.80 | 13.20 | 1.40 | 5.40 | 0.00 | 0.20 |
| UIL.21.13539 | Fresh laban (Alrawabi) | 3.28 | 4.62 | 3.27 | 2.29 | 3.97 | 0.000 | 3.00 | 4.60 | 3.20 |  |  |  | 1.00 | 5.00 | 2.60 | 6.60 | 1.70 | 4.70 |  |  |  |  |  |  |
| UIL.21.13594 | Fresh Labnah:Full Fat Mazoon | 6.54 | 7.16 | 11.13 | 7.82 | 6.63 | 0.214 | 6.00 | 8.00 | 11.00 | 8.30 | 7.20 | 0.200 | 4.00 | 8.00 | 6.00 | 10.00 | 8.80 | 13.20 | 6.64 | 9.96 | 5.20 | 9.20 | 0.05 | 0.35 |
| UIL.21.13592 | Fresh Labnah; Full Fat Al-Marai | 5.91 | 8.85 | 12.85 | 8.82 | 7.33 | 0.224 | 3.00 | 4.00 | 7.00 | 5.00 | 4.00 | 0.110 | 1.00 | 5.00 | 2.00 | 6.00 | 5.50 | 8.50 | 4.00 | 6.00 | 2.00 | 6.00 | 0.00 | 0.26 |
| UIL.21.13558 | Fresh Yougurt Full Fat: Al-Marai | 4.23 | 5.75 | 3.61 | 2.57 | 5.62 | 0.071 | 7.00 | 11.00 | 6.00 | 3.00 | 11.00 | 0.115 | 5.00 | 9.00 | 8.80 | 13.20 | 4.50 | 7.50 | 2.20 | 3.80 | 8.80 | 13.20 | 0.00 | 0.27 |
| UIL.21.13556 | Fresh Yougurt Full Fat: Al-Safwah | 3.56 | 5.82 | 3.23 | 2.01 | 4.78 | 0.072 | 3.20 | 8.70 | 2.10 |  |  | 0.065 | 1.20 | 5.20 | 6.70 | 10.70 | 0.60 | 3.60 |  |  |  |  | 0.00 | 0.22 |
| **id_lab** | **Name of Product & Brand** | **Amounts per 100 g/ml  from Laboratory analyses** | | | | | | **Amounts per 100 g/ml  from Labelling** | | | | | | **Tolerances for the nutrition declaration on food products** | | | | | | | | | | | |
| **Prot (g)** | | **Carb (g)** | | **TF (g)** | | **SFA (g)** | | **Sugars (g)** | | **Na (g)** | |
| **Prot1 (g)** | **Carb2 (g)** | **TF3 (g)** | **SFA4 (g)** | **Sugars  (g)** | **Na5 (g)** | **Prot (g)** | **Carb (g)** | **TF (g)** | **SFA (g)** | **Sugars  (g)** | **Na  (g)** | **Low** | **High** | **Low** | **High** | **Low** | **High** | **Low** | **High** | **Low** | **High** | **Low** | **High** |
| UIL.21.13549 | Laban drink (Unikai) | 3.19 | 3.29 | 0.74 | 0.48 | 3.02 | 1.876 | 2.50 | 3.50 | 0.70 |  |  |  | 0.50 | 4.50 | 1.50 | 5.50 | 0.00 | 2.20 |  |  |  |  |  |  |
| UIL.21.14179 | Laban drinks (Alkhamayil) | 1.94 | 4.22 | 0.58 | 0.37 | 0.89 | 0.000 | 0.03 | 0.03 | 0.01 |  |  | 0.003 | 0.00 | 2.03 | 0.00 | 2.03 | 0.00 | 1.51 |  |  |  |  | 0.00 | 0.15 |
| UIL.21.13543 | Laban fresh full creeam (Asafwah) | 3.31 | 5.10 | 3.31 | 2.37 | 4.07 | 0.069 | 3.30 | 4.50 | 3.10 | 2.20 | 4.50 | 0.064 | 1.30 | 5.30 | 2.50 | 6.50 | 1.60 | 4.60 | 1.40 | 3.00 | 2.50 | 6.50 | 0.00 | 0.21 |
| UIL.21.13541 | Laban up (Alsafwa) | 2.60 | 3.96 | 1.55 | 1.04 | 3.89 | 0.341 | 2.40 | 3.80 | 1.40 | 0.95 | 3.80 | 0.333 | 0.40 | 4.40 | 1.80 | 5.80 | 0.00 | 2.90 | 0.15 | 1.75 | 1.80 | 5.80 | 0.18 | 0.48 |
| UIL.21.13593 | Labneh Turkish Reciepe: Puck | 8.41 | 6.92 | 14.21 | 9.82 | 6.43 | 0.312 | 8.00 | 8.00 | 14.00 | 10.00 | 4.00 | 0.298 | 6.00 | 10.00 | 6.00 | 10.00 | 11.20 | 16.80 | 8.00 | 12.00 | 2.00 | 6.00 | 0.15 | 0.45 |
| UIL.21.13542 | MAZOON FRESH LABAN FULL FAT | 4.09 | 4.64 | 3.30 | 2.22 | 4.48 | 0.052 | 3.80 | 4.40 | 3.00 | 1.70 | 4.40 | 0.050 | 1.80 | 5.80 | 2.40 | 6.40 | 1.50 | 4.50 | 0.90 | 2.50 | 2.40 | 6.40 | 0.00 | 0.20 |
| UIL.21.13555 | MAZOON FRESH YOGHURT FULL FAT | 3.41 | 6.38 | 3.21 | 2.29 | 5.04 | 0.058 | 3.80 | 5.70 | 3.00 | 1.70 | 5.70 | 0.050 | 1.80 | 5.80 | 3.70 | 7.70 | 1.50 | 4.50 | 0.90 | 2.50 | 3.70 | 7.70 | 0.00 | 0.20 |
| UIL.21.13540 | MAZOON LABAN UP | 1.92 | 3.70 | 0.89 | 0.60 | 3.70 | 0.345 | 1.60 | 2.20 | 0.80 | 0.60 | 0.00 | 0.340 | 0.00 | 3.60 | 0.20 | 4.20 | 0.00 | 2.30 | 0.00 | 1.40 | 0.00 | 0.00 | 0.19 | 0.49 |
| UIL.21.14180 | MAZOON SAMBHARAM SPICY LABAN DRINK | 1.94 | 3.33 | 0.85 | 0.54 | 1.68 | 0.355 | 1.60 | 2.20 | 0.80 | 0.60 | 0.00 | 0.340 | 0.00 | 3.60 | 0.20 | 4.20 | 0.00 | 2.30 | 0.00 | 1.40 | 0.00 | 0.00 | 0.19 | 0.49 |
| UIL.21.13547 | MAZOON STRAWBERRY LABAN | 3.28 | 14.37 | 3.49 | 2.30 | 14.27 | 0.054 | 3.00 | 14.00 | 3.00 | 2.20 | 14.00 | 0.050 | 1.00 | 5.00 | 11.20 | 16.80 | 1.50 | 4.50 | 1.40 | 3.00 | 11.20 | 16.80 | 0.00 | 0.20 |
| UIL.21.13830 | Nestle cream | 3.09 | 4.90 | 23.44 | 13.40 | 0.00 | 0.000 | 2.60 |  | 23.10 | 15.30 |  |  | 0.60 | 4.60 |  |  | 18.48 | 27.72 | 12.24 | 18.36 |  |  |  |  |
| UIL.21.13557 | Yoghurt:Full Cream UNIKAI | 3.52 | 4.83 | 3.19 | 2.41 | 4.41 | 0.083 | 3.40 | 5.10 | 3.00 |  |  | 0.000 | 1.40 | 5.40 | 3.10 | 7.10 | 1.50 | 4.50 |  |  |  |  | 0.00 | 0.00 |
| UIL.21.13559 | Youghurt;Full Cream AlRawabi | 4.31 | 5.44 | 3.31 | 2.37 | 4.85 | 0.086 | 4.20 | 6.40 | 3.20 |  |  |  | 2.20 | 6.20 | 4.40 | 8.40 | 1.70 | 4.70 |  |  |  |  |  |  |
| UIL.21.13840 | ALMARAI BURGER SLICE CHEESE | 15.20 | 5.75 | 25.30 | 15.15 | 0.00 | 1.378 | 3.00 | 1.00 | 5.00 | 3.00 | 0.00 | 0.261 | 1.00 | 5.00 | 0.00 | 3.00 | 3.50 | 6.50 | 2.20 | 3.80 | 0.00 | 0.00 | 0.11 | 0.41 |
| UIL.21.13845 | ALMARAI CREAM CHEESE | 5.20 | 4.27 | 34.10 | 25.13 | 0.00 | 0.745 | 1.60 | 1.00 | 10.00 | 6.00 | 0.70 | 0.216 | 0.00 | 3.60 | 0.00 | 3.00 | 8.00 | 12.00 | 4.80 | 7.20 | 0.00 | 2.70 | 0.07 | 0.37 |
| UIL.21.13844 | ALMARAI CREAM CHEESE CHEDDAR | 10.23 | 4.53 | 30.87 | 15.50 | 0.00 | 1.152 | 3.00 | 1.00 | 9.00 | 6.00 | 1.00 | 0.341 | 1.00 | 5.00 | 0.00 | 3.00 | 7.50 | 10.50 | 4.80 | 7.20 | 0.00 | 3.00 | 0.19 | 0.49 |
| UIL.21.14572 | Chedder cheese (Almarai) | 17.90 | 0.00 | 24.97 | 16.77 | 0.00 | 1.899 | 5.00 | 0.00 | 7.00 | 5.00 | 0.00 | 0.564 | 3.00 | 7.00 | 0.00 | 0.00 | 5.50 | 8.50 | 4.00 | 6.00 | 0.00 | 0.00 | 0.45 | 0.68 |
| UIL.21.14571 | Chedder cheese (Kraft) | 13.56 | 5.64 | 25.56 | 17.84 | 0.00 | 1.800 | 16.00 | 2.40 | 24.00 | 15.00 | 0.20 | 1.728 | 12.80 | 19.20 | 0.40 | 4.40 | 19.20 | 28.80 | 12.00 | 18.00 | 0.00 | 2.20 | 1.38 | 2.07 |
| UIL.21.13837 | cheese triangles Al Maraai | 10.37 | 3.50 | 27.30 | 17.87 | 0.00 | 0.952 | 3.00 | 1.00 | 8.00 | 4.00 | 0.00 | 0.274 | 1.00 | 5.00 | 0.00 | 3.00 | 6.50 | 9.50 | 3.20 | 4.80 | 0.00 | 0.00 | 0.12 | 0.42 |
| UIL.21.13838 | cheese triangles Puck | 8.47 | 5.83 | 25.52 | 12.95 | 0.00 | 1.099 | 7.20 | 5.20 | 25.00 | 13.00 | 0.10 | 1.018 | 5.20 | 9.20 | 3.20 | 7.20 | 20.00 | 30.00 | 10.40 | 15.60 | 0.00 | 2.10 | 0.81 | 1.22 |
| UIL.21.13835 | Haloumi Pinar | 24.32 | 3.95 | 25.87 | 14.12 | 0.00 | 1.896 | 24.00 | 2.00 | 25.00 | 14.00 | 1.90 | 1.800 | 19.20 | 28.80 | 0.00 | 4.00 | 20.00 | 30.00 | 11.20 | 16.80 | 0.00 | 3.90 | 1.44 | 2.16 |
| UIL.21.13834 | Haloumi Cheese Al-Marai | 23.87 | 3.53 | 27.10 | 24.20 | 0.00 | 1.254 | 7.00 | 1.00 | 8.00 | 5.00 | 0.00 | 0.360 | 5.00 | 9.00 | 0.00 | 3.00 | 6.50 | 9.50 | 4.00 | 6.00 | 0.00 | 0.00 | 0.21 | 0.51 |
| UIL.21.13848 | KRAFT CHEDDAR CHEESE SPREAD ORIGINAL | 8.34 | 4.21 | 28.21 | 19.12 | 0.00 | 1.216 | 7.80 | 3.00 | 27.00 | 19.00 | 2.80 | 1.116 | 5.80 | 9.80 | 1.00 | 5.00 | 21.60 | 32.40 | 15.20 | 22.80 | 0.80 | 4.80 | 0.89 | 1.34 |
| UIL.21.13839 | KRAFT SLICE CHEESE ORIGINAL | 15.14 | 7.43 | 21.56 | 13.17 | 0.00 | 1.356 | 14.90 | 7.00 | 20.60 | 13.40 | 3.90 | 1.298 | 11.92 | 17.88 | 5.00 | 9.00 | 16.48 | 24.72 | 10.72 | 16.08 | 1.90 | 5.90 | 1.04 | 1.56 |
| UIL.21.13843 | MAZOON SPREAD CHEESE | 6.72 | 3.08 | 33.48 | 24.12 | 0.00 | 0.396 | 6.00 | 2.00 | 33.00 | 22.40 | 0.00 | 0.385 | 4.00 | 8.00 | 0.00 | 4.00 | 26.40 | 39.60 | 17.92 | 26.88 | 0.00 | 0.00 | 0.24 | 0.54 |
| UIL.21.13842 | MAZOON SPREAD CHEESE CHEDDAR | 7.12 | 2.36 | 33.52 | 23.82 | 0.00 | 0.395 | 6.00 | 2.00 | 33.00 | 22.40 | 0.00 | 0.385 | 4.00 | 8.00 | 0.00 | 4.00 | 26.40 | 39.60 | 17.92 | 26.88 | 0.00 | 0.00 | 0.24 | 0.54 |
| UIL.21.14554 | Pinar processed cream cheese spread | 6.66 | 1.61 | 31.02 | 27.80 | 0.00 | 0.709 | 8.40 | 1.70 | 30.00 | 15.80 | 1.70 | 0.700 | 6.40 | 10.40 | 0.00 | 3.70 | 24.00 | 36.00 | 12.64 | 18.96 | 0.00 | 3.70 | 0.56 | 0.84 |
| UIL.21.13847 | PUCK CREAM CHEESE | 8.65 | 2.49 | 31.85 | 20.97 | 0.00 | 0.836 | 8.70 | 1.90 | 31.00 | 19.00 | 1.90 | 0.824 | 6.70 | 10.70 | 0.00 | 3.90 | 24.80 | 37.20 | 15.20 | 22.80 | 0.00 | 3.90 | 0.66 | 0.99 |
| UIL.21.13846 | PUCK CREAM CHEESE CHEDDAR | 8.52 | 2.62 | 32.01 | 19.20 | 0.00 | 0.796 | 8.70 | 1.90 | 31.00 | 19.00 | 1.90 | 0.786 | 6.70 | 10.70 | 0.00 | 3.90 | 24.80 | 37.20 | 15.20 | 22.80 | 0.00 | 3.90 | 0.63 | 0.94 |
| UIL.21.13841 | PUCK SLICE CHEESE ORIGINAL | 14.81 | 5.68 | 27.66 | 14.04 | 0.00 | 0.609 | 14.00 | 5.50 | 27.00 | 14.00 | 5.50 | 0.600 | 11.20 | 16.80 | 3.50 | 7.50 | 21.60 | 32.40 | 11.20 | 16.80 | 3.50 | 7.50 | 0.48 | 0.72 |
| UIL.21.13836 | Triangle cheese Abu Alwald | 8.22 | 8.11 | 21.02 | 11.92 | 0.00 | 0.745 | 7.50 | 7.00 | 20.50 | 12.00 | 5.50 | 0.720 | 5.50 | 9.50 | 5.00 | 9.00 | 16.40 | 24.60 | 9.60 | 14.40 | 3.50 | 7.50 | 0.58 | 0.86 |
| UIL.21.13456 | Britannia toastea wheat Rusk | 9.61 | 77.48 | 9.74 | 4.35 | 26.71 | 0.223 | 2.00 | 25.00 | 3.00 | 2.00 | 8.50 | 0.065 | 0.00 | 4.00 | 20.00 | 30.00 | 1.50 | 4.50 | 1.20 | 2.80 | 6.50 | 10.50 | 0.00 | 0.22 |
| UIL.21.13455 | Tiffany whole wheat Rusks | 10.13 | 76.93 | 8.49 | 3.80 | 23.11 | 0.225 | 10.00 | 70.00 | 8.40 | 4.00 | 23.20 | 0.219 | 8.00 | 12.00 | 62.00 | 78.00 | 6.90 | 9.90 | 3.20 | 4.80 | 18.56 | 27.84 | 0.07 | 0.37 |
| UIL.21.13429 | INDOMIE FRIED NOODLES | 8.54 | 62.06 | 20.92 | 11.35 | 8.24 | 1.364 | 7.20 | 61.90 | 20.90 | 16.30 | 8.30 | 1.050 | 5.20 | 9.20 | 53.90 | 69.90 | 16.72 | 25.08 | 13.04 | 19.56 | 6.30 | 10.30 | 0.84 | 1.26 |
| UIL.21.14202 | Al-Islami Ground Beef | 11.74 | 2.34 | 9.25 | 4.16 | 1.38 | 0.421 | 11.90 | 1.90 | 8.60 |  |  |  | 9.52 | 14.28 | 0.00 | 3.90 | 7.10 | 10.10 |  |  |  |  |  |  |
| UIL.21.14203 | Al-Kabeer Jumbo Hotdogs | 17.12 | 4.25 | 7.69 | 4.31 | 0.00 | 0.540 | 17.00 | 3.00 | 7.00 | 3.00 | 0.70 | 0.530 | 13.60 | 20.40 | 1.00 | 5.00 | 5.50 | 8.50 | 2.20 | 3.80 | 0.00 | 2.70 | 0.42 | 0.64 |
| UIL.21.14194 | Al-Safa Breaded Chiocken Finger | 18.80 | 19.68 | 8.31 | 2.56 | 0.00 | 0.486 | 15.50 | 20.20 | 7.90 | 2.30 | 1.50 | 0.472 | 12.40 | 18.60 | 16.16 | 24.24 | 6.40 | 9.40 | 1.50 | 3.10 | 0.00 | 3.50 | 0.32 | 0.62 |
| UIL.21.14196 | Al-Safa Chicken Burger | 16.86 | 3.94 | 10.41 | 3.01 | 0.00 | 0.395 | 16.00 | 4.60 | 9.40 | 2.80 | 0.80 | 0.383 | 12.80 | 19.20 | 2.60 | 6.60 | 7.90 | 10.90 | 2.00 | 3.60 | 0.00 | 2.80 | 0.23 | 0.53 |
| **id_lab** | **Name of Product & Brand** | **Amounts per 100 g/ml  from Laboratory analyses** | | | | | | **Amounts per 100 g/ml  from Labelling** | | | | | | **Tolerances for the nutrition declaration on food products** | | | | | | | | | | | |
| **Prot (g)** | | **Carb (g)** | | **TF (g)** | | **SFA (g)** | | **Sugars (g)** | | **Na (g)** | |
| **Prot1 (g)** | **Carb2 (g)** | **TF3 (g)** | **SFA4 (g)** | **Sugars  (g)** | **Na5 (g)** | **Prot (g)** | **Carb (g)** | **TF (g)** | **SFA (g)** | **Sugars  (g)** | **Na  (g)** | **Low** | **High** | **Low** | **High** | **Low** | **High** | **Low** | **High** | **Low** | **High** | **Low** | **High** |
| UIL.21.14205 | Al-Safa Chicken Franks | 12.29 | 5.85 | 14.88 | 8.06 | 0.00 | 1.301 | 4.00 | 2.00 | 5.00 |  |  | 0.440 | 2.00 | 6.00 | 0.00 | 4.00 | 3.50 | 6.50 |  |  |  |  | 0.29 | 0.59 |
| UIL.21.14204 | Americana Beef Hotdog | 15.05 | 2.11 | 12.56 | 5.27 | 0.00 | 0.603 | 14.00 | 2.00 | 12.00 | 4.50 | 1.00 | 0.600 | 11.20 | 16.80 | 0.00 | 4.00 | 9.60 | 14.40 | 3.60 | 5.40 | 0.00 | 3.00 | 0.48 | 0.72 |
| UIL.21.14200 | Beef burger (Taybat) | 19.11 | 6.40 | 13.52 | 6.99 | 0.00 | 0.621 | 19.20 | 7.70 | 12.90 | 6.00 | 1.40 | 0.619 | 15.36 | 23.04 | 5.70 | 9.70 | 10.32 | 15.48 | 4.80 | 7.20 | 0.00 | 3.40 | 0.50 | 0.74 |
| UIL.21.14199 | Beef Burger Sadia | 14.21 | 6.70 | 20.57 | 10.32 | 0.00 | 0.456 | 14.00 | 6.50 | 20.00 | 11.50 | 0.55 |  | 11.20 | 16.80 | 4.50 | 8.50 | 16.00 | 24.00 | 9.20 | 13.80 | 0.00 | 2.55 |  |  |
| UIL.21.14201 | corned Beef (Taybat) | 12.50 | 12.78 | 8.42 | 4.14 | 0.54 | 0.211 | 6.00 | 6.00 | 4.00 |  |  |  | 4.00 | 8.00 | 4.00 | 8.00 | 2.50 | 5.50 |  |  |  |  |  |  |
| UIL.21.14573 | FAMILY CORNED BEEF | 24.87 | 5.10 | 10.59 | 6.54 | 4.02 | 0.426 |  |  |  |  |  |  |  |  |  |  |  |  |  |  |  |  |  |  |
| UIL.21.14198 | Sadia Chicken Burger | 14.21 | 6.78 | 15.24 | 5.93 | 0.00 | 0.595 | 13.50 | 7.50 | 14.50 | 7.50 | 0.95 | 0.665 | 10.80 | 16.20 | 5.50 | 9.50 | 11.60 | 17.40 | 6.00 | 9.00 | 0.00 | 2.95 | 0.53 | 0.80 |
| UIL.21.14206 | Sadia Chicken Franks | 12.94 | 2.70 | 15.65 | 6.77 | 0.00 | 0.461 | 12.00 | 2.37 | 15.00 | 5.40 | 0.70 | 0.460 | 9.60 | 14.40 | 0.37 | 4.37 | 12.00 | 18.00 | 4.32 | 6.48 | 0.00 | 2.70 | 0.31 | 0.61 |
| UIL.21.14195 | Sadia Chicken Nuggets Crispy | 11.89 | 20.87 | 10.35 | 3.21 | 0.00 | 0.416 | 12.00 | 19.00 | 10.00 | 5.00 | 0.35 | 0.405 | 9.60 | 14.40 | 15.20 | 22.80 | 8.00 | 12.00 | 4.00 | 6.00 | 0.00 | 2.35 | 0.26 | 0.56 |
| UIL.21.13295 | LIGHT CHUNKS TUNA CALIFORNIA GARDEN IN WATER | 23.69 | 0.95 | 1.07 | 0.80 | 0.84 | 0.215 | 23.90 | 0.68 | 1.16 |  |  | 0.208 | 19.12 | 28.68 | 0.00 | 2.68 | 0.00 | 2.66 |  |  |  |  | 0.06 | 0.36 |
| UIL.21.13291 | SKIPJACK TUNA ALALALI IN SUN FLOWER OIL | 23.12 | 3.96 | 11.02 | 1.46 | 0.80 | 0.480 | 23.00 | 0.00 | 10.60 | 0.56 | 0.00 | 0.472 | 18.40 | 27.60 | 0.00 | 0.00 | 8.48 | 12.72 | 0.00 | 1.36 | 0.00 | 0.00 | 0.32 | 0.62 |
| UIL.21.13294 | SKIPJACK TUNA CALIFORNIA GARDEN IN SUN FLOWER OIL | 25.06 | 1.99 | 2.98 | 0.36 | 0.89 | 0.303 | 24.80 | 1.05 | 2.67 |  |  | 0.282 | 19.84 | 29.76 | 0.00 | 3.05 | 1.17 | 4.17 |  |  |  |  | 0.13 | 0.43 |
| UIL.21.13292 | TUNA ALALALI IN WATER | 23.19 | 3.29 | 0.01 | 0.00 | 0.89 | 0.480 | 23.00 | 0.00 | 0.00 | 0.00 | 0.00 | 0.472 | 18.40 | 27.60 | 0.00 | 0.00 | 0.00 | 0.00 | 0.00 | 0.00 | 0.00 | 0.00 | 0.32 | 0.62 |
| UIL.21.13434 | WHITE TUNA MEAT IN BRINE | 25.57 | 1.97 | 0.61 | 0.46 | 0.10 | 0.381 | 23.00 | 0.90 | 0.90 | 0.40 | 0.00 | 0.400 | 18.40 | 27.60 | 0.00 | 2.90 | 0.00 | 2.40 | 0.00 | 1.20 | 0.00 | 0.00 | 0.25 | 0.55 |
| UIL.21.13293 | WHITE TUNA MEAT IN SUN FLOWER OIL DELMONTE | 24.75 | 2.96 | 5.58 | 0.80 | 0.36 | 0.425 | 24.00 | 2.00 | 4.60 | 0.70 | 0.00 | 0.400 | 19.20 | 28.80 | 0.00 | 4.00 | 3.10 | 6.10 | 0.00 | 1.50 | 0.00 | 0.00 | 0.25 | 0.55 |
| UIL.21.13282 | BAKED BEANS ALMAZRAA | 4.40 | 25.97 | 0.63 | 0.16 | 6.12 | 0.392 | 6.00 | 25.00 | 1.00 | 0.00 | 8.00 | 0.500 | 4.00 | 8.00 | 20.00 | 30.00 | 0.00 | 2.50 | 0.00 | 0.00 | 6.00 | 10.00 | 0.40 | 0.60 |
| UIL.21.13278 | BAKED BEANS CALIFORNIA GARDEN | 5.20 | 12.42 | 1.20 | 0.38 | 10.40 | 0.313 | 7.00 | 20.00 | 1.50 | 0.50 | 14.00 | 0.390 | 5.00 | 9.00 | 16.00 | 24.00 | 0.00 | 3.00 | 0.00 | 1.30 | 11.20 | 16.80 | 0.24 | 0.54 |
| UIL.21.13289 | BOILDCHICK PEAS MARA | 4.11 | 11.37 | 1.31 | 0.26 | 0.74 | 0.154 | 3.80 | 9.00 | 1.50 | 0.20 | 0.00 | 0.152 | 1.80 | 5.80 | 7.00 | 11.00 | 0.00 | 3.00 | 0.00 | 1.00 | 0.00 | 0.00 | 0.00 | 0.30 |
| UIL.21.13286 | CHICK PEAS ALMAZRAA | 6.04 | 16.14 | 0.61 | 0.11 | 0.81 | 0.294 | 8.00 | 19.00 | 1.00 | 0.00 | 1.00 | 0.370 | 6.00 | 10.00 | 15.20 | 22.80 | 0.00 | 2.50 | 0.00 | 0.00 | 0.00 | 3.00 | 0.22 | 0.52 |
| UIL.21.13281 | CHICK PEAS CALIFORNIA GARDEN | 7.12 | 19.98 | 0.64 | 0.13 | 0.84 | 0.267 | 10.00 | 17.00 | 1.00 | 0.00 | 2.00 | 0.340 | 8.00 | 12.00 | 13.60 | 20.40 | 0.00 | 2.50 | 0.00 | 0.00 | 0.00 | 4.00 | 0.19 | 0.49 |
| UIL.21.13284 | CHICK PEAS LUNA | 4.71 | 16.44 | 1.60 | 0.74 | 0.76 | 0.346 | 5.00 | 21.30 | 1.90 | 0.80 | 0.60 | 0.300 | 3.00 | 7.00 | 17.04 | 25.56 | 0.40 | 3.40 | 0.00 | 1.60 | 0.00 | 2.60 | 0.15 | 0.45 |
| UIL.21.14397 | diamond strawberry jam | 0.39 | 66.47 | 0.31 | 0.27 | 63.84 | 0.015 | 0.40 | 65.00 | 0.30 |  |  |  | 0.00 | 2.40 | 57.00 | 73.00 | 0.00 | 1.80 |  |  |  |  |  |  |
| UIL.21.13283 | FOUL MEDAMAS ALMAZRAA | 5.18 | 15.11 | 0.01 | 0.00 | 0.77 | 0.434 | 7.00 | 18.00 | 0.00 | 0.00 | 2.00 | 0.550 | 5.00 | 9.00 | 14.40 | 21.60 | 0.00 | 0.00 | 0.00 | 0.00 | 0.00 | 4.00 | 0.44 | 0.66 |
| UIL.21.14557 | Foul Medammas (American Garden) | 6.83 | 16.53 | 0.01 | 0.00 | 1.22 | 0.341 | 8.00 | 22.00 | 0.00 | 0.00 | 1.00 | 0.430 | 6.00 | 10.00 | 17.60 | 26.40 | 0.00 | 0.00 | 0.00 | 0.00 | 0.00 | 3.00 | 0.28 | 0.58 |
| UIL.21.13276 | GREEN GIANT SWEET CORN | 2.01 | 15.16 | 1.63 | 0.38 | 7.48 | 0.204 | 1.90 | 9.40 | 1.40 | 0.30 | 5.90 | 0.128 | 0.00 | 3.90 | 7.40 | 11.40 | 0.00 | 2.90 | 0.00 | 1.10 | 3.90 | 7.90 | 0.00 | 0.28 |
| UIL.21.13285 | GREEN PEAS LUNA | 4.27 | 16.41 | 0.42 | 0.12 | 0.61 | 0.237 | 4.50 | 16.00 | 0.50 | 0.25 | 0.40 | 0.200 | 2.50 | 6.50 | 12.80 | 19.20 | 0.00 | 2.00 | 0.00 | 1.05 | 0.00 | 2.40 | 0.05 | 0.35 |
| UIL.21.14555 | LA MING beans in tomato sauce | 7.64 | 88.34 | 0.98 | 0.23 | 2.40 | 0.000 |  |  |  |  |  |  |  |  |  |  |  |  |  |  |  |  |  |  |
| UIL.21.14556 | LUNA baked beans in tomato sauce | 7.07 | 14.44 | 0.30 | 0.19 | 3.96 | 0.320 | 5.86 | 16.00 | 0.36 | 0.20 | 3.90 | 0.300 | 3.86 | 7.86 | 12.80 | 19.20 | 0.00 | 1.86 | 0.00 | 1.00 | 1.90 | 5.90 | 0.15 | 0.45 |
| UIL.21.14558 | LUNAFOUL MEDAMES extra grade fava beans | 7.30 | 16.68 | 0.41 | 0.21 | 1.17 | 0.330 | 6.50 | 16.80 | 0.20 | 0.08 | 0.60 | 0.300 | 4.50 | 8.50 | 13.44 | 20.16 | 0.00 | 1.70 | 0.00 | 0.88 | 0.00 | 2.60 | 0.15 | 0.45 |
| UIL.21.14406 | Mango pickle / Aeroplane | 1.46 | 9.62 | 4.08 | 1.23 | 0.10 | 5.040 | 1.40 | 9.60 | 3.70 | 0.90 | 0.00 | 5.600 | 0.00 | 3.40 | 7.60 | 11.60 | 2.20 | 5.20 | 0.10 | 1.70 | 0.00 | 0.00 | 4.48 | 6.72 |
| UIL.21.14403 | Mango pickles in oil / Ahmed | 3.05 | 9.35 | 20.80 | 2.30 | 0.50 | 3.016 | 0.40 | 2.00 | 4.00 | 0.60 | 0.00 | 0.600 | 0.00 | 2.40 | 0.00 | 4.00 | 2.50 | 5.50 | 0.00 | 1.40 | 0.00 | 0.00 | 0.48 | 0.72 |
| UIL.21.14405 | Mango thokku pickle in oil / Priya | 4.07 | 28.04 | 4.21 | 1.03 | 22.40 | 4.471 |  |  |  |  |  |  |  |  |  |  |  |  |  |  |  |  |  |  |
| UIL.21.14559 | Peas processed | 3.99 | 17.19 | 0.01 | 0.00 | 2.46 | 0.215 | 6.00 | 21.00 | 0.00 | 0.00 | 2.00 | 0.270 | 4.00 | 8.00 | 16.80 | 25.20 | 0.00 | 0.00 | 0.00 | 0.00 | 0.00 | 4.00 | 0.12 | 0.42 |
| UIL.21.13277 | PLAIN MEDAMMES CALIFORNIA GARDEN | 6.02 | 17.51 | 0.01 | 0.00 | 0.93 | 0.343 | 8.00 | 22.00 | 0.00 | 0.00 | 1.00 | 0.430 | 6.00 | 10.00 | 17.60 | 26.40 | 0.00 | 0.00 | 0.00 | 0.00 | 0.00 | 3.00 | 0.28 | 0.58 |
| UIL.21.13287 | PROCESSED PEAS ALMAZRAA | 4.48 | 15.42 | 0.01 | 0.00 | 1.64 | 0.326 | 6.00 | 20.00 | 0.00 | 0.00 | 2.00 | 0.400 | 4.00 | 8.00 | 16.00 | 24.00 | 0.00 | 0.00 | 0.00 | 0.00 | 0.00 | 4.00 | 0.25 | 0.55 |
| UIL.21.13279 | PROCESSED PEAS CALIFORNIA GARDEN | 4.59 | 16.37 | 0.01 | 0.15 | 1.64 | 0.329 | 6.00 | 20.00 | 0.00 | 0.00 | 2.00 | 0.400 | 4.00 | 8.00 | 16.00 | 24.00 | 0.00 | 0.00 | 0.00 | 0.00 | 0.00 | 4.00 | 0.25 | 0.55 |
| UIL.21.13290 | SWEET CORN AMERICAN GARDEN | 2.50 | 17.23 | 1.29 | 0.29 | 6.41 | 0.179 | 3.00 | 20.00 | 1.50 | 0.00 | 8.00 | 0.210 | 1.00 | 5.00 | 16.00 | 24.00 | 0.00 | 3.00 | 0.00 | 0.00 | 6.00 | 10.00 | 0.06 | 0.36 |
| **id_lab** | **Name of Product & Brand** | **Amounts per 100 g/ml  from Laboratory analyses** | | | | | | **Amounts per 100 g/ml  from Labelling** | | | | | | **Tolerances for the nutrition declaration on food products** | | | | | | | | | | | |
| **Prot (g)** | | **Carb (g)** | | **TF (g)** | | **SFA (g)** | | **Sugars (g)** | | **Na (g)** | |
| **Prot1 (g)** | **Carb2 (g)** | **TF3 (g)** | **SFA4 (g)** | **Sugars  (g)** | **Na5 (g)** | **Prot (g)** | **Carb (g)** | **TF (g)** | **SFA (g)** | **Sugars  (g)** | **Na  (g)** | **Low** | **High** | **Low** | **High** | **Low** | **High** | **Low** | **High** | **Low** | **High** | **Low** | **High** |
| UIL.21.13280 | SWEET CORN CALIFORNIA GARDEN | 2.15 | 19.98 | 1.08 | 0.28 | 3.08 | 0.133 | 3.00 | 18.00 | 1.50 | 0.00 | 4.00 | 0.170 | 1.00 | 5.00 | 14.40 | 21.60 | 0.00 | 3.00 | 0.00 | 0.00 | 2.00 | 6.00 | 0.02 | 0.32 |
| UIL.21.13288 | SWEET CORN LIBBYS | 1.68 | 9.59 | 0.55 | 0.16 | 2.09 | 0.223 | 1.00 | 9.00 | 0.50 | 0.00 | 2.00 | 0.260 | 0.00 | 3.00 | 7.00 | 11.00 | 0.00 | 2.00 | 0.00 | 0.00 | 0.00 | 4.00 | 0.11 | 0.41 |
| UIL.21.14404 | Tomato paste / Alalali | 3.54 | 15.21 | 0.72 | 0.38 | 12.30 | 0.411 | 4.30 | 14.40 | 0.64 | 0.00 | 11.70 | 0.198 | 2.30 | 6.30 | 11.52 | 17.28 | 0.00 | 2.14 | 0.00 | 0.00 | 9.36 | 14.04 | 0.05 | 0.35 |
| UIL.21.14399 | Tomato paste / Almudhish | 5.15 | 16.84 | 1.02 | 0.39 | 10.40 | 0.000 | 4.64 | 17.40 | 0.80 |  | 11.00 | 0.300 | 2.64 | 6.64 | 13.92 | 20.88 | 0.00 | 2.30 |  |  | 8.80 | 13.20 | 0.15 | 0.45 |
| UIL.21.14400 | Tomato paste / Jumbo | 2.09 | 17.76 | 0.65 | 0.25 | 4.14 | 0.301 | 1.10 | 17.20 | 0.50 |  |  | 0.300 | 0.00 | 3.10 | 13.76 | 20.64 | 0.00 | 2.00 |  |  |  |  | 0.15 | 0.45 |
| UIL.21.14394 | american garden BBQ sauce original | 0.03 | 41.64 | 0.03 | 0.01 | 34.14 | 0.990 | 0.00 | 15.00 | 0.00 | 0.00 | 14.00 | 0.350 | 0.00 | 0.00 | 12.00 | 18.00 | 0.00 | 0.00 | 0.00 | 0.00 | 11.20 | 16.80 | 0.20 | 0.50 |
| UIL.21.14415 | Classic Mayonnaise / Mazola | 0.07 | 3.57 | 79.21 | 13.64 | 3.71 | 0.498 | 0.00 | 0.40 | 11.00 | 1.50 | 0.40 | 0.068 | 0.00 | 0.00 | 0.00 | 2.40 | 8.80 | 13.20 | 0.70 | 2.30 | 0.00 | 2.40 | 0.00 | 0.22 |
| UIL.21.14416 | creamy classic mayyonaise / Heinz | 0.07 | 12.14 | 35.85 | 7.32 | 3.46 | 0.807 | 0.10 | 12.40 | 35.00 | 5.60 | 2.70 | 0.800 | 0.00 | 2.10 | 9.92 | 14.88 | 28.00 | 42.00 | 4.48 | 6.72 | 0.70 | 4.70 | 0.64 | 0.96 |
| UIL.21.14393 | Delicio 1000 island | 0.86 | 9.64 | 36.93 | 6.64 | 14.29 | 1.040 | 0.10 | 1.40 | 5.00 | 1.00 | 1.20 | 0.142 | 0.00 | 2.10 | 0.00 | 3.40 | 3.50 | 6.50 | 0.20 | 1.80 | 0.00 | 3.20 | 0.00 | 0.29 |
| UIL.21.14392 | Delicio french dressing | 1.07 | 15.50 | 36.86 | 6.64 | 19.79 | 1.117 | 0.10 | 2.30 | 5.00 | 1.00 | 2.00 | 0.156 | 0.00 | 2.10 | 0.30 | 4.30 | 3.50 | 6.50 | 0.20 | 1.80 | 0.00 | 4.00 | 0.01 | 0.31 |
| UIL.21.13296 | Hayat Hot Sauce | 0.63 | 0.77 | 0.70 | 0.00 | 0.72 | 2.616 |  |  |  |  |  |  |  |  |  |  |  |  |  |  |  |  |  |  |
| UIL.21.14395 | Heinz classic BBQ smokey and rich | 0.85 | 33.77 | 0.35 | 0.15 | 28.68 | 0.496 | 0.90 | 34.00 | 0.20 | 0.10 | 29.00 | 0.480 | 0.00 | 2.90 | 27.20 | 40.80 | 0.00 | 1.70 | 0.00 | 0.90 | 23.20 | 34.80 | 0.33 | 0.63 |
| UIL.21.14402 | Hot Sauce / Excellnce | 0.33 | 10.62 | 0.01 | 0.00 | 9.79 | 2.290 |  |  |  |  |  |  |  |  |  |  |  |  |  |  |  |  |  |  |
| UIL.21.14417 | Hot sause / American garden | 0.60 | 2.00 | 0.20 | 0.04 | 2.00 | 2.790 | 0.00 | 0.00 | 0.00 | 0.00 | 0.00 | 0.140 | 0.00 | 0.00 | 0.00 | 0.00 | 0.00 | 0.00 | 0.00 | 0.00 | 0.00 | 0.00 | 0.00 | 0.29 |
| UIL.21.13297 | Jumbo Hot Sauce | 0.34 | 0.86 | 0.10 | 0.00 | 0.58 | 1.610 | 0.30 | 0.20 | 1.04 | 0.27 | 0.00 | 0.306 | 0.00 | 2.30 | 0.00 | 2.20 | 0.00 | 2.54 | 0.00 | 1.07 | 0.00 | 0.00 | 0.16 | 0.46 |
| UIL.21.14563 | Knor vegetable stock cubes | 0.29 | 0.44 | 0.00 | 0.00 | 0.00 | 0.443 | 0.10 | 0.40 | 0.50 | 0.30 | 0.20 | 0.442 | 0.00 | 2.10 | 0.00 | 2.40 | 0.00 | 2.00 | 0.00 | 1.10 | 0.00 | 2.20 | 0.29 | 0.59 |
| UIL.21.14562 | Knour beef flavoured stock | 0.25 | 0.52 | 0.00 | 0.00 | 0.00 | 0.461 | 0.10 | 0.40 | 0.40 | 0.30 | 0.10 | 0.460 | 0.00 | 2.10 | 0.00 | 2.40 | 0.00 | 1.90 | 0.00 | 1.10 | 0.00 | 2.10 | 0.31 | 0.61 |
| UIL.21.14561 | Knour CHICKEN stock | 0.31 | 0.37 | 0.00 | 0.00 | 0.00 | 0.539 | 0.20 | 0.30 | 0.50 | 0.40 | 0.00 | 0.531 | 0.00 | 2.20 | 0.00 | 2.30 | 0.00 | 2.00 | 0.00 | 1.20 | 0.00 | 0.00 | 0.42 | 0.64 |
| UIL.21.14564 | Maggi beef flavour | 0.00 | 12.94 | 0.00 | 0.00 | 0.00 | 19.900 | 6.90 | 12.00 | 20.80 | 13.20 | 3.70 | 18.630 | 4.90 | 8.90 | 9.60 | 14.40 | 16.64 | 24.96 | 10.56 | 15.84 | 1.70 | 5.70 | 14.90 | 22.36 |
| UIL.21.13430 | MAGGI CHICKEN STOCK | 5.16 | 14.51 | 21.89 | 12.87 | 8.23 | 18.220 | 5.00 | 13.00 | 21.80 | 14.40 | 8.20 | 19.100 | 3.00 | 7.00 | 10.40 | 15.60 | 17.44 | 26.16 | 11.52 | 17.28 | 6.20 | 10.20 | 15.28 | 22.92 |
| UIL.21.14565 | MAGGI CHICKEN STOCK LESS SALT | 0.00 | 29.10 | 0.00 | 0.00 | 0.00 | 14.780 | 5.10 | 29.70 | 26.00 | 14.80 | 10.90 | 13.800 | 3.10 | 7.10 | 23.76 | 35.64 | 20.80 | 31.20 | 11.84 | 17.76 | 8.72 | 13.08 | 11.04 | 16.56 |
| UIL.21.14407 | Pizza sauce olive& mushrooms / Alalali | 2.05 | 9.65 | 1.58 | 0.36 | 6.38 | 0.358 | 2.20 | 9.50 | 1.30 | 0.20 | 5.30 | 0.350 | 0.20 | 4.20 | 7.50 | 11.50 | 0.00 | 2.80 | 0.00 | 1.00 | 3.30 | 7.30 | 0.20 | 0.50 |
| UIL.21.14398 | Soy sauce classic / American garden | 0.60 | 2.00 | 0.20 | 0.04 | 2.00 | 2.853 | 0.00 | 2.00 | 0.00 | 0.00 | 1.00 | 0.108 | 0.00 | 0.00 | 0.00 | 4.00 | 0.00 | 0.00 | 0.00 | 0.00 | 0.00 | 3.00 | 0.00 | 0.26 |
| UIL.21.14401 | Tabasco hot sauce | 1.59 | 2.84 | 0.01 | 0.00 | 2.65 | 0.690 | 1.00 | 1.60 | 0.00 | 0.00 | 0.10 | 0.687 | 0.00 | 3.00 | 0.00 | 3.60 | 0.00 | 0.00 | 0.00 | 0.00 | 0.00 | 2.10 | 0.55 | 0.82 |
| UIL.21.14408 | Tomato ketchup / Hayat | 0.60 | 26.60 | 0.07 | 0.01 | 22.20 | 0.816 | 0.02 | 4.00 | 0.00 | 0.00 | 3.00 | 0.120 | 0.00 | 2.02 | 2.00 | 6.00 | 0.00 | 0.00 | 0.00 | 0.00 | 1.00 | 5.00 | 0.00 | 0.27 |
| UIL.21.14413 | Tomato ketchup / Heinz | 1.40 | 23.30 | 0.01 | 0.00 | 22.58 | 0.721 | 1.20 | 23.00 | 0.00 | 0.00 | 23.00 | 0.720 | 0.00 | 3.20 | 18.40 | 27.60 | 0.00 | 0.00 | 0.00 | 0.00 | 18.40 | 27.60 | 0.58 | 0.86 |
| UIL.21.14411 | Tomato Ketchup/ Jumbo | 0.99 | 29.35 | 0.31 | 0.19 | 26.94 | 0.164 | 1.04 | 29.27 | 0.28 | 0.20 | 26.88 | 0.162 | 0.00 | 3.04 | 23.42 | 35.12 | 0.00 | 1.78 | 0.00 | 1.00 | 21.50 | 32.26 | 0.01 | 0.31 |
| UIL.21.13828 | Al Deyafa fruit cordial | 0.00 | 64.33 | 0.00 | 0.00 | 60.59 | 0.015 | 0.00 | 63.50 | 0.03 | 0.00 | 60.50 | 0.014 | 0.00 | 0.00 | 55.50 | 71.50 | 0.00 | 1.53 | 0.00 | 0.00 | 52.50 | 68.50 | 0.00 | 0.16 |
| UIL.21.13850 | Al Deyafa orang flavour (powder) | 0.01 | 95.73 | 0.00 | 0.00 | 94.69 | 0.000 | 0.00 | 94.00 | 0.00 |  | 94.00 | 0.000 | 0.00 | 0.00 | 86.00 | 102.00 | 0.00 | 0.00 |  |  | 86.00 | 102.00 | 0.00 | 0.00 |
| UIL.21.14134 | Al Marai mango juice | 0.38 | 15.40 | 0.10 | 0.00 | 11.81 | 0.000 | 0.00 | 12.50 | 0.00 | 0.00 | 12.20 | 0.000 | 0.00 | 0.00 | 10.00 | 15.00 | 0.00 | 0.00 | 0.00 | 0.00 | 9.76 | 14.64 | 0.00 | 0.00 |
| UIL.21.14132 | Al rabie fruit cocktail nectar | 0.00 | 15.49 | 0.00 | 0.00 | 12.47 | 0.000 |  | 15.00 | 0.00 |  | 15.00 | 0.010 |  |  | 12.00 | 18.00 | 0.00 | 0.00 |  |  | 12.00 | 18.00 | 0.00 | 0.16 |
| UIL.21.14133 | al rawabi apple juice | 0.26 | 10.35 | 0.10 | 0.02 | 9.15 | 0.000 | 0.11 | 10.85 | 0.11 | 0.02 | 10.37 | 0.040 | 0.00 | 2.11 | 8.68 | 13.02 | 0.00 | 1.61 | 0.00 | 0.82 | 8.30 | 12.44 | 0.00 | 0.19 |
| UIL.21.14138 | AL RAWABI RED GRAPE JUICE | 0.25 | 15.18 | 0.10 | 0.00 | 13.96 | 0.000 | 0.23 | 15.40 | 0.12 | 0.00 | 15.40 | 0.004 | 0.00 | 2.23 | 12.32 | 18.48 | 0.00 | 1.62 | 0.00 | 0.00 | 12.32 | 18.48 | 0.00 | 0.15 |
| UIL.21.14135 | Almarai Graps and berries ( farms select ) | 0.26 | 14.08 | 0.05 | 0.00 | 13.61 | 0.000 | 0.00 | 29.00 | 0.00 | 0.00 | 29.00 | 0.000 | 0.00 | 0.00 | 23.20 | 34.80 | 0.00 | 0.00 | 0.00 | 0.00 | 23.20 | 34.80 | 0.00 | 0.00 |
| UIL.21.13822 | ALMarai orange juice 100%300ml | 2.40 | 9.59 | 0.00 | 0.00 | 9.39 | 0.000 | 1.00 | 29.00 | 0.00 | 0.00 | 29.00 | 0.006 | 0.00 | 3.00 | 23.20 | 34.80 | 0.00 | 0.00 | 0.00 | 0.00 | 23.20 | 34.80 | 0.00 | 0.16 |
| UIL.21.13823 | ALRAWABI ORANGE 1005JUICE | 0.00 | 11.00 | 0.00 | 0.00 | 6.65 | 0.060 |  | 10.56 | 0.06 | 0.00 | 8.53 |  |  |  | 8.45 | 12.67 | 0.00 | 1.56 | 0.00 | 0.00 | 6.53 | 10.53 |  |  |
| UIL.21.13821 | Asafwa natural Orange 200ml | 0.00 | 12.94 | 0.00 | 0.00 | 10.25 | 0.165 | 0.90 | 13.40 |  | 0.10 | 160.00 |  | 0.00 | 2.90 | 10.72 | 16.08 |  |  | 0.00 | 0.90 | 152.00 | 168.00 |  |  |
| UIL.21.14139 | A'SAFWAH MIXED FRUIT JUICE | 0.08 | 14.07 | 0.10 | 0.00 | 11.56 | 0.000 | 0.10 | 12.30 | 0.10 | 0.00 | 12.00 |  | 0.00 | 2.10 | 9.84 | 14.76 | 0.00 | 1.60 | 0.00 | 0.00 | 9.60 | 14.40 |  |  |
| UIL.21.14143 | Fruit drink (orange) , Rani | 0.16 | 13.13 | 0.10 | 0.00 | 11.56 | 0.008 | 0.00 | 12.50 | 0.00 | 0.00 | 12.30 | 0.010 | 0.00 | 0.00 | 10.00 | 15.00 | 0.00 | 0.00 | 0.00 | 0.00 | 9.84 | 14.76 | 0.00 | 0.16 |
| **id_lab** | **Name of Product & Brand** | **Amounts per 100 g/ml  from Laboratory analyses** | | | | | | **Amounts per 100 g/ml  from Labelling** | | | | | | **Tolerances for the nutrition declaration on food products** | | | | | | | | | | | |
| **Prot (g)** | | **Carb (g)** | | **TF (g)** | | **SFA (g)** | | **Sugars (g)** | | **Na (g)** | |
| **Prot1 (g)** | **Carb2 (g)** | **TF3 (g)** | **SFA4 (g)** | **Sugars  (g)** | **Na5 (g)** | **Prot (g)** | **Carb (g)** | **TF (g)** | **SFA (g)** | **Sugars  (g)** | **Na  (g)** | **Low** | **High** | **Low** | **High** | **Low** | **High** | **Low** | **High** | **Low** | **High** | **Low** | **High** |
| UIL.21.14142 | Fruit Nectar (Lacnor) | 0.09 | 13.20 | 0.10 | 0.00 | 12.73 | 0.002 | 0.10 | 13.95 | 0.10 | 0.10 | 13.95 | 0.002 | 0.00 | 2.10 | 11.16 | 16.74 | 0.00 | 1.60 | 0.00 | 0.90 | 11.16 | 16.74 | 0.00 | 0.15 |
| UIL.21.13829 | Mango Juice Mazoon 200ml | 0.00 | 16.44 | 0.00 | 0.00 | 13.44 | 0.000 | 0.22 | 14.70 | 0.00 |  |  |  | 0.00 | 2.22 | 11.76 | 17.64 | 0.00 | 0.00 |  |  |  |  |  |  |
| UIL.21.13824 | Mixed fruit juice (Mazoon) | 0.00 | 13.24 | 0.00 | 0.00 | 11.77 | 0.000 | 0.22 | 14.70 | 0.00 |  |  |  | 0.00 | 2.22 | 11.76 | 17.64 | 0.00 | 0.00 |  |  |  |  |  |  |
| UIL.21.14136 | Nada mango juice | 0.26 | 12.78 | 0.01 | 0.00 | 10.50 | 0.000 | 0.40 | 24.80 | 0.00 | 0.00 | 22.00 | 0.000 | 0.00 | 2.40 | 19.84 | 29.76 | 0.00 | 0.00 | 0.00 | 0.00 | 17.60 | 26.40 | 0.00 | 0.00 |
| UIL.21.14137 | Nada orang juice | 0.70 | 10.27 | 0.05 | 0.00 | 10.46 | 0.000 | 1.20 | 22.60 | 0.00 | 0.00 | 22.00 | 0.000 | 0.00 | 3.20 | 18.08 | 27.12 | 0.00 | 0.00 | 0.00 | 0.00 | 17.60 | 26.40 | 0.00 | 0.00 |
| UIL.21.13827 | Natural mango Asafwa 200ml | 0.00 | 13.74 | 0.00 | 0.00 | 13.13 | 0.005 | 0.27 | 13.50 | 0.00 | 0.00 | 12.60 | 0.000 | 0.00 | 2.27 | 10.80 | 16.20 | 0.00 | 0.00 | 0.00 | 0.00 | 10.08 | 15.12 | 0.00 | 0.00 |
| UIL.21.14141 | Orange drink (Top fruit) | 0.09 | 11.92 | 0.10 | 0.00 | 10.72 | 0.006 | 0.00 | 12.00 | 0.00 | 0.00 | 12.00 | 0.005 | 0.00 | 0.00 | 9.60 | 14.40 | 0.00 | 0.00 | 0.00 | 0.00 | 9.60 | 14.40 | 0.00 | 0.16 |
| UIL.21.13826 | Orange no add sugar (Top fruit) | 0.00 | 10.45 | 0.00 | 0.00 | 9.14 | 0.009 | 0.00 | 10.00 | 0.00 | 0.00 | 9.00 | 0.008 | 0.00 | 0.00 | 8.00 | 12.00 | 0.00 | 0.00 | 0.00 | 0.00 | 7.00 | 11.00 | 0.00 | 0.16 |
| UIL.21.14140 | Sun top orange fruit drink | 0.35 | 12.67 | 0.10 | 0.00 | 11.84 | 0.004 | 0.00 | 14.00 | 0.00 | 0.00 | 14.00 | 0.003 | 0.00 | 0.00 | 11.20 | 16.80 | 0.00 | 0.00 | 0.00 | 0.00 | 11.20 | 16.80 | 0.00 | 0.15 |
| UIL.21.17402 | Tang (orange) (powder) | 0.04 | 96.92 | 0.00 | 0.00 | 96.92 | 0.181 | 0.10 | 23.00 | 0.00 | 0.00 | 23.00 | 0.043 | 0.00 | 2.10 | 18.40 | 27.60 | 0.00 | 0.00 | 0.00 | 0.00 | 18.40 | 27.60 | 0.00 | 0.19 |
| UIL.21.13825 | Topfruit fruit cocktail 200ml | 0.00 | 11.38 | 0.00 | 0.00 | 9.28 | 0.023 | 0.00 | 11.00 | 0.00 | 0.00 | 11.00 | 0.020 | 0.00 | 0.00 | 8.80 | 13.20 | 0.00 | 0.00 | 0.00 | 0.00 | 8.80 | 13.20 | 0.00 | 0.17 |
| UIL.21.13851 | Vimto | 0.00 | 12.58 | 0.00 | 0.00 | 12.39 | 0.000 | 0.10 | 12.50 | 0.00 | 0.00 | 12.50 | 0.002 | 0.00 | 2.10 | 10.00 | 15.00 | 0.00 | 0.00 | 0.00 | 0.00 | 10.00 | 15.00 | 0.00 | 0.15 |
| UIL.21.14129 | Evaporated milk (Rainbow) | 5.94 | 10.57 | 8.85 | 6.25 | 9.54 | 0.105 | 6.90 | 10.00 | 8.50 | 5.80 |  | 0.100 | 4.90 | 8.90 | 8.00 | 12.00 | 7.00 | 10.00 | 4.64 | 6.96 |  |  | 0.00 | 0.25 |
| UIL.21.13450 | Galaxy smooth milk | 3.85 | 92.31 | 0.38 | 0.08 | 73.08 | 0.000 | 2.30 | 20.00 | 12.00 | 7.00 | 20.00 | 0.029 | 0.30 | 4.30 | 16.00 | 24.00 | 9.60 | 14.40 | 5.60 | 8.40 | 16.00 | 24.00 | 0.00 | 0.18 |
| UIL.21.13551 | MAZOON FRESH MILK STRAWBERRY FLAVOUR | 3.07 | 10.75 | 3.21 | 2.36 | 6.47 | 0.054 | 3.30 | 12.10 | 3.00 | 1.70 | 6.20 | 0.050 | 1.30 | 5.30 | 9.68 | 14.52 | 1.50 | 4.50 | 0.90 | 2.50 | 4.20 | 8.20 | 0.00 | 0.20 |
| UIL.21.14570 | Milk powder (Almudhish) | 24.88 | 40.39 | 29.52 | 19.24 | 38.95 | 0.281 | 24.50 | 38.30 | 28.00 | 18.80 | 38.30 | 0.280 | 19.60 | 29.40 | 30.64 | 45.96 | 22.40 | 33.60 | 15.04 | 22.56 | 30.64 | 45.96 | 0.13 | 0.43 |
| UIL.21.14569 | Milk powder (Majan) | 24.10 | 40.99 | 29.21 | 20.19 | 47.83 | 0.330 | 24.00 | 39.00 | 28.00 | 18.00 | 39.00 | 0.255 | 19.20 | 28.80 | 31.20 | 46.80 | 22.40 | 33.60 | 14.40 | 21.60 | 31.20 | 46.80 | 0.11 | 0.41 |
| UIL.21.13553 | Strawberry flavored milk | 3.04 | 12.13 | 2.50 | 1.74 | 12.03 | 0.058 | 8.00 | 30.00 | 3.00 | 3.00 | 30.00 | 0.133 | 6.00 | 10.00 | 24.00 | 36.00 | 1.50 | 4.50 | 2.20 | 3.80 | 24.00 | 36.00 | 0.00 | 0.28 |
| UIL.21.14171 | Strawberry flavored milk (Lacnor) | 2.82 | 10.96 | 3.26 | 1.94 | 9.84 | 0.070 | 2.70 | 11.80 | 3.00 | 1.80 | 11.50 | 0.066 | 0.70 | 4.70 | 9.44 | 14.16 | 1.50 | 4.50 | 1.00 | 2.60 | 9.20 | 13.80 | 0.00 | 0.22 |
| UIL.21.14170 | Strawberry milk (Nada) | 2.18 | 11.68 | 3.21 | 2.27 | 9.67 | 0.049 | 3.10 | 11.50 | 3.00 | 2.10 | 11.50 | 0.043 | 1.10 | 5.10 | 9.20 | 13.80 | 1.50 | 4.50 | 1.30 | 2.90 | 9.20 | 13.80 | 0.00 | 0.19 |
| UIL.21.13552 | Strwaberry milk (Asafwah) | 3.42 | 14.15 | 2.42 | 1.78 | 14.14 | 0.058 | 2.80 | 14.10 | 2.20 | 1.30 | 14.10 | 0.052 | 0.80 | 4.80 | 11.28 | 16.92 | 0.70 | 3.70 | 0.50 | 2.10 | 11.28 | 16.92 | 0.00 | 0.20 |
| UIL.21.13554 | strwberry fresh milk (Alrawabi) | 4.05 | 11.45 | 3.28 | 2.32 | 11.77 | 0.151 | 2.84 | 12.43 | 3.11 |  |  |  | 0.84 | 4.84 | 9.94 | 14.92 | 1.61 | 4.61 |  |  |  |  |  |  |
| UIL.21.14130 | Tea milk (Almudhish) | 5.49 | 10.46 | 8.12 | 4.05 | 9.28 | 0.106 | 6.00 | 9.70 | 7.80 | 3.84 | 9.70 | 0.100 | 4.00 | 8.00 | 7.70 | 11.70 | 6.30 | 9.30 | 3.04 | 4.64 | 7.70 | 11.70 | 0.00 | 0.25 |
| UIL.21.14173 | Energy drink (Red bull) | 0.01 | 11.58 | 0.01 | 0.00 | 10.15 | 0.045 | 0.00 | 10.70 | 0.00 | 0.00 | 10.70 | 0.041 | 0.00 | 0.00 | 8.56 | 12.84 | 0.00 | 0.00 | 0.00 | 0.00 | 8.56 | 12.84 | 0.00 | 0.19 |
| UIL.21.13849 | power horse energy | 0.04 | 11.82 | 0.00 | 0.00 | 11.28 | 0.066 | 0.00 | 28.00 | 0.00 | 0.00 | 28.00 | 0.153 | 0.00 | 0.00 | 22.40 | 33.60 | 0.00 | 0.00 | 0.00 | 0.00 | 22.40 | 33.60 | 0.00 | 0.30 |
| UIL.21.14174 | Coca cola | 0.01 | 10.95 | 0.01 | 0.00 | 9.78 | 0.015 |  | 10.60 |  |  | 10.60 |  |  |  | 8.48 | 12.72 |  |  |  |  | 8.48 | 12.72 |  |  |
| UIL.21.14172 | Lipton Peach Ice tea | 0.10 | 4.51 | 0.01 | 0.00 | 4.40 | 0.011 | 0.00 | 4.60 | 0.00 | 0.00 | 4.50 | 0.009 | 0.00 | 0.00 | 2.60 | 6.60 | 0.00 | 0.00 | 0.00 | 0.00 | 2.50 | 6.50 | 0.00 | 0.16 |
| UIL.21.14177 | Malt beverage (Barbican) | 0.26 | 2.97 | 0.01 | 0.00 | 2.22 | 0.010 | 0.10 | 2.80 | 0.00 | 0.00 | 1.90 | 0.015 | 0.00 | 2.10 | 0.80 | 4.80 | 0.00 | 0.00 | 0.00 | 0.00 | 0.00 | 3.90 | 0.00 | 0.17 |
| UIL.21.14176 | Mountain Dew | 0.01 | 12.31 | 0.01 | 0.00 | 11.55 | 0.016 | 0.00 | 12.00 | 0.00 | 0.00 | 12.00 | 0.015 | 0.00 | 0.00 | 9.60 | 14.40 | 0.00 | 0.00 | 0.00 | 0.00 | 9.60 | 14.40 | 0.00 | 0.17 |
| UIL.21.14175 | Pepsi | 0.01 | 10.20 | 0.01 | 0.00 | 9.98 | 0.010 | 0.00 | 11.00 | 0.00 | 0.00 | 11.00 | 0.010 | 0.00 | 0.00 | 8.80 | 13.20 | 0.00 | 0.00 | 0.00 | 0.00 | 8.80 | 13.20 | 0.00 | 0.16 |
| UIL.21.14178 | Vitaene Extra (Pokka) | 0.01 | 14.78 | 0.01 | 0.00 | 13.36 | 0.000 | 0.00 | 17.80 | 0.00 |  | 17.80 | 0.001 | 0.00 | 0.00 | 14.24 | 21.36 | 0.00 | 0.00 |  |  | 14.24 | 21.36 | 0.00 | 0.15 |

1: Protein. 2: Carbohydrates. 3: Total fat. 4: Saturated fatty acids. 5: Sugars. 6: Sodium.
